# Supplementary material for: Feasibility and acceptability of telehealth coaching to promote healthy eating in chronic kidney disease: a mixed-methods process evaluation
Source: PubMed Central journal article supplement — BMJ Open. 2019 Jan 29;9(1):e024551. doi: 10.1136/bmjopen-2018-024551 (PMC6352771; doi:10.1136/bmjopen-2018-024551), 2019-01-29
Supplement: bmjopen-2018-024551.draft_revisions.pdf [file bmjopen-2018-024551.draft_revisions.pdf]

# BMJ Open

BMJ Open is committed to open peer review. As part of this commitment we make the peer review history of every article we publish publicly available.

When an article is published we post the peer reviewers' comments and the authors' responses online. We also post the versions of the paper that were used during peer review. These are the versions that the peer review comments apply to.

The versions of the paper that follow are the versions that were submitted during the peer review process. They are not the versions of record or the final published versions. They should not be cited or distributed as the published version of this manuscript.

BMJ Open is an open access journal and the full, final, typeset and author-corrected version of record of the manuscript is available on our site with no access controls, subscription charges or pay-per-view fees (<http://bmjopen.bmj.com>).

If you have any questions on BMJ Open's open peer review process please email [editorial.bmjopen@bmj.com](mailto:editorial.bmjopen@bmj.com)

# BMJ Open

## Telehealth Coaching to Promote Healthy Eating in Chronic Kidney Disease: A Mixed Methods Process Evaluation

|                               |                                                                                                                                                                                                                                                                                                                                                                                                                                                                                                                                                                                                                                                                                                                                                                                                                                                                                                                                                                                                                                                                                                                       |
|-------------------------------|-----------------------------------------------------------------------------------------------------------------------------------------------------------------------------------------------------------------------------------------------------------------------------------------------------------------------------------------------------------------------------------------------------------------------------------------------------------------------------------------------------------------------------------------------------------------------------------------------------------------------------------------------------------------------------------------------------------------------------------------------------------------------------------------------------------------------------------------------------------------------------------------------------------------------------------------------------------------------------------------------------------------------------------------------------------------------------------------------------------------------|
| Journal:                      | <i>BMJ Open</i>                                                                                                                                                                                                                                                                                                                                                                                                                                                                                                                                                                                                                                                                                                                                                                                                                                                                                                                                                                                                                                                                                                       |
| Manuscript ID                 | bmjopen-2018-024551                                                                                                                                                                                                                                                                                                                                                                                                                                                                                                                                                                                                                                                                                                                                                                                                                                                                                                                                                                                                                                                                                                   |
| Article Type:                 | Research                                                                                                                                                                                                                                                                                                                                                                                                                                                                                                                                                                                                                                                                                                                                                                                                                                                                                                                                                                                                                                                                                                              |
| Date Submitted by the Author: | 03-Jun-2018                                                                                                                                                                                                                                                                                                                                                                                                                                                                                                                                                                                                                                                                                                                                                                                                                                                                                                                                                                                                                                                                                                           |
| Complete List of Authors:     | <p>Kelly, Jaimon; Bond University, Faculty of Health Science and Medicine<br/> Warner, Molly; Bond University, Faculty of Health Science and Medicine<br/> Conley, Marguerite; Princess Alexandra Hospital, Department of Nutrition and Dietetics<br/> Reidlinger, Dianne; Bond University, Faculty of Health Sciences and Medicine<br/> Hoffman, Tammy; Bond University, Faculty of Health Science and Medicine<br/> Craig, Jonathan; Flinders University Faculty of Medicine Nursing and Health Sciences, College of Medicine and Public Health, ; The Children's Hospital at Westmead, Centre for Kidney Research<br/> Tong, Allison; The University of Sydney, Sydney School of Public Health<br/> Reeves, Marina; University of Queensland,<br/> Johnson, David; University of Queensland, Centre for Kidney Disease Research; Princess Alexandra Hospital, Department of Nephrology<br/> Palmer, Suetonia; University of Otago, Department of Medicine<br/> Campbell, Katrina; Bond University, Faculty of Health Sciences and Medicine; Princess Alexandra Hospital, Department of Nutrition and Dietetics</p> |
| Keywords:                     | Diet, Telehealth, chronic kidney disease, process evaluation                                                                                                                                                                                                                                                                                                                                                                                                                                                                                                                                                                                                                                                                                                                                                                                                                                                                                                                                                                                                                                                          |
|                               |                                                                                                                                                                                                                                                                                                                                                                                                                                                                                                                                                                                                                                                                                                                                                                                                                                                                                                                                                                                                                                                                                                                       |

SCHOLARONE™  
Manuscripts

1 **Telehealth Coaching to Promote Healthy Eating in Chronic Kidney Disease: A Mixed**  
2  
3  
4 **Methods Process Evaluation**

5  
6  
7  
8 **Author contact information**  
9

10 Jaimon T Kelly

11  
12 MNutrDiet<sup>1</sup>, [jkelly@bond.edu.au](mailto:jkelly@bond.edu.au)  
13

14 Molly M Warner

15  
16 MNutrDietPrac<sup>1</sup>, [mwarner@bond.edu.au](mailto:mwarner@bond.edu.au)  
17

18 Marguerite Conley

19  
20 MNutr&Diet<sup>2</sup>, [marguerite.conley@health.qld.gov.au](mailto:marguerite.conley@health.qld.gov.au)  
21  
22

23 Dianne P Reidlinger

24  
25 Assistant Professor<sup>1</sup>, PhD, [dreidlin@bond.edu.au](mailto:dreidlin@bond.edu.au)  
26

27 Tammy Hoffmann

28  
29 Professor<sup>3</sup>, PhD, [thoffman@bond.edu.au](mailto:thoffman@bond.edu.au)  
30  
31

32 Jonathan Craig

33  
34 Professor,<sup>5,6</sup> PhD, [jonathan.craig@flinders.edu.au](mailto:jonathan.craig@flinders.edu.au)  
35

36 Allison Tong

37  
38 Associate Professor,<sup>4,5</sup> PhD, [allison.tong@sydney.edu.au](mailto:allison.tong@sydney.edu.au)  
39  
40

41 Marina Reeves

42  
43 Associate Professor<sup>6</sup>, PhD, [m.reeves@sph.uq.edu.au](mailto:m.reeves@sph.uq.edu.au)  
44

45 David W Johnson

46  
47 Professor<sup>7,8,9</sup>, PhD, [david.johnson2@health.qld.gov.au](mailto:david.johnson2@health.qld.gov.au)  
48

49 Suetonia Palmer

50  
51 Associate Professor<sup>10</sup>, PhD, [suetonia.palmer@otago.ac.nz](mailto:suetonia.palmer@otago.ac.nz)  
52

53 Katrina L Campbell

54  
55 Associate Professor<sup>1,2</sup>, PhD, [kcampbel@bond.edu.au](mailto:kcampbel@bond.edu.au)  
56  
57  
58  
59  
60

## Affiliations

1. Faculty of Health Science and Medicine, Bond University, Robina, Queensland, Australia
2. Department of Nutrition and Dietetics, Princess Alexandra Hospital, Queensland, Australia
3. Centre for Research in Evidence Based Practice, Faculty of Health Sciences and Medicine, Bond University, Gold Coast, Australia
4. Sydney School of Public Health, The University of Sydney
5. Centre for Kidney Research, The Children's Hospital at Westmead
6. College of Medicine and Public Health, Flinders University
7. Cancer Prevention Research Centre, School of Public Health, The University of Queensland, Herston, Queensland, Australia
8. Department of Nephrology, Princess Alexandra Hospital, Brisbane, Australia
9. Centre for Kidney Disease Research, University of Queensland, Brisbane, Australia
10. Translational Research Institute, Brisbane, Australia
11. Department of Medicine, University of Otago Christchurch, Christchurch, New Zealand.

## Funding

This study was supported by a research support grant awarded by Kidney Health Australia via Australasian Kidney Trial Network (AKTN), and a Vice-Chancellors Research Award through Bond University.

## Conflict of interest

The authors declare that they have no conflicts of interest.

## Author contributions

JK wrote the first draft of the manuscript and takes responsibility for the integrity of the data. JK, KC, DJ, MR and SP assisted in the conceptualization of the trial design. MW & DR were

1 responsible for the qualitative data collection and analysis, assisted in the conceptualization of the  
2 qualitative research methods. MW wrote the qualitative results section of the manuscript. JK & MC  
3  
4 designed the intervention materials and were responsible for the management of the trial at their  
5  
6  
7  
8  
9  
10  
11  
12  
13  
14  
15  
16  
17  
18  
19  
20  
21  
22  
23  
24  
25  
26  
27  
28  
29  
30  
31  
32  
33  
34  
35  
36  
37  
38  
39  
40  
41  
42  
43  
44  
45  
46  
47  
48  
49  
50  
51  
52  
53  
54  
55  
56  
57  
58  
59  
60

**Data sharing:**

No additional data available.

**Keywords** Diet; telehealth; chronic kidney disease; process evaluation.

**Abstract word count:** 295

**Text word count:** 4,417

**Corresponding author**

**Jaimon T. Kelly**

Faculty of Health Science and Medicine, Bond University

14 University Drive, Robina, Queensland, 4226, Australia

E-mail: [jkelly@bond.edu.au](mailto:jkelly@bond.edu.au)

## ABSTRACT

**Objective:** To evaluate the feasibility and acceptability of a personalized telehealth intervention to support dietary self-management in adults with stage 3-4 CKD.

**Design:** Mixed-methods process evaluation embedded in a randomized controlled trial.

**Participants:** People with stage 3-4 CKD (eGFR 15-60mL/min/1.73m<sup>2</sup>).

**Setting:** Participants were recruited from three hospitals in Australia and completed the intervention in ambulatory community settings.

**Intervention:** The intervention group received one telephone call per fortnight and 2-8 tailored text messages for three months, and then 4-12 tailored text messages for three months without telephone calls. The control group received usual care for three months then non-tailored education-only text messages for three months.

**Main outcome measures:** Feasibility (recruitment, non-participation and retention rates, intervention fidelity, and participant adherence) and acceptability (questionnaire and semi-structured interviews).

**Statistical analyses performed:** Descriptive statistics and qualitative content analysis.

**Results:** Overall, 80/230 (35%) eligible patients who were approached consented to participate (mean±SD age 61.5±12.6 years). Retention was 93% and 98% in the intervention and control groups, respectively, and 96% of all planned intervention calls were completed. All participants in the intervention arm identified the tailored text messages as useful in supporting dietary self-management. In the control group, 27 (69%) reported the non-tailored text messages were useful in supporting change. Intervention group participants reported that the telehealth program delivery methods were practical and able to be integrated into their lifestyle. Participants viewed the intervention as an acceptable, personalized alternative to face-face clinic consultations, and were satisfied with the frequency of contact.

1 **Conclusions:** This telehealth-delivered dietary coaching program is an acceptable intervention  
2  
3 which appears feasible for supporting dietary self-management in stage 3-4 CKD. A larger-scale  
4  
5 randomized controlled trial is needed to evaluate the efficacy of the coaching program on clinical  
6  
7 and patient-reported outcomes.  
8  
9

10 **Trial registration:** Prospectively registered (ACTRN12616001212448)  
11  
12  
13

#### 14 **Article Summary**

- 16 • This study utilized a pragmatic design which enhanced its feasibility.
- 17
- 18 • Mixed methods captured both quantitative and qualitative data to determine multiple  
19  
20 aspects of feasibility and acceptability.  
21  
22
- 23 • Interview data to determine the intervention's acceptability were not captured in control  
24  
25 group participants.  
26  
27  
28  
29  
30  
31  
32  
33  
34  
35  
36  
37  
38  
39  
40  
41  
42  
43  
44  
45  
46  
47  
48  
49  
50  
51  
52  
53  
54  
55  
56  
57  
58  
59  
60

## INTRODUCTION

Chronic kidney disease (CKD) is a progressive condition affecting over 10% of the population worldwide.<sup>1</sup> Diet is a modifiable risk factor for the progression of CKD to end-stage kidney disease (ESKD).<sup>2,3</sup> Typical dietary advice includes restricting individual nutrients, such as sodium, protein, potassium and phosphate. However, there is little evidence regarding the adherence to, and efficacy of, nutrient-specific dietary advice.<sup>4</sup> Recent evidence suggests that following a healthy dietary pattern, as a whole food-based dietary pattern is associated with a reduced risk of death in established CKD.<sup>5</sup> A focus on foods rather than single nutrients may also facilitate increased adherence to dietary change in CKD<sup>5,6</sup> which is otherwise challenging due to dietary complexity and competing demands of self-management.<sup>7</sup> Overcoming these barriers to implementation of sustained dietary change are necessary to test whether improving diet quality alters patient-centered outcomes.

Providing regular and individualized dietary support required for those with CKD comes with geographical, time and financial barriers.<sup>8</sup> To determine whether increasing diet quality (through dietary pattern) may attenuate the progression of CKD and elevated cardiovascular risk on a sufficient scale for a randomized controlled trial (RCT), alternative modalities that are effective in supporting dietary management are needed. Telehealth modalities, particularly telephone-based and text message coaching, present an opportunity to overcome barriers and challenges that people with CKD encounter in accessing health care services.<sup>7,9</sup> Telehealth interventions may facilitate an increased frequency and quality of contact between the patient and healthcare professional,<sup>10,11</sup> which may improve acceptability, uptake and adherence to interventions<sup>12</sup> and better align with a patient-centered model of care.<sup>9</sup> Compared to face-to-face consultations,<sup>11</sup> telehealth modalities are effective in reducing chronic disease risk, including improving diet quality, fruit and vegetable consumption and reducing dietary sodium intake.<sup>10</sup> Text messaging has been utilized to 'extend contact' after an intervention and has been shown to maintain clinical outcomes and minimize



1 intervention decay.<sup>13,14</sup> A systematic review of text message health interventions highlighted the  
2 need for better evidence on the relative effectiveness of text-based interventions including message  
3 delivery (incorporating frequency and timing), level of interaction (i.e. response and feedback) and  
4 impact of additional interventions (such as a combination with telephone, face-to-face, video or  
5 internet).<sup>15</sup>  
6  
7  
8  
9  
10  
11  
12

13  
14 While dietary patterns aligned with a higher diet quality are associated with improved lower  
15 mortality in CKD,<sup>5</sup> the level of coaching required to achieve and support dietary self-management  
16 is largely unknown. Furthermore, evidence to support the level of tailoring, and the delivery method  
17 that is most feasible and acceptable for patients with CKD, is lacking. Therefore, this pilot study  
18 aimed to evaluate the feasibility and acceptability of telehealth-delivered dietary coaching to  
19 support dietary self-management in stage 3-4 CKD.  
20  
21  
22  
23  
24  
25  
26  
27

## 28 **MATERIALS AND METHODS**

29  
30  
31 We used a mixed methods design, whereby qualitative data on the patient experiences were  
32 embedded within quantitative data relating to participants recruited into the Evaluation of  
33 iNdividualized Telehealth Intensive Coaching to promote healthy Eating and lifestyle in Chronic  
34 Kidney Disease (ENTICE-CKD) program. All data was prospectively collected. This pilot  
35 randomized controlled trial was prospectively registered (ACTRN12616001212448) and reported  
36 based on the extension of the CONSORT statement for feasibility and pilot studies.<sup>16</sup> This trial was  
37 approved by the Metro South Health Service District Human Research Ethics Committee  
38 (EC00167) and Bond University Human Research Ethics Committee (EC00357).  
39  
40  
41  
42  
43  
44  
45  
46  
47  
48  
49

### 50 **Design**

51  
52  
53 This mixed-methods process evaluation was embedded in a randomized controlled trial, conducted  
54 from November 2016 to November 2017. The dietary intervention was designed using the social  
55 cognitive theory,<sup>17</sup> with a patient-centered focus on improving self-management to reduce dietary  
56  
57  
58  
59  
60

1 sodium intake (<2300mg/day) and increase dietary quality in accordance with the Australian  
2 Dietary Guidelines (see Supplementary Table 1 for intervention guidance).<sup>18</sup> Interventions were  
3 adjunct to usual nephrology care from treating physician(s) and renal team members, including ad  
4 hoc referrals to allied health practitioners during the study.  
5  
6  
7  
8  
9

## 10 **Participants**

11  
12  
13  
14 Participants were recruited from three tertiary nephrology units in Queensland, Australia over a six  
15 month period. Inclusion criteria were: adults over 18 years of age; stage 3-4 CKD (eGFR 15-  
16 60mL/min/1.73m<sup>2</sup>); and access to a mobile device capable of receiving text messages and telephone  
17 calls. Exclusion criteria were: anticipated dialysis commencement or kidney transplant within the  
18 following 12 months; pregnancy; non-English speaking; cognitively impaired; or deemed unfit to  
19 participate by their treating nephrologist.  
20  
21  
22  
23  
24  
25  
26  
27  
28

29 Eligible participants were randomized on a 1:1 ratio into one of two groups (stratified by recruiting  
30 site and diabetes status). Randomization was completed by computer-generated random numbers  
31 carried out by an independent statistician not involved in the study.  
32  
33  
34  
35  
36

## 37 **Study treatment**

38  
39  
40 The ENTICE-CKD program was completed in two three-month phases in both the intervention and  
41 control group of the study as detailed in Supplementary Figure 1. Each participant was involved in  
42 the trial for six consecutive months. All participants were provided with an ENTICE-CKD  
43 workbook at the baseline visit. The 90-page workbook included information on setting *specific,*  
44 *measurable, achievable, realistic, and time-bound* (SMART) goals; eating well for kidneys (based  
45 on the Australian Dietary Guidelines);<sup>18</sup> active living (based on the Australian Physical Activity  
46 Guidelines);<sup>19</sup> role of diet in kidney disease, strategies for planning, self-monitoring checklists, and  
47 a list of useful websites, apps, and recipes for further reference.  
48  
49  
50  
51  
52  
53  
54  
55  
56  
57  
58  
59  
60

## 1 **Telehealth coaches**

2  
3  
4 Each participant was assigned to one of two telehealth coaches at baseline. The participant had the  
5 same coach for the duration of the program. Both telehealth coaches were registered dietitians  
6 (Australian equivalent) with additional training in renal nutrition, behavior change and motivational  
7 interviewing; were external to the recruiting sites and had never met the participants; and were not  
8 involved in any outcome data collection.  
9  
10  
11  
12  
13  
14  
15

## 16 **Phase 1**

17  
18  
19 The participants in the intervention group received six fortnightly telephone calls in phase 1 which  
20 were scheduled on weekdays at a time of the participants choosing (from 7am to 7pm). The first  
21 call was scheduled for 45 minutes and five subsequent for approximately 30 minutes. Each call was  
22 based on established protocols and call scripts. The telephone call content was guided by the  
23 workbook topics, structured according to the 5A's framework (Assess, Advise, Agree, Assist,  
24 Arrange),<sup>20</sup> and individually tailored to participants using relevant educational strategies, and in  
25 consideration of the participant goals and co-morbidities. Where required, 24-hour dietary recalls  
26 were undertaken during coaching calls to track adherence and progress with goals. Coaches used  
27 Microsoft Excel<sup>21</sup> to document progress of each call and log information including goal setting,  
28 implementation intentions, self-monitoring tools, call attempts and durations, and text message  
29 preferences.  
30  
31  
32  
33  
34  
35  
36  
37  
38  
39  
40  
41  
42  
43  
44  
45

46 In addition, participants in the intervention group received two to eight text messages scheduled  
47 between coaching calls with the actual number and time of day determined by each participant's  
48 preference. Text categories included: educational; self-monitoring; and goal setting. The schedule  
49 of text messages for the intervention and control group in phase 1 and 2 is detailed in  
50 Supplementary Table 2. The text messages were sent using a web-based, semi-automated text  
51 message management platform (Propelo, [www.propelo.com.au](http://www.propelo.com.au)), developed and administered by  
52  
53  
54  
55  
56  
57  
58  
59  
60

1 The University of Queensland's School of Public Health.<sup>22</sup> The investigators, in consultation with  
2 local nephrologists, dietitians and evidence-based practice guidelines, designed the library of text  
3 messages, which were then reviewed for comprehension by a group of patients, nephrologists and  
4 members of the investigator team. The text message library was imported into the software  
5 platform, which was designed to tailor text messages based on: participant's name; individual goals;  
6 barriers to achieving goals; and, participant-identified solutions to overcoming those barriers. These  
7 tailoring variables were modified as required following each coaching call.  
8  
9

10  
11  
12  
13  
14  
15  
16  
17  
18  
19 As shown in Supplementary Table 2, participants in the intervention group could receive one 'goal  
20 check' per goal (total 2 goal checks) per fortnight in phase 1 and up to 2 goal checks per goal (total  
21 2 to 4 goal checks) per fortnight in phase 2. These goal checks required the participant to respond to  
22 the text with a "yes" or "no" which prompted the software to send a pre-determined response. An  
23 incoming text reply outside protocol (i.e. not a "yes" or "no" response) was classified as an  
24 'unrecognized response'. This triggered an email to the participant's coach and was only responded  
25 to where participants expressed considerable risk to their health (e.g. symptoms needing medical  
26 attention).  
27  
28  
29  
30  
31  
32  
33  
34  
35  
36  
37

38 Participants in the control group received no coaching or text messages between the baseline visit  
39 and three months (phase 1). The control group continued to receive standard care under their  
40 treating nephrologist (typically 1 clinic visit every 3 months) and were encouraged to work through  
41 the ENTICE-CKD workbook at their own pace.  
42  
43  
44  
45  
46  
47

## 48 **Phase 2**

49  
50  
51 At three months, participants in the intervention group completed a tailoring telephone call to  
52 determine individual preferences for the timing and frequency of text messages for phase 2. At 18  
53 weeks (i.e. half way through phase 2), participants received a second tailoring call where they could  
54  
55  
56  
57  
58  
59  
60

1 modify the timing and frequency of text messages and could update their goals. Intervention group  
2 participants chose text message frequencies (four to 12 text messages per fortnight) for the same  
3 types of texts that they received in phase 1 (educational tips, self-monitoring, goal checks).  
4  
5  
6  
7  
8 Participants in the control group received non-tailored education-only text messages (described in  
9  
10 Supplementary Table 2).  
11

### 12 13 **Data collection**

14  
15  
16 Each participant attended a baseline, three-month (mid-point), and six-month (end-point) visit with  
17 a local site investigator (nurse or dietitian blinded to group assignments) at their study site to collect  
18 all clinical objective data (not reported here). All participants' study visits were scheduled on  
19 separate days or hours apart to avoid risk of contamination bias. Basic demographic data (including  
20 participant's age and gender) were recorded at baseline. Socio-economic status was estimated from  
21 participants' postcodes, according to the Index of Relative Socio-economic Advantage and  
22 Disadvantage (IRSAD).<sup>23</sup> Baseline health literacy was collected using the single item Literacy  
23 Screener which classifies health literacy as good or limited based on the single question, "How  
24 often do you need to have someone help you when you read instructions, pamphlets, or other  
25 written material from your doctor or pharmacy?"<sup>24</sup>  
26  
27  
28  
29  
30  
31  
32  
33  
34  
35  
36  
37  
38

### 39 **Reach and retention**

40  
41  
42 The sample size was determined for the purpose of informing a future study. Therefore, a target of  
43 30-40 participants per arm was set to allow for meaningful and reliable data, which could be used to  
44 power future trials.<sup>25</sup> Recruitment and non-participation rates were captured across the three  
45 recruitment sites, with a goal to achieve the target sample size of 80 participants in the six month  
46 recruitment time frame. Retention rate was measured at three and six months in both study groups,  
47  
48  
49  
50  
51  
52  
53 with successful retention defined 80% at the six-month study end.  
54  
55

### 56 **Intervention delivery**

1 Individual cases were discussed fortnightly between the coaches and the lead investigator to support  
2 consistent intervention delivery. All coaching calls were audio recorded, from which 10% were  
3 assessed for consistency by peer-review by an individual external to the project. The following  
4 fidelity data were collected and stored in a Microsoft Excel<sup>21</sup> database throughout the trial: number,  
5 duration and content of coaching telephone calls; number and type of text messages delivered;  
6 number and type of text message responses; and time spent by coaches for each interaction.  
7  
8  
9

### 15 ***Intervention adherence***

18 Adherence was defined as successfully completing five of the six telephone calls for the  
19 intervention group. Data was also collected on individual participant adherence to the dietary  
20 intervention, collected by coaches in each telephone call using a call log template in Microsoft  
21 Excel.<sup>21</sup> In the call logs, coaches described evidence of the participant's overall progress, evidence  
22 of self-monitoring, goals set and implementation intentions (behaviours implemented to achieve  
23 goals) during each call, which was quantified in counts to capture participant adherence.  
24  
25  
26  
27  
28  
29  
30

### 32 ***Acceptability***

35 A utility and acceptability survey of the text message component of the ENTICE-CKD trial was  
36 collected from all participants at the six-month end of study visit (Supplementary Table 3). The  
37 survey included 13 items, developed specifically for the study, with five items asking participants to  
38 rate on a 5-point Likert scale from 1 'strongly disagree' to 5 'strongly agree', four items asking  
39 participants yes/no questions, and four multiple choice questions, based on previous methodology  
40 in cardiac patients.<sup>26</sup> In addition to this, during the sixth telephone call (three-month study mid-  
41 point; for intervention participants only), coaches obtained verbal consent of participants to be  
42 approached to complete an interview relating to their experiences of the intervention.  
43  
44  
45  
46  
47  
48  
49  
50  
51

52 Semi-structured interviews were conducted in-person and by telephone. Participants were recruited  
53 based on consecutive sampling of completing participants until data saturation was achieved. The  
54  
55  
56  
57  
58

1 interviews were conducted by investigator (MW), who had not previously met the participants and  
2 was not involved in the planning of the intervention. The interview guide included questions on:  
3 barriers and facilitators of program adherence; telehealth delivery methods and frequency of  
4 contact; usability of the program; goal setting, self-monitoring, behavior change; and experiences  
5 (Supplementary Table 4). Modification of the interview guide occurred after each interview to  
6 broaden scope of the data collected. Interviews were audio-recorded and transcribed verbatim.  
7  
8  
9  
10  
11  
12  
13

### 14 **Patient involvement**

15 The study was designed in collaboration with similar participants as those recruited for this study.  
16 This patient engagement was conducted as a qualitative study, reported elsewhere by the  
17 investigators<sup>9</sup> and details the patient reported burden associated with following dietary  
18 recommendations that were considered while developing this trial. All intervention materials,  
19 including the workbook and text messages, were reviewed by people with CKD with feedback  
20 forms which were used to revise all the material before production. No patients were involved in the  
21 recruitment or data collection of this process evaluation study. A summary of the main results will  
22 be mailed out to participants. The burden of the trial has been evaluated in semi-structured  
23 interviews (unpublished data in preparation).  
24  
25  
26  
27  
28  
29  
30  
31  
32  
33  
34  
35  
36

### 37 **Data analysis**

38 Quantitative data were analyzed using simple descriptive statistics (counts and percentages). To  
39 determine the difference in the utility and acceptability between the two study groups, a standard  
40 Chi square test was used with a significance level determined as  $p < 0.05$ . Statistics were conducted  
41 in SPSS Statistics for Windows (version 22.0. Chicago: SPSS Inc.) and Microsoft Excel.<sup>21</sup>  
42  
43  
44  
45  
46  
47  
48

49 Inductive content analysis<sup>27</sup> of the semi-structured interview transcripts regarding acceptability of  
50 the intervention was conducted researcher (MW) who was not involved in quantitative data  
51 planning, collection and analysis. After familiarization with the data, an open coding approach was  
52 adopted to identify, develop and finalize categories and subcategories within the data. A dietitian  
53  
54  
55  
56  
57  
58  
59

1 and qualitative researcher (DR) familiar with the data then finalized and confirmed emerging  
2 categories that were relevant to the process evaluation. Verbatim quotes were collected and used to  
3 represent attributes demonstrated for both the feasibility and acceptability of the ENTICE-CKD  
4 program. Microsoft Word<sup>28</sup> was used to facilitate data management (tables) and basic content  
5 analysis (comments relating to attributes demonstrating feasibility and acceptability) of data.  
6  
7  
8  
9  
10  
11  
12  
13  
14  
15  
16  
17  
18  
19  
20  
21  
22  
23  
24  
25  
26  
27  
28  
29  
30  
31  
32  
33  
34  
35  
36  
37  
38  
39  
40  
41  
42  
43  
44  
45  
46  
47  
48  
49  
50  
51  
52  
53  
54  
55  
56  
57  
58  
59  
60

For peer review only



## RESULTS

### Characteristics of participants

The baseline characteristics of the participants are reported in Table 1. Of the 80 participants who completed their baseline visit, 64% were men and had a mean age of 62 years. The stage of CKD varied within the sample, with 31% stage 3a (eGFR 45-59ml/min/1.73m<sup>2</sup>), 44% stage 3b (eGFR 30-44ml/min/1.73m<sup>2</sup>) and 25% stage 4 (eGFR 15-29ml/min/1.73m<sup>2</sup>). The most common comorbidities were hypertension (81%) and diabetes (39%) (Table 1). Baseline health literacy was good in over 90% of all participants. Randomization was effective at distributing all measured demographic characteristics.

### Reach and retention

Participants were recruited between November 2016 and May 2017, from Gold Coast (43%), Sunshine Coast (31%) and Brisbane (26%) hospitals. The flow of participants through the ENTICE-CKD study is shown in Figure 1. A total of 230 potentially eligible individuals were approached and invited to participate, of whom 80 participants (35%) were recruited to the ENTICE-CKD trial. Of the 146 individuals who declined to participate, “not interested/other” were the most commonly stated reasons for non-participation (49%) with reasons documented in Figure 1. ‘Other’ reasons for non-participation included: already feeling healthy (5%), already seeing a dietitian (5%), believed the intervention did not fit their current lifestyle (3%) or preferred not to use technology (1%). A further two individuals consented to the study but did not attend a baseline visit and were therefore not randomized to a treatment group.

Seventy-six (95%) of all randomly allocated participants completed the six-month telehealth program. A total of four (5%) participants withdrew from the study. All the withdrawals occurred in the first three months of the program. Three of the four participants who withdrew were from the intervention group (two were unable to be contacted and therefore did not commence the program,

1 and one participant was unable to continue due to a family illness). The sole participant who  
2 withdrew from the control group did not report a reason for doing so. There were no appreciable  
3 differences in the demographics of those participants who dropped out compared to those remaining  
4 in the trial.  
5  
6  
7  
8  
9

### 10 **Intervention delivery**

11 Table 2 shows the adherence to the planned delivery of the telephone and text message components  
12 of the ENTICE-CKD intervention. The delivery of the scheduled telephone calls was conducted  
13 according to protocol with 90% of planned calls being completed as scheduled. The mean duration  
14 of the first intervention call was 45.5±10 minutes (range 28 to 75 minutes). The mean length of the  
15 subsequent five calls was 24±10 minutes (range 2 to 62 minutes).  
16  
17  
18  
19  
20  
21  
22  
23  
24  
25

26 A total of 4,985 intervention text messages were sent to ENTICE participants. The median number  
27 of text messages sent to participants was within protocol for both groups, with intervention  
28 participants receiving a median of four text messages per fortnight in phase 1 and seven per  
29 fortnight in phase 2. Control participants received a median of six non-tailored education-only text  
30 messages per fortnight in phase 2 (Table 2). The total number of incoming text messages (replies  
31 from participants) was 1,100 (Table 2), 36% (n=400) triggered the appropriate goal-check reply,  
32 3% (n=31) required the dietitian coach to send a tailored text message to address the concern raised  
33 by the sender and 61% (n=669) required no reply.  
34  
35  
36  
37  
38  
39  
40  
41  
42  
43  
44

### 45 **Intervention adherence**

46 A total of 38 participants (95%) completed at least five calls, and 36 (90%) completed all six calls.  
47 Two participants (5%) never received a telephone call. Goal setting was completed by all  
48 participants in the first call as planned, with 95% of the participants setting two or more goals. The  
49 coaches' call logs showed that, throughout the program, participants continued setting new goals  
50 with 10 (26%) updating at least one goal in call two and 22 (61%) updating at least one goal  
51  
52  
53  
54  
55  
56  
57  
58  
59  
60

1 throughout the remaining four calls (Table 3). A total of 29 (76%) participants showed evidence of  
2 self-monitoring by the second call, which was sustained throughout phase 1 of the intervention.  
3  
4 Evidence of implementation intentions indicated that the majority of participants (82%) needed at  
5  
6 least two calls to begin putting planned dietary intentions in place. This number continued to rise  
7  
8 over the next four calls to 97% by the end of phase 1 of the intervention.  
9  
10  
11

## 12 **Acceptability**

### 13 *Utility and acceptability*

14  
15  
16  
17  
18  
19  
20  
21  
22  
23  
24  
25  
26  
27  
28  
29  
30  
31  
32  
33  
34  
35  
36  
37  
38  
39  
40  
41  
42  
43  
44  
45  
46  
47  
48  
49  
50  
51  
52  
53  
54  
55  
56  
57  
58  
59  
60  
There were several differences in ratings for utility and acceptability between the intervention  
(tailored-text) group compared to the non-tailored education-only text message (control) group  
(Table 4). Participants agreed (responses for 'agree' and 'strongly agree') that the text message  
component: supported their dietary self-management (intervention 100%; 69% control,  $p=0.003$ );  
provided motivation to change their diet (intervention 75%, control 50%;  $p=0.03$ ); and led them to a  
healthier diet (intervention 81%, control 61%,  $p=0.06$ ). There were no other differences observed in  
the utility of the text messages between the groups. The majority of text messages were saved and  
not deleted (77% overall), and 62% were shared with family, friends or health care providers across  
the two study groups. Acceptability of the text messages was assessed as highly acceptable with  
78% of participants reporting that the characteristics of the text messages (language, frequency,  
program length, time of delivery) were satisfactory.

### 61 *Attributes of feasibility and acceptability*

62  
63  
64  
65  
66  
67  
68  
69  
70  
71  
72  
73  
74  
75  
76  
77  
78  
79  
80  
81  
82  
83  
84  
85  
86  
87  
88  
89  
90  
91  
92  
93  
94  
95  
96  
97  
98  
99  
100  
Twenty one intervention participants were interviewed upon completion of phase 1, either by  
telephone ( $n=20$ ) or face-to-face ( $n=1$ ). Interviews ranged from 20 to 96 minutes (mean 49 min).  
Overall, participants had positive experiences with the ENTICE-CKD trial. Attributes of the  
discussions are described in nine categories within components of acceptability and feasibility  
(Table 5). The acceptability categories discussed by participants were: acceptable alternative to

1 clinic, preference for voice communication, regular contact via text message, and personalized  
2 messages valued. The categories described under feasibility were: program integrated into lifestyle,  
3  
4 messages valued. The categories described under feasibility were: program integrated into lifestyle,  
5  
6 diverse delivery modes, social accountability, responding to dietary advice, and infeasible elements  
7  
8 beyond intervention. Participants emphasized the importance of social accountability; all  
9  
10 participants expressed benefit from the relationship built with their coach. Participants identified  
11  
12 benefits from telehealth delivery of the intervention, with the majority expressing preference for  
13  
14 telehealth over face-to-face interventions. They appreciated the personable, bidirectional  
15  
16 conversation of the telephone calls. The degree of usefulness of text messages was rated variably by  
17  
18 different participants, although no participants described the content or delivery of text messages  
19  
20 negatively. Messages that were perceived to be personalized were preferred for both calls and text  
21  
22 messages. Participants felt that receiving information via more than one delivery mode was helpful  
23  
24 for making diet changes. Some participants discussed challenges which were not addressed by the  
25  
26 ENTICE-CKD intervention, such as participants not being easily able to implement routine dietary  
27  
28 behaviors whilst travelling, or those lacking social support outside of the program.  
29  
30  
31  
32  
33  
34  
35  
36  
37  
38  
39  
40  
41  
42  
43  
44  
45  
46  
47  
48  
49  
50  
51  
52  
53  
54  
55  
56  
57  
58  
59  
60

## DISCUSSION

This mixed methods process evaluation study within a randomized controlled trial evaluated the feasibility and acceptability of the ENTICE-CKD telehealth coaching program to promote healthy eating among people with moderate CKD. The ENTICE-CKD program was a feasible intervention that was delivered according to protocol and enabled participant adherence. The tailored telephone calls and text messages were acceptable to participants in this pilot. In contrast, the acceptability varied for those in the non-tailored education-only text message (control) group.

The successful recruitment and retention of participants enrolled in the ENTICE trial demonstrated feasibility. Although it is important to consider the trial only had a 35% recruitment rate, the feasibility was strengthened by the successful recruitment in the anticipated six-month recruitment period and very low attrition rate (5%) at six-months. Attrition is a common problem in studies of self-management in CKD, which is reported as between 11 to 39%, and which reduces the certainty of findings, particularly given the often underpowered sample sizes of trials of lifestyle interventions in CKD.<sup>29</sup>

The intensive coaching intervention had a high call completion rate (90%) and high intervention adherence. This is similar to the 90% call completion rates reported in other telehealth studies in weight management,<sup>30</sup> breast cancer,<sup>31</sup> younger adults in the general population,<sup>32</sup> and CKD studies.<sup>33</sup> A study involving 436 participants with CKD in the UK, who received a combination of interactive web-based resources and telephone follow-up demonstrated successful recruitment, retention and intervention satisfaction.<sup>33</sup> There was no specific dietary education provided to participants in that study, however the community support intervention, provided through a workbook, online portal, and telephone follow-up demonstrated a 69% recruitment rate, and had 85% retention at the six-month follow up. Participants reported over 80% usefulness for the workbook, 62% for the telephone calls and 23% for the interactive website.<sup>33</sup> Considering the

1 limited evidence on lifestyle interventions in CKD specifically, the findings from this trial support  
2 the feasibility of using telehealth coaching to support dietary self-management of CKD.  
3  
4  
5  
6  
7

8 The ENTICE-CKD program made participants feel supported and motivated for dietary self-  
9 management. However, this was more strongly indicated by participants who received the tailored  
10 intervention program, as opposed to the control group who received non-tailored education-only  
11 text messages. These results suggest that a tailored approach to text messaging may be important to  
12 people with CKD, as it may facilitate the support and regular interaction for dietary changes.<sup>7</sup>  
13  
14 Participants felt that the frequent contact via calls and text messages reinforced rapport and built a  
15 supportive relationship between participant and coach, which in turn, enabled stronger social  
16 accountability and progressive dietary change.  
17  
18  
19  
20  
21  
22  
23  
24  
25  
26

27 Overall, there is limited evidence on the acceptability of telehealth dietary interventions in CKD.<sup>34</sup>  
28  
29 A pilot study in 47 CKD participants demonstrated over 80% user adherence and satisfaction with a  
30 smart-phone self-management support program to support the self-monitoring of blood pressure,  
31 medications, symptom recognition, and biochemistry.<sup>35</sup> In contrast, another study found that text-  
32 message based interventions were the least preferred telehealth intervention for medication  
33 monitoring by CKD participants, compared with web-based or personal digital assistant-based  
34 applications.<sup>36</sup> The Effects of Sodium Modification on Outcome (ESMO) study, a three-month self-  
35 management intervention in 138 adults with CKD which provided one-to-one sessions and  
36 telephone support, demonstrated relatively high (63%) satisfaction from participants. It has been  
37 postulated that a key factor for the high acceptability of the ESMO intervention was the patient-  
38 engagement utilized in the design of the trial.<sup>37</sup> This was an approach also taken in the ENTICE-  
39 CKD study. We have previously found that patients with CKD have been confused by dietary  
40 advice and need more frequent contact to support dietary change.<sup>9</sup> They were willing to participate  
41 in telephone calls and receive text messages, as these were viewed within their comfort zone and  
42  
43  
44  
45  
46  
47  
48  
49  
50  
51  
52  
53  
54  
55  
56  
57  
58  
59  
60

1 levels of digital literacy,<sup>9</sup> but also raised concerns about the credibility, safety, and lack of  
2 personalization in mobile apps and internet modalities. The ENTICE-CKD program was developed  
3 from the key results in this focus group study, which assured a patient-centered approach.<sup>38</sup>  
4  
5  
6  
7  
8  
9

10 Previous thematic synthesis has shown that people with CKD experience many challenges in  
11 relation to achieving their dietary and fluid recommendations. People express a preference for  
12 regular coaching, feedback and monitoring to help them understand dietary information and become  
13 confident in their ability to self-monitor and manage such changes.<sup>7</sup> The ENTICE-CKD  
14 intervention fostered incremental dietary change advice, where each call was dedicated to an  
15 individual topic, as well as being tailored and flexible for participants' goals for change. These  
16 attributes may also explain the difference observed in the acceptability compared to the non-tailored  
17 education only (control) intervention.  
18  
19  
20  
21  
22  
23  
24  
25  
26  
27  
28  
29

30 There are limitations to this study. As we had a 35% recruitment rate, the feasibility and  
31 acceptability only relate to the participants enrolled in this pilot, thus the feasibility for the uptake of  
32 the program in clinical practice is uncertain. Furthermore, the baseline health literacy was 'good' in  
33 over 90 percent of our participants, which is likely greater than the health literacy of the wider CKD  
34 population,<sup>39</sup> therefore the generalizability of the results to people with lower health literacy is  
35 uncertain. We also acknowledge that we captured the individual participant adherence to the  
36 intervention using qualitative methods rather than validated surveys. However, given the primary  
37 outcome of feasibility, qualitative methods were used to minimize the over-use of self-report  
38 surveys and participant burden and this was an exploratory measure of intervention adherence only.  
39 Using this method, we were able to capture to reasons for adherence (and non-adherence). We also  
40 did not recruit children into the ENTICE-CKD study, so our results are not generalizable to children  
41 with CKD. Finally, we did not interview participants in the non-tailored education-only (control)  
42  
43  
44  
45  
46  
47  
48  
49  
50  
51  
52  
53  
54  
55  
56  
57  
58  
59  
60

1 group, and thus could not ascertain the reasons for lower acceptability compared with the  
2  
3 intervention group.  
4  
5  
6  
7

8 In conclusion, the ENTICE-CKD dietary coaching program is a feasible and acceptable intervention  
9  
10 for adults with stage 3-4 CKD. The program facilitated self-monitoring and encouraged the  
11  
12 adoption of goal setting throughout the intensive coaching period. Findings from this study are  
13  
14 promising for the use of telehealth to modify dietary practices in future clinical practice and  
15  
16 research. However, longer-term studies are needed to determine the safety, clinical effectiveness,  
17  
18 and sustainability before the wider implementation of the ENTICE-CKD program is appropriate.  
19  
20 This process evaluation can be used by clinicians to inform frequent and structured contact through  
21  
22 telephone-based and text message platforms to support the complex dietary self-management  
23  
24 required for people with CKD.  
25  
26  
27  
28  
29  
30  
31  
32  
33  
34  
35  
36  
37  
38  
39  
40  
41  
42  
43  
44  
45  
46  
47  
48  
49  
50  
51  
52  
53  
54  
55  
56  
57  
58  
59  
60



**REFERENCES**

1. Bello AK, Levin A, Tonelli M, et al. Assessment of global kidney health care status. *Journal of the American Medical Association*. 2017;317(18):1864-1881.
2. Steiber AL. Chronic kidney disease: considerations for nutrition interventions. *JPEN J Parenter Enteral Nutr*. 2014;38(4):418-426.
3. Ash S, Campbell KL, Bogard J, Millichamp A. Nutrition prescription to achieve positive outcomes in chronic kidney disease: a systematic review. *Nutrients*. 2014;6(1):416-451.
4. Kelly JT, Rossi M, Johnson DW, Campbell KL. Beyond sodium, phosphate and potassium: Potential dietary interventions in kidney disease. *Semin Dialysis*. 2017;30(3):197-202.
5. Kelly JT, Palmer SC, Wai SN, et al. Healthy dietary patterns and risk of mortality and ESRD in CKD: A meta-analysis of cohort studies. *Clin J Am Soc Nephrol*. 2017;12(2):272-279.
6. Wai SN, Kelly JT, Johnson DW, Campbell KL. Dietary patterns and clinical outcomes in chronic kidney disease: The CKD.QLD nutrition study. *J Ren Nutr*. 2017;27(3):175-182.
7. Palmer SC, Hanson CS, Craig JC, et al. Dietary and fluid restrictions in CKD: A thematic synthesis of patient views from qualitative studies. *American Journal of Kidney Diseases*. 2014;65(4):559-573.
8. Hand RK, Steiber A, Burrowes J. Renal dietitians lack time and resources to follow the NKF KDOQI guidelines for frequency and method of diet assessment: results of a survey. *Journal of Renal Nutrition*. 2013;23(6):445-449.
9. Kelly JT, Campbell KL, Hoffmann T, Reidlinger DP. Patient experiences of dietary management in chronic kidney disease: a focus group study. *Journal of Renal Nutrition*. 2017.
10. Kelly J, Reidlinger D, Hoffman T, Campbell K. Telehealth methods to deliver dietary interventions in adults with chronic disease: a systematic review and meta-analysis. In:2016.

11. Beall RF, Baskerville N, Golfam M, Saeed S, Little J. Modes of delivery in preventive intervention studies: a rapid review. *Eur J Clin Invest*. 2014;44(7):688-696.
12. Desroches S, Lapointe A, Ratte S, Gravel K, Legare F, Turcotte S. Interventions to enhance adherence to dietary advice for preventing and managing chronic diseases in adults. *Cochrane Database of Systematic Reviews*. 2013;2:Cd008722.
13. Spark CL, Fjeldsoe SB, Eakin GE, Reeves MM. Efficacy of a text message-delivered extended contact intervention on maintenance of weight loss, physical activity, and dietary behavior change. *JMIR mHealth uHealth*. 2015;3(3):e88.
14. Fjeldsoe B, Neuhaus M, Winkler E, Eakin E. Systematic review of maintenance of behavior change following physical activity and dietary interventions. *Health psychology : official journal of the Division of Health Psychology, American Psychological Association*. 2011;30(1):99.
15. Hall AK, Cole-Lewis H, Bernhardt JM. Mobile text messaging for health: a systematic review of reviews. *Annu Rev Public Health*. 2015;36:393.
16. Eldridge SM, Chan CL, Campbell MJ, et al. CONSORT 2010 statement: extension to randomised pilot and feasibility trials. *Pilot Feasibility Stud*. 2016;2(1):64.
17. Bandura A. *Social foundations of thought and action: A social cognitive theory*. Prentice-Hall, Inc; 1986.
18. NHMRC. Australian Dietary Guidelines. In. Canberra: National Health and Medical Research Council, Department of Health and Ageing; 2013.
19. Australian Government Department of Health. Australia's physical activity and sedentary behaviour guidelines for adults (18-64 years). In: Health Do, ed: Commonwealth of Australia,; 2014.
20. Whitlock EP, Orleans CT, Pender N, Allan J. Evaluating primary care behavioral counseling interventions: An evidence-based approach. *Am J Prev Med*. 2002;22(4):267-284.
21. *Microsoft Excel* [computer program]. Version 14.4.52011.

- 1  
2  
3  
4  
5  
6  
7  
8  
9  
10  
11  
12  
13  
14  
15  
16  
17  
18  
19  
20  
21  
22  
23  
24  
25  
26  
27  
28  
29  
30  
31  
32  
33  
34  
35  
36  
37  
38  
39  
40  
41  
42  
43  
44  
45  
46  
47  
48  
49  
50  
51  
52  
53  
54  
55  
56  
57  
58  
59  
60
22. Fjeldsoe BS, Goode AD, Phongsavan P, et al. Evaluating the maintenance of lifestyle changes in a randomized controlled trial of the 'get healthy, stay healthy' program. *JMIR mHealth and uHealth*. 2016;4(2):e42.
  23. ABS. *Census of population and housing: Socio-economic indexes for areas (SEIFA), Australia, 2011*. Australian Bureau of Statistics 2015.
  24. Morris NS, MacLean CD, Chew LD, Littenberg B. The single item literacy screener: Evaluation of a brief instrument to identify limited reading ability. *BMC family practice*. 2006;7:21-21.
  25. Lancaster GA, Dodd S, Williamson PR. Design and analysis of pilot studies: recommendations for good practice. *J Eval Clin Pract*. 2004;10(2):307-312.
  26. Chow CK, Redfern J, Hillis GS, et al. Effect of lifestyle-focused text messaging on risk factor modification in patients with coronary heart disease: a randomized clinical trial. *Journal of the American Medical Association*. 2015;314(12):1255-1263 1259p.
  27. Vaismoradi M, Turunen H, Bondas T. Content analysis and thematic analysis: Implications for conducting a qualitative descriptive study. *Nurs Health Sci*. 2013;15(3):398-405.
  28. *Microsoft Word* [computer program]. Version 14.4.52011.
  29. Welch JL, Johnson M, Zimmerman L, Russell CL, Perkins SM, Decker BS. Self-management interventions in stages 1-4 chronic kidney disease: an integrative review. *West J Nurs Res*. 2015;37(5):652-678.
  30. Whelan ME, Goode AD, Eakin EG, et al. Feasibility, effectiveness and cost-effectiveness of a telephone-based weight loss program delivered via a hospital outpatient setting. *Translational behavioral medicine*. 2016;6(3):386.
  31. Spark LC, Fjeldsoe BS, Eakin EG, Reeves MM. Efficacy of a text message-delivered extended contact intervention on maintenance of weight loss, physical activity, and dietary behavior change. *JMIR mHealth and uHealth*. 2015;3(3):e88.

- 1  
2  
3  
4  
5  
6  
7  
8  
9  
10  
11  
12  
13  
14  
15  
16  
17  
18  
19  
20  
21  
22  
23  
24  
25  
26  
27  
28  
29  
30  
31  
32  
33  
34  
35  
36  
37  
38  
39  
40  
41  
42  
43  
44  
45  
46  
47  
48  
49  
50  
51  
52  
53  
54  
55  
56  
57  
58  
59  
60
32. Partridge SR, Allman-Farinelli M, McGeechan K, et al. Process evaluation of TXT2BFiT: a multi-component mHealth randomised controlled trial to prevent weight gain in young adults. *Int J Behav Nutr Phys Act.* 2016;13(1):7.
33. Blakeman T, Blickem C, Kennedy A, et al. Effect of information and telephone-guided access to community support for people with chronic kidney disease: Randomised controlled trial. *Plos One.* 2014;9(10):e109135.
34. Tuot DS, Boulware LE. Telehealth applications to enhance CKD knowledge and awareness among patients and providers. *Adv Chronic Kidney Dis.* 2017;24(1):39-45.
35. Ong SW, Jassal SV, Miller JA, et al. Integrating a smartphone-based self-management system into usual care of advanced CKD. *Clin J Am Soc Nephrol.* 2016;11(6):1054-1062.
36. Diamantidis CJ, Zuckerman M, Fink W, Aggarwal S, Prakash D, Fink JC. Usability testing and acceptance of an electronic medication inquiry system for CKD patients. *Am J Kid Dis.* 2013;61(4):644-646.
37. Campbell KL, Palmer SC, Johnson DW. Improving nutrition research in nephrology: an appetite for change. *Am J Kid Dis.* 2017;69(5):558-560.
38. Domecq JP, Prutsky G, Elraiyah T, et al. Patient engagement in research: a systematic review. *BMC health services research.* 2014;14(1):89.
39. Wright Nunes JA, Wallston KA, Eden SK, Shintani AK, Ikizler TA, Cavanaugh KL. Associations among perceived and objective disease knowledge and satisfaction with physician communication in patients with chronic kidney disease. *Kidney Int.* 2011;80(12):1344-1351.

1  
2  
3  
4  
5  
6  
7  
8  
9  
10  
11  
12  
13  
14  
15  
16  
17  
18  
19  
20  
21  
22  
23  
24  
25  
26  
27  
28  
29  
30  
31  
32  
33  
34  
35  
36  
37  
38  
39  
40  
41  
42  
43  
44  
45  
46  
47  
48  
49  
50  
51  
52  
53  
54  
55  
56  
57  
58  
59  
60

## LIST OF TABLES

**Table 1.** Demographics of participants whom completed the six month ENTICE-CKD pilot study.

**Table 2.** Delivery and response of fortnightly telephone calls and text messages in ENTICE-CKD.

**Table 3.** Participant adherence to the ENTICE-CKD intervention. Data are presented as *n (%)*.

**Table 4.** Utility and acceptability of ENTICE-CKD text messages by participant group.

**Table 5.** Acceptability and feasibility of ENTICE-CKD program at completion of phase 1 (intervention group): qualitative content analysis of semi-structured interviews (n=21).

1  
2  
3  
4  
5  
6  
7  
8  
9  
10  
11  
12  
13  
14  
15  
16  
17  
18  
19  
20  
21  
22  
23  
24  
25  
26  
27  
28  
29  
30  
31  
32  
33  
34  
35  
36  
37  
38  
39  
40  
41  
42  
43  
44  
45  
46  
47  
48  
49  
50  
51  
52  
53  
54  
55  
56  
57  
58  
59  
60

## LIST OF TABLES FIGURES

**Figure 1.** Consort flow diagram showing the flow of participants through the ENTICE-CKD study.

For peer review only

**Table 1.** Demographics of participants whom completed the six month ENTICE-CKD pilot study.

| <b>Characteristic</b>                    | <b>Intervention group (n=41)</b> | <b>Control group (n=39)</b> |
|------------------------------------------|----------------------------------|-----------------------------|
| <b>Male, n (%)</b>                       | <b>26 (63%)</b>                  | <b>25 (64%)</b>             |
| <b>Age (years)</b>                       | <b>62.0 ± 12.0</b>               | <b>61.1 ± 13.3</b>          |
| <b>Stage of chronic kidney disease</b>   |                                  |                             |
| 3a                                       | 10 (25%)                         | 15 (38%)                    |
| 3b                                       | 19 (46%)                         | 16 (41%)                    |
| 4                                        | 12 (29%)                         | 8 (21%)                     |
| <b>Body Mass Index, kg/m<sup>2</sup></b> | <b>33.4 ± 6.7</b>                | <b>31.0 ± 6.4</b>           |
| <b>Hypertension</b>                      | <b>34 (83%)</b>                  | <b>31 (80%)</b>             |
| <b>Diabetes</b>                          | <b>15 (37%)</b>                  | <b>16 (41%)</b>             |
| <b>Active smoker status</b>              | <b>21 (51%)</b>                  | <b>16 (41%)</b>             |
| <b>Ethnicity</b>                         |                                  |                             |
| Asian                                    | 2 (5%)                           | 1 (3%)                      |
| Caucasian/European                       | 37 (91%)                         | 32 (82%)                    |
| Indigenous                               | 1 (2%)                           | 0                           |
| Other                                    | 1 (2%)                           | 6 (15%)                     |
| <b>Education</b>                         |                                  |                             |
| Lower than 10 <sup>th</sup> grade        | 17 (42%)                         | 12 (32%)                    |
| Up to 12 <sup>th</sup> grade             | 4 (10%)                          | 10 (26%)                    |
| Tertiary educated                        | 20 (47%)                         | 16 (41%)                    |
| <b>Socio-economic status</b>             |                                  |                             |
| High                                     | 27 (66%)                         | 25 (64%)                    |
| <b>Health Literacy</b>                   |                                  |                             |
| Good                                     | 37 (90%)                         | 36 (92%)                    |

**Table 2.** Delivery and response of fortnightly telephone calls and text messages in ENTICE-CKD.

|                                                 | Intervention group |            | Control group |
|-------------------------------------------------|--------------------|------------|---------------|
|                                                 | Phase 1            | Phase 2    | Phase 2       |
| <b>TELEPHONE CALLS</b>                          |                    |            |               |
| Planned                                         | 234                | -          | -             |
| Actual                                          | 225                | -          | -             |
| Call attempts                                   | 290                | -          | -             |
| Missed calls, n (%)                             | 9 (3)              | -          | -             |
| Duration of initial calls, mins (mean± SD)      | 45±10              | -          | -             |
| Duration of follow up calls, mins (mean ± SD)   | 24±10              | -          | -             |
| Call scheduling text messages outgoing          | 245                | 57         | 0             |
| <b>TEXT MESSAGES – outgoing</b>                 |                    |            |               |
| Total intervention texts sent, per fortnight    | 1371               | 1980       | 1634          |
| Educational <sup>a</sup> , median(range)        | 2(0-6)             | 4(0-8)     | 6(0-13)       |
| Goal check <sup>b</sup> , median(range)         | 2(0-4)             | 3(0-5)     | -             |
| Self-monitoring <sup>c</sup> , median(range)    | 0(0-2)             | 2(0-5)     | -             |
| <b>TEXT MESSAGES – incoming</b>                 |                    |            |               |
| Total text responses                            | 437                | 608        | 55            |
| Recognized goal check responses, n (%)          | 174 (39.8)         | 226 (37.2) | 0             |
| Unrecognized responses                          | 263                | 382        | 55            |
| Requiring tailored text reply from coach, n (%) | 7 (2.7)            | 18 (4.7)   | 2 (3.6)       |

<sup>a</sup> Outcome expectations (providing information on consequence)

<sup>b</sup> Self-regulation

<sup>c</sup> Self-regulation (facilitate planned behavior change)



**Table 3.** Participant adherence to the ENTICE intervention<sup>a</sup>.

| Adherence                        | Call 1               | Call 2           | Call 3-6   |
|----------------------------------|----------------------|------------------|------------|
| Total planned calls              | 39                   | 39               | 156        |
| Calls delivered, n (%)           | 39 (100)             | 38 (97)          | 148 (95)   |
| Number of missed calls, n (%)    | 0                    | 1 (3)            | 8 (5)      |
| Due to withdrawal from trial     |                      |                  | 2 (1)      |
| Due to travel                    |                      |                  | 2 (1)      |
| Other <sup>b</sup>               |                      | 1 (3)            | 4 (3)      |
| Goal setting, n (%)              | 38 (100)             | 10 (26)          | 23 (61)    |
| 1 goal                           | 2 (5)                | 8 (21)           | 12 (32)    |
| 2 goals                          | 36 (95)              | 2 (5)            | 7 (18)     |
| 3 goals                          | N/A <sup>c</sup>     | N/A <sup>c</sup> | 1 (3)      |
| 4 goals                          | N/A <sup>c</sup>     | N/A <sup>c</sup> | 3 (8)      |
| Self-monitoring, n (%)           | 22/38 (58)           | 29/38 (76%)      | 29/38 (76) |
| Implementation intentions, n (%) |                      |                  |            |
| (%)                              | 14 (37) <sup>d</sup> | 31 (82)          | 37 (97)    |
| Yes                              | 24 (63) <sup>d</sup> | 7 (18)           | 1 (3)      |
| No                               |                      |                  |            |

<sup>a</sup> – Data are presented as *n* (%).

<sup>b</sup> – 1 participant decided to get tailored text messages only following call 1

<sup>c</sup> - In each call only 2 goals could be set or updated.

<sup>d</sup> - Implementation intentions were not expected to be evident in the first call

**Table 4.** Utility and acceptability of ENTICE-CKD text messages by participant group<sup>a</sup>.

| Characteristic                                     | Tailored text messages | Non-tailored text-messages |
|----------------------------------------------------|------------------------|----------------------------|
| <b>Usefulness and understanding</b>                |                        |                            |
| Q1 - Useful in supporting dietary change           | 100%                   | 69%**                      |
| Q2 - Messages were easy to understand              | 100%                   | 100%                       |
| <b>Influence on motivation and behavior change</b> |                        |                            |
| Q3 - Messages motivated change                     | 75%                    | 50%**                      |
| Q4 - Healthier diet due to messages                | 81%                    | 61%                        |
| Q5 - Exercise increased due to messages            | 38%                    | 33%                        |
| <b>Message saving and sharing</b>                  |                        |                            |
| Q6 - Percent of messages read                      | 100%                   | 100%                       |
| Q7 - Saved messages                                | 81%                    | 72%                        |
| Q8 - Shared messages                               | 56%                    | 67%                        |
|                                                    | Family member          | 71%                        |
|                                                    | Friend                 | 12%                        |
|                                                    | Health provider        | 12%                        |
| <b>Appropriate message characteristics</b>         |                        |                            |
| Q9 - Suitable language                             | 100%                   | 100%                       |
| Q10 - Texts were not too regular                   | 94%                    | 86%                        |
| Q11 - Program length (six months)                  | 88%                    | 78%                        |
| Q12 - Appropriate time of the day/night            | 100%                   | 94%                        |

<sup>a</sup> - Response rate for this survey was 73 out of 80 participants (91%), tailored text messages (n=43), non-tailored text messages (n=39).

\*\* - p<0.01 between groups

**Table 5.** Acceptability and feasibility of ENTICE-CKD program at completion of phase 1 (intervention group): qualitative content analysis of semi-structured interviews (n=21)

| Category                                      | Attributes                                                                                              | Quote                                                                                                                                                                                                                                                                                                                           |
|-----------------------------------------------|---------------------------------------------------------------------------------------------------------|---------------------------------------------------------------------------------------------------------------------------------------------------------------------------------------------------------------------------------------------------------------------------------------------------------------------------------|
| <b>Acceptability</b>                          |                                                                                                         |                                                                                                                                                                                                                                                                                                                                 |
| Acceptable alternative to clinic              | - Overcomes clinic wait times, transport logistics                                                      | <i>“At home I’m more relaxed and I have the book in front of me and I was able to jot down anything that was important, if I was at the hospital there’s so many people around and you don’t feel very relaxed, you feel like everyone is listening to your conversation, so you don’t say personal information”</i> Female, 69 |
|                                               | - Flexibility of phone call appointment times                                                           |                                                                                                                                                                                                                                                                                                                                 |
|                                               | - Preferred talking from a familiar environment and not feeling rushed                                  |                                                                                                                                                                                                                                                                                                                                 |
| Preference for voice communication            | - No identified disadvantages of telehealth communication vs face-to-face                               | <i>“I found the calls better than the texts ... they were more personable and kept me on track”</i> Female, 68                                                                                                                                                                                                                  |
|                                               | - Building rapport with coach                                                                           |                                                                                                                                                                                                                                                                                                                                 |
| Regular contact via text message              | - More benefit from voice calls                                                                         | <i>“We solved a lot of my little issues, and it’s given me a lot better understanding, and you know the more you think about it and communicate about it, ah the better it is”</i> Male, 71                                                                                                                                     |
|                                               | - Frequency of fortnightly phone calls                                                                  |                                                                                                                                                                                                                                                                                                                                 |
| Personalized messages valued                  | - Text messages were an acceptable mode of communicating information                                    | <i>“It’s given me simple tasks, simple methods, or methodologies, to improve the situation, and they’re not a whole lot of gobbledygook, just basic stuff that we can understand.”</i> Male, 65                                                                                                                                 |
|                                               | - Preference for receiving text messages with personal encouragement and general tips                   |                                                                                                                                                                                                                                                                                                                                 |
|                                               | - All text messages were acceptable                                                                     |                                                                                                                                                                                                                                                                                                                                 |
| Feasibility Program integrated into lifestyle | - Health professional expertise                                                                         | <i>“As long as you’re getting information backwards and forwards, that’s the more important thing than the length of the call, it’s what you’re getting out of it”</i> Male, 78                                                                                                                                                 |
|                                               | - Usefulness of coordinated nutrition advice                                                            |                                                                                                                                                                                                                                                                                                                                 |
|                                               | - Removal of multiple conflicting nutrition recommendations                                             |                                                                                                                                                                                                                                                                                                                                 |
| Diverse delivery modes                        | - Length of phone calls easily accommodated                                                             | <i>“You’ve got to eat these foods, food groups and that, but you don’t actually know the right quantities ... this program shows it to you and it’s like, it’s teaching someone how to walk again”</i> Male, 46                                                                                                                 |
|                                               | - 12-week telephone intervention enough time for change                                                 |                                                                                                                                                                                                                                                                                                                                 |
|                                               | - Self-monitoring the behavior of choice                                                                |                                                                                                                                                                                                                                                                                                                                 |
|                                               | - Active learning from a range of understandable delivery modes                                         |                                                                                                                                                                                                                                                                                                                                 |
|                                               | - Hard copy workbook as reference tool                                                                  | <i>“The book I think was brilliant, because you’ve got that to go back through all the time, well any time you’re doubtful you’ve got thoughts, you just look at the book, I did, I still do it”</i> Male, 64                                                                                                                   |
|                                               | - Receiving explanations develops understanding and awareness of reasons for dietary change             |                                                                                                                                                                                                                                                                                                                                 |
|                                               | - Quantifiable dietary recommendations (food groups, “good vs bad” foods, portion sizes, sodium levels) |                                                                                                                                                                                                                                                                                                                                 |

| Category                                | Attributes                                                                                                                                                                                                                                                                                                         | Quote                                                                                                                                                                                                                                                                                                                                                |
|-----------------------------------------|--------------------------------------------------------------------------------------------------------------------------------------------------------------------------------------------------------------------------------------------------------------------------------------------------------------------|------------------------------------------------------------------------------------------------------------------------------------------------------------------------------------------------------------------------------------------------------------------------------------------------------------------------------------------------------|
| Social accountability                   | <ul style="list-style-type: none"> <li>- Supportive relationship with one coach allows progressive dietary change</li> <li>- Frequent reminders and reinforcing goals</li> <li>- Interaction with coach via text messages</li> </ul>                                                                               | <p><i>"If I didn't have the phone calls from [my coach] once a fortnight I probably wouldn't have taken it as serious as I have"</i> Male, 65</p> <p><i>"The support, even just texting and that, it's still, you know someone's doing it. It's, it just makes you feel better as a person, to know someone cares"</i> Male, 64</p>                  |
| Responding to dietary advice            | <ul style="list-style-type: none"> <li>- Small changes at a time</li> <li>- Practical strategies, manipulating environment to support behaviors, skill development (label reading)</li> <li>- Setting goals and finding satisfaction in quantifiable outcomes (e.g. portion sizes, food group servings)</li> </ul> | <p><i>"The program is delivered in segments, you're just having a bit of information at a time, so it's not overwhelming"</i> Female, 68</p> <p><i>"I was astounded at the salt content of it all, so when I read that I immediately stopped all salt that I put on my plate ... I've not had salt since, so that was 3 months ago"</i> Male, 65</p> |
| Infeasible elements beyond intervention | <ul style="list-style-type: none"> <li>- Physical comorbidities a barrier for lifestyle component of program</li> <li>- Lack of support from others with poor understanding or low interest</li> <li>- Unstable or unsupportive environment for creating healthy habits</li> </ul>                                 | <p><i>"I have just been moving around a lot more and not in a stable environment of being in familiar surroundings, being unable to replicate ... the menus ... due to my transient nature of where I am presently"</i> Male, 46</p>                                                                                                                 |

1  
2  
3  
4  
5  
6  
7  
8  
9  
10  
11  
12  
13  
14  
15  
16  
17  
18  
19  
20  
21  
22  
23  
24  
25  
26  
27  
28  
29  
30  
31  
32  
33  
34  
35  
36  
37  
38  
39  
40  
41

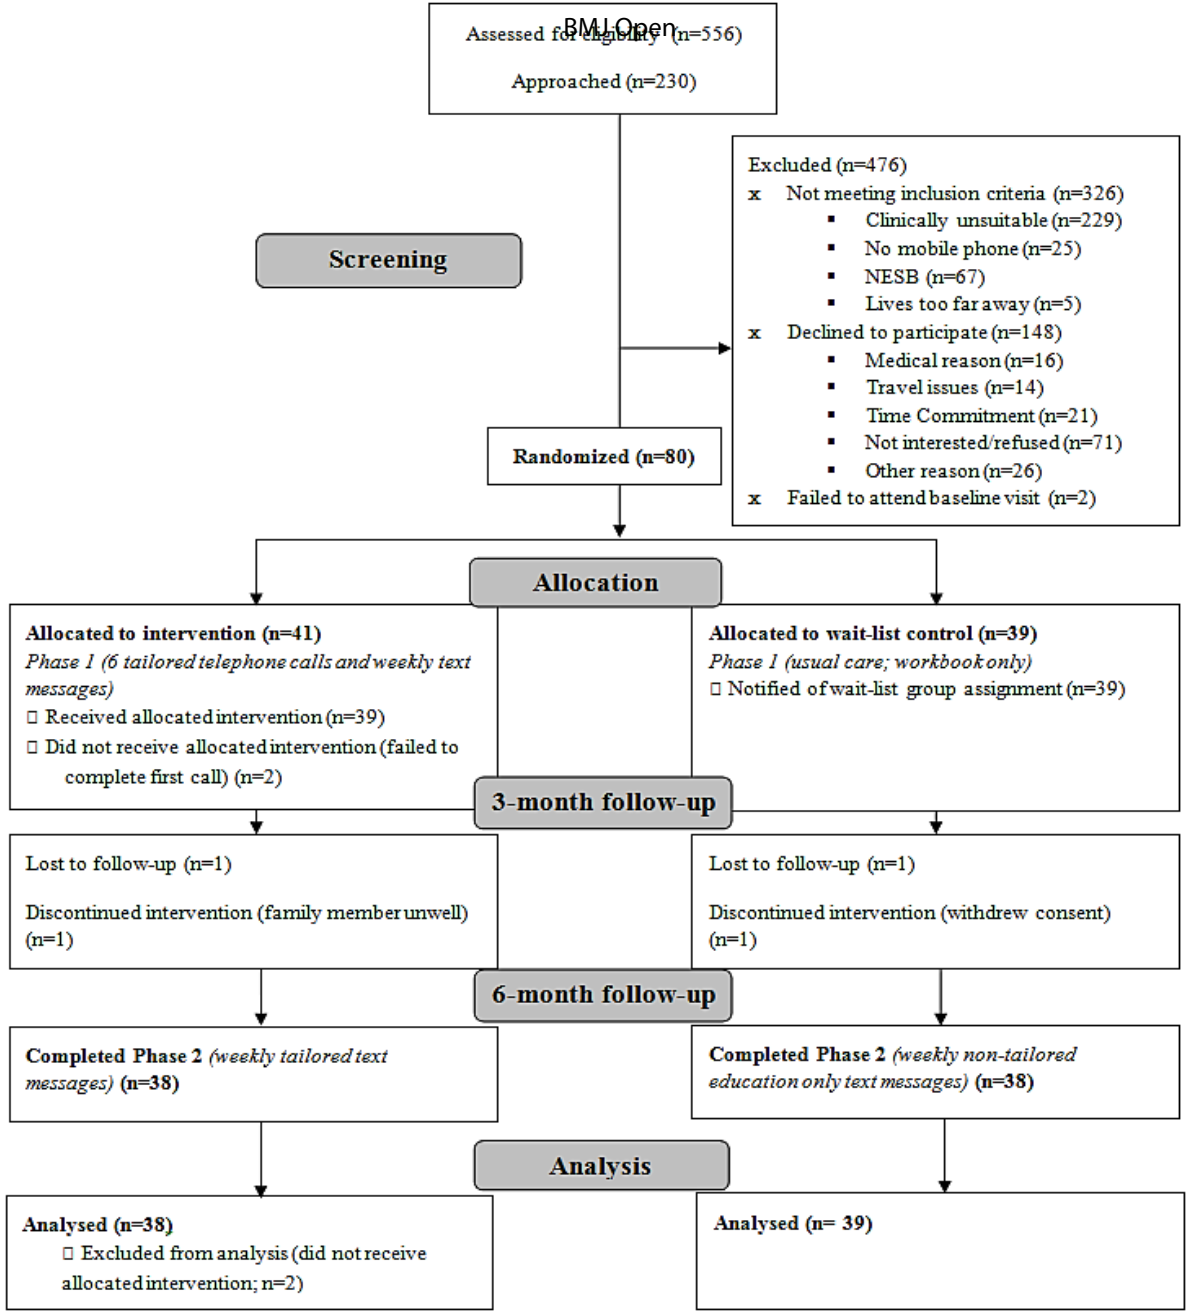

For peer review only - <http://bmjopen.bmj.com/site/about/guidelines.xhtml>

**Figure 1.** Consort flow diagram showing the flow of participants through the ENTICE-CKD study.

## SUPPLEMENTARY MATERIALS

**Supplementary Table 1.** Dietary targets encouraged in the ENTICE-CKD intervention workbook, telephone calls and text messages<sup>1,2</sup>.

| Food group                  | Dietary target (serves/day) | Considerations                                 |
|-----------------------------|-----------------------------|------------------------------------------------|
| Grains/cereals              | 3-6 (>50% whole grain)      | Replacing refined carbohydrates for wholegrain |
| Vegetables and fruit        | 5-7                         | Low potassium alternatives as appropriate      |
| Low fat dairy               | 2                           | 250mL milk, 40g cheese, 200g yoghurt           |
| Lean meat, poultry and fish | <2 (130-200g)               | Modified for protein (aiming for 1.0 g/kg/day) |
| Fats and oils               | 20 to 40g                   | Emphasise healthy oils                         |
| Dietary sodium              | <100mmol/day (6g salt)      | Replace takeaway and processed foods for fresh |
| Added sugars                | <10% total calorie intake   | food and healthy cooking methods               |
| Discretionary choices       | <2                          | Limit where possible                           |

Abbreviations – g: grams, kg: kilogram, mL: millilitre.

**Supplementary Table 2.** Text messaging framework and related social cognitive theory constructs in the six month ENTICE-CKD trial.

| Text message type                          | SCT construct <sup>a</sup>                                                        | Example text <sup>a</sup>                                                                                                                   | Schedule of Text Messages       |                  |                            |                  |
|--------------------------------------------|-----------------------------------------------------------------------------------|---------------------------------------------------------------------------------------------------------------------------------------------|---------------------------------|------------------|----------------------------|------------------|
|                                            |                                                                                   |                                                                                                                                             | Intervention group <sup>b</sup> |                  | Control group <sup>b</sup> |                  |
|                                            |                                                                                   |                                                                                                                                             | Phase 1                         | Phase 2          | Phase 1                    | Phase 2          |
| Educational                                | Outcome expectations (providing information on consequence)                       | Dietary fibre intake reduces ur cholesterol levels and controls ur blood sugar. Include wholegrain breads & cereals, fruits & veg regularly | 2-6                             | 1-4              | NA <sup>c</sup>            | 6-8              |
| Self-monitoring                            | Self-regulation<br>Assist with perceived impediments and facilitators of behavior | Hi [name], are you keeping track of ur fruit/vegetable intake every day? Remember ur goal to meet at least 5 serves this week               | 0-2                             | 1-4              | NA                         | NA               |
| Goal check of behavioral goals             | Self-regulation                                                                   | Hi [name], did you reach ur goal to eat 5 fruits/vegetables 4 times this week? Text me back yes or no to let me know                        | 2                               | 2-4              | NA                         | NA               |
| Educational Permutations (Safety protocol) | Low potassium diet                                                                | Choose high fibre, low potassium breakfast cereals. Good choices are Multigrain Weetbix, Rolled Oats, Guardian, Oatbritz, Special K         | 0-2 <sup>d</sup>                | 0-2 <sup>d</sup> | NA                         | 0-2 <sup>d</sup> |

<sup>a</sup> Abbreviations: SCT: Social Cognitive Theory; Each text message utilized common abbreviations to reduce character counts. For example 'ur' refers to 'your', 'u' refers to 'you'.

<sup>b</sup> Phase 1 was from baseline to three months. Phase 2 was from three months to the six month study end-point

<sup>c</sup> NA = not applicable

<sup>d</sup> Educational permutations were only available for coaches to use if a participant experienced hyperkalaemia or hyperphosphataemia

**Supplement Table 3.** Utility and acceptability questionnaire completed at six months.

| Thinking about the text message component of the ENTICE intervention; please answer the following questions (part A). |                                                                                                                                                                                                                                                                                         |
|-----------------------------------------------------------------------------------------------------------------------|-----------------------------------------------------------------------------------------------------------------------------------------------------------------------------------------------------------------------------------------------------------------------------------------|
| 1.                                                                                                                    | The text messages sent to me were useful in supporting me make a dietary change?<br><input type="radio"/> Strongly agree<br><input type="radio"/> Agree<br><input type="radio"/> Neither agree or disagree<br><input type="radio"/> Disagree<br><input type="radio"/> Strongly disagree |
| 2.                                                                                                                    | The text messages sent to me were easy to understand?<br><input type="radio"/> Strongly agree<br><input type="radio"/> Agree<br><input type="radio"/> Neither agree or disagree<br><input type="radio"/> Disagree<br><input type="radio"/> Strongly disagree                            |
| 3.                                                                                                                    | The text messages sent to me motivated me to change my diet<br><input type="radio"/> Strongly agree<br><input type="radio"/> Agree<br><input type="radio"/> Neither agree or disagree<br><input type="radio"/> Disagree<br><input type="radio"/> Strongly disagree                      |
| 4.                                                                                                                    | The text messages sent to me made me eat healthier?<br><input type="radio"/> Strongly agree<br><input type="radio"/> Agree<br><input type="radio"/> Neither agree or disagree<br><input type="radio"/> Disagree<br><input type="radio"/> Strongly disagree                              |
| 5.                                                                                                                    | The text messages sent to me made me exercise more?<br><input type="radio"/> Strongly agree<br><input type="radio"/> Agree<br><input type="radio"/> Neither agree or disagree<br><input type="radio"/> Disagree<br><input type="radio"/> Strongly disagree                              |
| 6.                                                                                                                    | How many of the text messages sent to you did you read?<br><input type="radio"/> All<br><input type="radio"/> Approximately three quarters<br><input type="radio"/> Approximately one half<br><input type="radio"/> Approximately one quarter<br><input type="radio"/> None             |
| 7.                                                                                                                    | What did you do after receiving the text message?<br><input type="radio"/> Ignore it<br><input type="radio"/> Read and saved<br><input type="radio"/> Read and deleted                                                                                                                  |



Thinking about the text message component of the ENTICE intervention; please answer the following questions (part B)

8. Did you share your text messages with family friends or your health care providers?

No

Yes; (please specify)

Spouse

Other family member

Doctor

Nurse

Other Health Care Professional

9. The text messages sent to me were worded in a suitable language

Yes

No

10. The text messages sent to me were too regular

Yes

No

11. The text message program (over 6 months) was long enough?

Yes

No

12. The text messages sent to me were at an appropriate time of the day/night?

Yes

No

**Supplement Table 4. Semi-structured Interview Schedule.**

| <i>Focus Point</i>                                             | <i>Key questions and prompts</i>                                                                                                                                                                                                                                                                                                                                                                                                                                                                                                                                                                                                                                                                                                                                                                                                                                                                                                                                                                                                                                                                                                                                                                                                                                                                                                                                                                                                                                                                                                                                                                                                                                                                                                                                                                                                                                                                                                 |
|----------------------------------------------------------------|----------------------------------------------------------------------------------------------------------------------------------------------------------------------------------------------------------------------------------------------------------------------------------------------------------------------------------------------------------------------------------------------------------------------------------------------------------------------------------------------------------------------------------------------------------------------------------------------------------------------------------------------------------------------------------------------------------------------------------------------------------------------------------------------------------------------------------------------------------------------------------------------------------------------------------------------------------------------------------------------------------------------------------------------------------------------------------------------------------------------------------------------------------------------------------------------------------------------------------------------------------------------------------------------------------------------------------------------------------------------------------------------------------------------------------------------------------------------------------------------------------------------------------------------------------------------------------------------------------------------------------------------------------------------------------------------------------------------------------------------------------------------------------------------------------------------------------------------------------------------------------------------------------------------------------|
| <i>1. Warm Up, rapport building, experiences</i>               | <p>I'm interested to hear about your story with a kidney condition. Would you be able to tell me about your story from when you first found out, how you felt and your journey up until now?</p> <ul style="list-style-type: none"> <li>- Can you tell me how you felt, or your initial reactions, when you were first diagnosed?</li> <li>- What was your experience with the healthcare system and dietitians before the ENTICE program?</li> </ul> <p>Can you talk me through how you got involved in the program? What happened?</p> <ul style="list-style-type: none"> <li>- How and why did you sign up? (Motivation? Knowledge? Priorities?)</li> <li>- Who influenced your decision to take part in the program? How? Why?</li> <li>- Did your doctor recommend the program? Did they have an influence on your decision to take part? (Support/pressure? Influence of medical professionals?)</li> </ul> <p>What happened after you signed up for the program?</p> <ul style="list-style-type: none"> <li>- Did you meet with a dietitian? How did you find that?</li> </ul>                                                                                                                                                                                                                                                                                                                                                                                                                                                                                                                                                                                                                                                                                                                                                                                                                                            |
| <i>2. Barriers and facilitators of adherence to program</i>    | <p>Before ENTICE, did you have any needs, challenges, concerns about diet? Could you briefly tell me about that?</p> <p>To what degree does the ENTICE program meet your needs or address what you want? How? Why?</p> <p>What do you like most/least about being involved in the program - why?</p> <p>What were some of the things that made the program easy/difficult to take part in?</p> <p>What are your thoughts on being in familiar surroundings while you're talking to [JK/MC]?</p>                                                                                                                                                                                                                                                                                                                                                                                                                                                                                                                                                                                                                                                                                                                                                                                                                                                                                                                                                                                                                                                                                                                                                                                                                                                                                                                                                                                                                                  |
| <i>3. Telehealth delivery methods and frequency of contact</i> | <p>Let's move on to your experiences with the phone calls.</p> <ul style="list-style-type: none"> <li>- What did you expect from the calls and did they meet your expectations?</li> <li>- What are your thoughts on never having seen [JK/MC] and building a relationship with them?</li> <li>- How do you think using the telephone is different to seeing someone in person? Feel any different being in a familiar environment compared to a clinic?</li> <li>- Can you share some things that made the phone calls easier/harder than seeing [JK/MC] in person?</li> <li>- Were you able to make the calls at a suitable time - how?</li> <li>- What do you think about the frequency of the calls? – why?</li> <li>- How did you feel about the length of the calls? Did you feel you were rushed during the calls?</li> <li>- Do you have anything more to add about the phone calls?</li> </ul> <p>Let's talk about the text messages now, what did you think about getting the text messages from [JK/MC]?</p> <ul style="list-style-type: none"> <li>- Can you give me an example of a text message that you liked the most/least?</li> <li>- Do you think the text messages were necessary - why?</li> <li>- What do you think about how frequently you got the text messages? Why?</li> <li>- Do you have anything more to add about the text messages?</li> </ul> <p>You got a workbook at the start of the program.</p> <ul style="list-style-type: none"> <li>- What are your thoughts on the information in the workbook? – why?</li> <li>- Can you give me an example of something from the workbook that had an impact on you? (Why? Motivation? Knowledge?)</li> <li>- Did you have any difficulties understanding the information in the workbook?</li> <li>- Did you show the workbook to anyone? Who? Why? What did they think?</li> <li>- Do you have anything more to add about the workbook?</li> </ul> |
| <i>4. Usability of the program</i>                             | <p>Can you think of an example recommendation that [JK/MC] gave you about your diet or your lifestyle?</p> <ul style="list-style-type: none"> <li>- What are some things that helped you/made it hard for you to follow recommendations? – why?</li> </ul>                                                                                                                                                                                                                                                                                                                                                                                                                                                                                                                                                                                                                                                                                                                                                                                                                                                                                                                                                                                                                                                                                                                                                                                                                                                                                                                                                                                                                                                                                                                                                                                                                                                                       |
| <i>5. Goal setting and self-monitoring</i>                     | <p>What are your thoughts on setting health goals?</p> <ul style="list-style-type: none"> <li>- How do you feel about goal setting?</li> <li>- Can you tell me about your experience with goal setting before the program?</li> <li>- Did you set goals in the program? When? Are you able to tell me about one of your goals?</li> <li>- Do you think ENTICE helped you to achieve your goals - why?</li> </ul> <p>One of the aims of ENTICE is to improve self monitoring –do you know what self-monitoring</p>                                                                                                                                                                                                                                                                                                                                                                                                                                                                                                                                                                                                                                                                                                                                                                                                                                                                                                                                                                                                                                                                                                                                                                                                                                                                                                                                                                                                                |

|                            |                                                                                                                                                                                                                                                                                                                                                                                                                                                                                                                                                                                                                                                                                                                                                                                                                                         |
|----------------------------|-----------------------------------------------------------------------------------------------------------------------------------------------------------------------------------------------------------------------------------------------------------------------------------------------------------------------------------------------------------------------------------------------------------------------------------------------------------------------------------------------------------------------------------------------------------------------------------------------------------------------------------------------------------------------------------------------------------------------------------------------------------------------------------------------------------------------------------------|
|                            | <p>means? (Stuff you'll do without people reminding you, like writing down or taking note of what you eat or how active you've been)</p> <ul style="list-style-type: none"> <li>- Do you find you do that? Why?</li> <li>- What impact do you think the program has had on your self-monitoring? (The way you go about it? How often?)</li> <li>- How confident do you feel with monitoring your diet? Why?</li> </ul>                                                                                                                                                                                                                                                                                                                                                                                                                  |
| 6. <i>Behaviour change</i> | <p>You have made some changes to your lifestyle in order to meet your goals [example]</p> <ul style="list-style-type: none"> <li>- Will these changes be something that you'll continue to do? – how? why?</li> <li>- Can you tell me about your motivation to make changes before the program?</li> <li>- How and why did your motivation change during the program?</li> <li>- How do you feel about keeping motivated after the program?</li> </ul> <p>Do you feel like your daily activities have changed since before the program? How? (Eating behaviour? Purchasing of foods? How physically active you are?)</p>                                                                                                                                                                                                                |
| 7. <i>Experiences</i>      | <ul style="list-style-type: none"> <li>- Did you feel that the recommendations from [JK/MC] were specific to you and nobody else?</li> <li>- Can you give an example of when you felt this way?</li> <li>- Were the recommendations clear? How? Why?</li> <li>- Do you understand why the advice was given to you?</li> <li>- Do you think the program and the telephone sessions were suited to your culture?</li> <li>- Did you share your experiences with the program with anybody else? Family, friends, other health professionals? How? Why? Did you find it helpful?</li> </ul> <p>Imagine you became director of the hospital and you had the power to improve the services for people with kidney disease. What would be the top 2 changes you would make to improve the care and support for people with kidney disease?</p> |
| 8. <i>Closing</i>          | <p>We would like you to help us evaluate the program to help improve it and the difference it makes to patients. Is there anything that you think would be important to mention that we haven't covered?</p>                                                                                                                                                                                                                                                                                                                                                                                                                                                                                                                                                                                                                            |

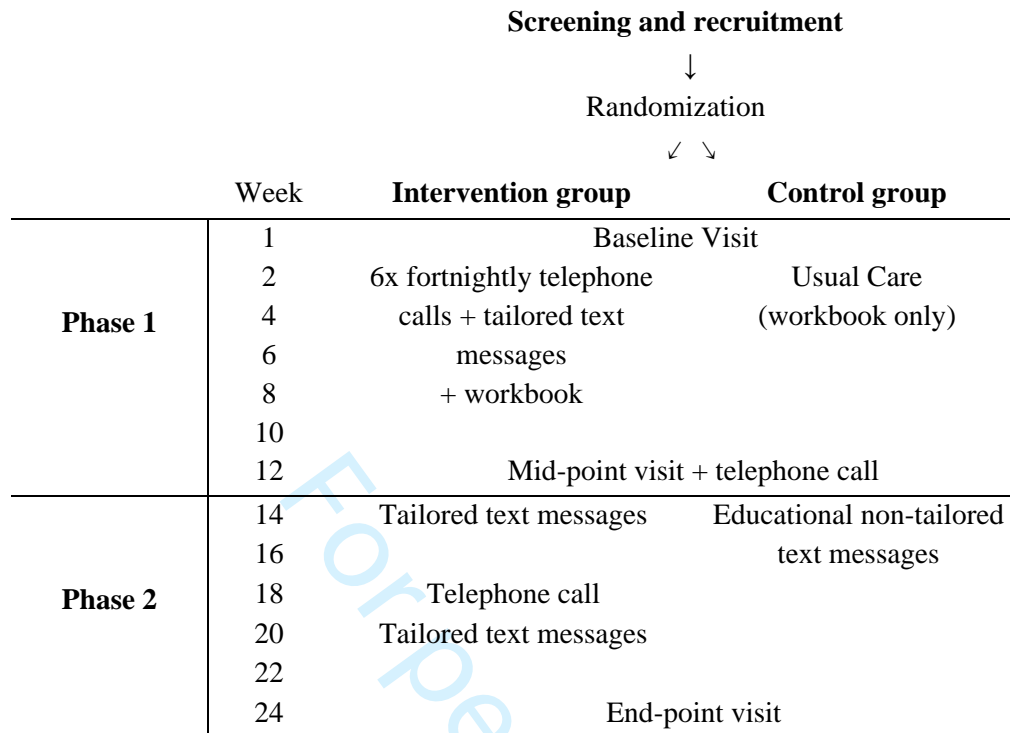

**Supplementary Figure 1.** Summary of ENTICE-CKD program delivery.

**References for supplementary material**

1. Pollock C, Voss D, Hodson E, Crompton C, Caring for Australasians with Renal Impairment. The CARI guidelines. Nutrition and growth in kidney disease. *Nephrology*. 2005;10 Suppl 5(2005 Dec):S177.
2. NHMRC. Australian Dietary Guidelines. In. Canberra: National Health and Medical Research Council, Department of Health and Ageing; 2013.

For peer review only

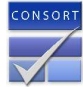

## CONSORT 2010 checklist of information to include when reporting a randomised trial\*

| Section/Topic                    | Item No | Checklist item                                                                                                                                                                              | Reported on page No     |
|----------------------------------|---------|---------------------------------------------------------------------------------------------------------------------------------------------------------------------------------------------|-------------------------|
| <b>Title and abstract</b>        |         |                                                                                                                                                                                             |                         |
|                                  | 1a      | Identification as a randomised trial in the title                                                                                                                                           | NA; abstract and method |
|                                  | 1b      | Structured summary of trial design, methods, results, and conclusions (for specific guidance see CONSORT for abstracts)                                                                     | 4-5                     |
| <b>Introduction</b>              |         |                                                                                                                                                                                             |                         |
| Background and objectives        | 2a      | Scientific background and explanation of rationale                                                                                                                                          | 6-7                     |
|                                  | 2b      | Specific objectives or hypotheses                                                                                                                                                           | 7                       |
| <b>Methods</b>                   |         |                                                                                                                                                                                             |                         |
| Trial design                     | 3a      | Description of trial design (such as parallel, factorial) including allocation ratio                                                                                                        | 7-8                     |
|                                  | 3b      | Important changes to methods after trial commencement (such as eligibility criteria), with reasons                                                                                          | NA                      |
| Participants                     | 4a      | Eligibility criteria for participants                                                                                                                                                       | 8                       |
|                                  | 4b      | Settings and locations where the data were collected                                                                                                                                        | 11                      |
| Interventions                    | 5       | The interventions for each group with sufficient details to allow replication, including how and when they were actually administered                                                       | 8-11                    |
| Outcomes                         | 6a      | Completely defined pre-specified primary and secondary outcome measures, including how and when they were assessed                                                                          | 11-13                   |
|                                  | 6b      | Any changes to trial outcomes after the trial commenced, with reasons                                                                                                                       | NA                      |
| Sample size                      | 7a      | How sample size was determined                                                                                                                                                              | 11                      |
|                                  | 7b      | When applicable, explanation of any interim analyses and stopping guidelines                                                                                                                | NA                      |
| <b>Randomisation:</b>            |         |                                                                                                                                                                                             |                         |
| Sequence generation              | 8a      | Method used to generate the random allocation sequence                                                                                                                                      | 8                       |
|                                  | 8b      | Type of randomisation; details of any restriction (such as blocking and block size)                                                                                                         | 8                       |
| Allocation concealment mechanism | 9       | Mechanism used to implement the random allocation sequence (such as sequentially numbered containers), describing any steps taken to conceal the sequence until interventions were assigned | 8                       |
| Implementation                   | 10      | Who generated the random allocation sequence, who enrolled participants, and who assigned participants to interventions                                                                     | 8                       |

|    |                                                      |     |                                                                                                                                                   |                    |
|----|------------------------------------------------------|-----|---------------------------------------------------------------------------------------------------------------------------------------------------|--------------------|
| 1  |                                                      |     |                                                                                                                                                   |                    |
| 2  | Blinding                                             | 11a | If done, who was blinded after assignment to interventions (for example, participants, care providers, those assessing outcomes) and how          | 8-12               |
| 3  |                                                      |     |                                                                                                                                                   |                    |
| 4  |                                                      | 11b | If relevant, description of the similarity of interventions                                                                                       | 8-11               |
| 5  | Statistical methods                                  | 12a | Statistical methods used to compare groups for primary and secondary outcomes                                                                     | 13-14              |
| 6  |                                                      | 12b | Methods for additional analyses, such as subgroup analyses and adjusted analyses                                                                  | NA                 |
| 7  |                                                      |     |                                                                                                                                                   |                    |
| 8  | <b>Results</b>                                       |     |                                                                                                                                                   |                    |
| 9  |                                                      |     |                                                                                                                                                   |                    |
| 10 | Participant flow (a diagram is strongly recommended) | 13a | For each group, the numbers of participants who were randomly assigned, received intended treatment, and were analysed for the primary outcome    | Figure 1           |
| 11 |                                                      | 13b | For each group, losses and exclusions after randomisation, together with reasons                                                                  | 15-16              |
| 12 | Recruitment                                          | 14a | Dates defining the periods of recruitment and follow-up                                                                                           | 8                  |
| 13 |                                                      | 14b | Why the trial ended or was stopped                                                                                                                | NA                 |
| 14 | Baseline data                                        | 15  | A table showing baseline demographic and clinical characteristics for each group                                                                  | Table 1            |
| 15 | Numbers analysed                                     | 16  | For each group, number of participants (denominator) included in each analysis and whether the analysis was by original assigned groups           | Results and tables |
| 16 |                                                      |     |                                                                                                                                                   |                    |
| 17 | Outcomes and estimation                              | 17a | For each primary and secondary outcome, results for each group, and the estimated effect size and its precision (such as 95% confidence interval) | NA                 |
| 18 |                                                      | 17b | For binary outcomes, presentation of both absolute and relative effect sizes is recommended                                                       | NA                 |
| 19 | Ancillary analyses                                   | 18  | Results of any other analyses performed, including subgroup analyses and adjusted analyses, distinguishing pre-specified from exploratory         | NA                 |
| 20 |                                                      |     |                                                                                                                                                   |                    |
| 21 | Harms                                                | 19  | All important harms or unintended effects in each group (for specific guidance see CONSORT for harms)                                             | NA                 |
| 22 |                                                      |     |                                                                                                                                                   |                    |
| 23 | <b>Discussion</b>                                    |     |                                                                                                                                                   |                    |
| 24 | Limitations                                          | 20  | Trial limitations, addressing sources of potential bias, imprecision, and, if relevant, multiplicity of analyses                                  | 21-22              |
| 25 | Generalisability                                     | 21  | Generalisability (external validity, applicability) of the trial findings                                                                         | 21-22              |
| 26 | Interpretation                                       | 22  | Interpretation consistent with results, balancing benefits and harms, and considering other relevant evidence                                     | 19-22              |
| 27 |                                                      |     |                                                                                                                                                   |                    |
| 28 | <b>Other information</b>                             |     |                                                                                                                                                   |                    |
| 29 | Registration                                         | 23  | Registration number and name of trial registry                                                                                                    | 5 & 7              |
| 30 | Protocol                                             | 24  | Where the full trial protocol can be accessed, if available                                                                                       | 5 & 7              |
| 31 | Funding                                              | 25  | Sources of funding and other support (such as supply of drugs), role of funders                                                                   | Title page         |
| 32 |                                                      |     |                                                                                                                                                   |                    |

37

38 \*We strongly recommend reading this statement in conjunction with the CONSORT 2010 Explanation and Elaboration for important clarifications on all the items. If relevant, we also

39 recommend reading CONSORT extensions for cluster randomised trials, non-inferiority and equivalence trials, non-pharmacological treatments, herbal interventions, and pragmatic trials.

40 Additional extensions are forthcoming: for those and for up to date references relevant to this checklist, see [www.consort-statement.org](http://www.consort-statement.org).

41

# BMJ Open

## Feasibility and Acceptability of a Telehealth Coaching to Promote Healthy Eating in Chronic Kidney Disease: A Mixed Methods Process Evaluation

|                                 |                                                                                                                                                                                                                                                                                                                                                                                                                                                                                                                                                                                                                                                                                                                                                                                                                                                                                                                                                                                                                                   |
|---------------------------------|-----------------------------------------------------------------------------------------------------------------------------------------------------------------------------------------------------------------------------------------------------------------------------------------------------------------------------------------------------------------------------------------------------------------------------------------------------------------------------------------------------------------------------------------------------------------------------------------------------------------------------------------------------------------------------------------------------------------------------------------------------------------------------------------------------------------------------------------------------------------------------------------------------------------------------------------------------------------------------------------------------------------------------------|
| Journal:                        | <i>BMJ Open</i>                                                                                                                                                                                                                                                                                                                                                                                                                                                                                                                                                                                                                                                                                                                                                                                                                                                                                                                                                                                                                   |
| Manuscript ID                   | bmjopen-2018-024551.R1                                                                                                                                                                                                                                                                                                                                                                                                                                                                                                                                                                                                                                                                                                                                                                                                                                                                                                                                                                                                            |
| Article Type:                   | Research                                                                                                                                                                                                                                                                                                                                                                                                                                                                                                                                                                                                                                                                                                                                                                                                                                                                                                                                                                                                                          |
| Date Submitted by the Author:   | 05-Nov-2018                                                                                                                                                                                                                                                                                                                                                                                                                                                                                                                                                                                                                                                                                                                                                                                                                                                                                                                                                                                                                       |
| Complete List of Authors:       | Kelly, Jaimon; Bond University, Faculty of Health Science and Medicine<br>Warner, Molly; Bond University, Faculty of Health Science and Medicine<br>Conley, Marguerite; Princess Alexandra Hospital, Department of Nutrition and Dietetics<br>Reidlinger, Dianne; Bond University, Faculty of Health Sciences and Medicine<br>Hoffman, Tammy; Bond University, Faculty of Health Science and Medicine<br>Craig, Jonathan; Flinders University, College of Medicine and Public Health; The University of Sydney, Sydney School of Public Health<br>Tong, Allison; The University of Sydney, Sydney School of Public Health<br>Reeves, Marina; University of Queensland,<br>Johnson, David; University of Queensland, Centre for Kidney Disease Research; Princess Alexandra Hospital, Department of Nephrology<br>Palmer, Suetonia; University of Otago, Department of Medicine<br>Campbell, Katrina; Bond University, Faculty of Health Sciences and Medicine; Princess Alexandra Hospital, Department of Nutrition and Dietetics |
| <b>Primary Subject Heading</b>: | Nutrition and metabolism                                                                                                                                                                                                                                                                                                                                                                                                                                                                                                                                                                                                                                                                                                                                                                                                                                                                                                                                                                                                          |
| Secondary Subject Heading:      | Renal medicine, Health services research                                                                                                                                                                                                                                                                                                                                                                                                                                                                                                                                                                                                                                                                                                                                                                                                                                                                                                                                                                                          |
| Keywords:                       | Diet, Telehealth, chronic kidney disease, process evaluation                                                                                                                                                                                                                                                                                                                                                                                                                                                                                                                                                                                                                                                                                                                                                                                                                                                                                                                                                                      |
|                                 |                                                                                                                                                                                                                                                                                                                                                                                                                                                                                                                                                                                                                                                                                                                                                                                                                                                                                                                                                                                                                                   |

SCHOLARONE™  
Manuscripts



1  
2 **Feasibility and Acceptability of a Telehealth Coaching to Promote Healthy Eating in Chronic**  
3  
4 **Kidney Disease: A Mixed Methods Process Evaluation**  
5  
6  
7

8  
9 **Author contact information**

10  
11 Jaimon T Kelly

12  
13 MNutrDiet<sup>1</sup>, PhD, [jkelly@bond.edu.au](mailto:jkelly@bond.edu.au)  
14

15  
16 Molly M Warner

17  
18 MNutrDietPrac<sup>1</sup>, [mwarner@bond.edu.au](mailto:mwarner@bond.edu.au)  
19

20  
21 Marguerite Conley

22  
23 MNutr&Diet<sup>2</sup>, [marguerite.conley@health.qld.gov.au](mailto:marguerite.conley@health.qld.gov.au)  
24

25  
26 Dianne P Reidlinger

27  
28 Assistant Professor<sup>1</sup>, PhD, [dreidlin@bond.edu.au](mailto:dreidlin@bond.edu.au)  
29

30  
31 Tammy Hoffmann

32  
33 Professor<sup>3</sup>, PhD, [thoffman@bond.edu.au](mailto:thoffman@bond.edu.au)  
34

35  
36 Jonathan Craig

37  
38 Professor<sup>4,5</sup>, PhD, [jonathan.craig@flinders.edu.au](mailto:jonathan.craig@flinders.edu.au)  
39

40  
41 Allison Tong

42  
43 Associate Professor<sup>5,6</sup>, PhD, [allison.tong@sydney.edu.au](mailto:allison.tong@sydney.edu.au)  
44

45  
46 Marina Reeves

47  
48 Associate Professor<sup>7</sup>, PhD, [m.reeves@sph.uq.edu.au](mailto:m.reeves@sph.uq.edu.au)  
49

50  
51 David W Johnson

52  
53 Professor<sup>8,9,10</sup>, PhD, [david.johnson2@health.qld.gov.au](mailto:david.johnson2@health.qld.gov.au)  
54

55  
56 Suetonia Palmer

57  
58 Associate Professor<sup>11</sup>, PhD, [suetonia.palmer@otago.ac.nz](mailto:suetonia.palmer@otago.ac.nz)  
59

60  
61 Katrina L Campbell

Associate Professor<sup>1,2</sup>, PhD, [kcampbel@bond.edu.au](mailto:kcampbel@bond.edu.au)

## Affiliations

1. Faculty of Health Science and Medicine, Bond University, Robina, Queensland, Australia
2. Department of Nutrition and Dietetics, Princess Alexandra Hospital, Queensland, Australia
3. Centre for Research in Evidence Based Practice, Faculty of Health Sciences and Medicine, Bond University, Gold Coast, Australia
4. College of Medicine and Public Health, Flinders University
5. Sydney School of Public Health, The University of Sydney
6. Centre for Kidney Research, The Children's Hospital at Westmead
7. Cancer Prevention Research Centre, School of Public Health, The University of Queensland, Herston, Queensland, Australia
8. Department of Nephrology, Princess Alexandra Hospital, Brisbane, Australia
9. Centre for Kidney Disease Research, University of Queensland, Brisbane, Australia
10. Translational Research Institute, Brisbane, Australia
11. Department of Medicine, University of Otago Christchurch, Christchurch, New Zealand.

## Funding

This study was supported by a research support grant awarded by Kidney Health Australia via Australasian Kidney Trial Network (AKTN), and a Vice-Chancellors Research Award through Bond University.

## Conflict of interest

The authors declare that they have no conflicts of interest.

## Author contributions

JK wrote the first draft of the manuscript and takes responsibility for the integrity of the data. JK, KC, DJ, MR and SP assisted in the conceptualization of the trial design. MW & DR were responsible

1  
2 for the qualitative data collection and analysis, assisted in the conceptualization of the qualitative  
3  
4 research methods. MW wrote the qualitative results section of the manuscript. JK & MC designed  
5  
6 the intervention materials and were responsible for the management of the trial at their respective  
7  
8 sites. TH, JC and AT provided methodological expertise and revised drafts of the manuscript. All  
9  
10 authors contributed to revisions of the manuscript and approved the final version for submission.  
11  
12  
13 Jaimon Kelly is the guarantor and affirms that the manuscript is an honest, accurate, and transparent  
14  
15 account of the study being reported.  
16  
17

18  
19 **Data sharing:**

20  
21 No additional data available.  
22  
23

24  
25  
26 **Keywords** Diet; telehealth; chronic kidney disease; process evaluation.  
27

28 **Abstract word count:** 290  
29

30 **Text word count:** 5,361  
31  
32

33  
34 **Corresponding author**

35  
36  
37 **Jaimon T. Kelly**  
38

39  
40 Faculty of Health Science and Medicine, Bond University  
41

42  
43 14 University Drive, Robina, Queensland, 4226, Australia  
44

45  
46 E-mail: [jkelly@bond.edu.au](mailto:jkelly@bond.edu.au)  
47  
48  
49  
50  
51  
52  
53  
54  
55  
56  
57  
58  
59  
60

## ABSTRACT

**Objective:** To evaluate the feasibility and acceptability of a personalized telehealth intervention to support dietary self-management in adults with stage 3-4 CKD.

**Design:** Mixed-methods process evaluation embedded in a randomized controlled trial.

**Participants:** People with stage 3-4 CKD (eGFR 15-60mL/min/1.73m<sup>2</sup>).

**Setting:** Participants were recruited from three hospitals in Australia and completed the intervention in ambulatory community settings.

**Intervention:** The intervention group received one telephone call per fortnight and 2-8 tailored text messages for three months, and then 4-12 tailored text messages for three months without telephone calls. The control group received usual care for three months then non-tailored education-only text messages for three months.

**Main outcome measures:** Feasibility (recruitment, non-participation and retention rates, intervention fidelity, and participant adherence) and acceptability (questionnaire and semi-structured interviews).

**Statistical analyses performed:** Descriptive statistics and qualitative content analysis.

**Results:** Overall, 80/230 (35%) eligible patients who were approached consented to participate (mean±SD age 61.5±12.6 years). Retention was 93% and 98% in the intervention and control groups, respectively, and 96% of all planned intervention calls were completed. All participants in the intervention arm identified the tailored text messages as useful in supporting dietary self-management. In the control group, 27 (69%) reported the non-tailored text messages were useful in supporting change. Intervention group participants reported that the telehealth program delivery methods were practical and able to be integrated into their lifestyle. Participants viewed the intervention as an acceptable, personalized alternative to face-face clinic consultations, and were satisfied with the frequency of contact.

**Conclusions:** This telehealth-delivered dietary coaching program is an acceptable intervention which appears feasible for supporting dietary self-management in stage 3-4 CKD. A larger-scale

1  
2 randomized controlled trial is needed to evaluate the efficacy of the coaching program on clinical and  
3  
4 patient-reported outcomes.  
5

6 ***Trial registration:*** Prospectively registered (ACTRN12616001212448)  
7  
8  
9

## 10 **Article Summary**

- 13 • This study utilized a pragmatic design which enhanced its feasibility.
- 14 • Mixed methods captured both quantitative and qualitative data to determine multiple aspects  
15 of feasibility and acceptability.
- 16 • Interview data to determine the intervention's acceptability were not captured in control  
17  
18  
19  
20  
21  
22  
23  
24  
25  
26  
27  
28  
29  
30  
31  
32  
33  
34  
35  
36  
37  
38  
39  
40  
41  
42  
43  
44  
45  
46  
47  
48  
49  
50  
51  
52  
53  
54  
55  
56  
57  
58  
59  
60

## INTRODUCTION

Chronic kidney disease (CKD) is a progressive condition affecting over 10% of the population worldwide.<sup>1</sup> The management of CKD is burdensome for patients, families and the healthcare system.

With the incidence of end stage kidney disease (ESKD) growing, there is a pressing need for preventative action.<sup>2</sup> This includes the provision of pragmatic, person-centred interventions to support dietary behaviour change.

Diet is a modifiable risk factor for the progression of CKD to end-stage kidney disease (ESKD).<sup>3 4</sup> Typical dietary advice given to people with CKD includes restricting individual nutrients, such as sodium, protein, potassium and phosphate. However, there is little evidence regarding the adherence to, and efficacy of, nutrient-specific dietary advice in CKD populations.<sup>5</sup> Recent evidence suggests that following a healthy dietary pattern, as a whole food-based dietary pattern is associated with a reduced risk of death in people with CKD.<sup>6</sup> A focus on foods rather than single nutrients may also facilitate increased adherence to dietary change in people with CKD<sup>6 7</sup> which is otherwise challenging due to dietary complexity and competing demands of other medical and lifestyle self-management.<sup>8</sup> Overcoming these challenges to implementing sustained dietary change is necessary to test whether improving diet quality alters patient-centred outcomes.

Providing regular and individualized dietary support required for those with CKD comes with geographical, time and financial barriers.<sup>9</sup> Furthermore, addressing diet quality requires more frequent and repetitive support that most health services are unable to provide. To determine whether increasing diet quality (through dietary pattern) may attenuate the progression of CKD and elevated cardiovascular risk on a sufficient scale for a randomized controlled trial (RCT), alternative modalities that are effective in supporting dietary management are needed. Telehealth modalities, particularly telephone-based and text message coaching, present an opportunity to overcome barriers and challenges that people with CKD encounter in accessing health care services.<sup>8 10</sup> Telehealth

1  
2 interventions may facilitate an increased frequency and quality of contact between the patient and  
3  
4 healthcare professional,<sup>11 12</sup> which may improve acceptability, uptake and adherence to  
5  
6 interventions<sup>13</sup> and better align with a patient-centred model of care and reflect the needs of people  
7  
8 with CKD.<sup>10</sup> While clinical trials of telehealth-delivered dietary interventions conducted specifically  
9  
10 in CKD are lacking, trials conducted in the broader chronic disease population have shown telehealth-  
11  
12 delivered dietary interventions are effective at supporting behaviour change to reduce chronic disease  
13  
14 risk, including improving diet quality, fruit and vegetable consumption and reducing dietary sodium  
15  
16 intake, compared to face-to-face modalities.<sup>11</sup> This may be due to the flexibility that both telephone  
17  
18 and text messaging interventions provide in time and location, and the opportunity to offer more  
19  
20 intensive dietary coaching that may not be feasible with traditional care models.<sup>14-16</sup> Text messaging  
21  
22 has been utilized to ‘extend contact’ after an intervention and has been shown to maintain clinical  
23  
24 outcomes and minimize intervention decay.<sup>17 18</sup> A systematic review of text message health  
25  
26 interventions highlighted the need for better evidence on the relative effectiveness of text-based  
27  
28 interventions including the level of tailoring of text message delivery (incorporating frequency and  
29  
30 timing), level of interaction (i.e. response and feedback) and impact of additional interventions (such  
31  
32 as a combination with telephone, face-to-face, video or internet).<sup>19</sup>

33  
34  
35  
36  
37  
38  
39  
40 While dietary patterns aligned with a higher diet quality are associated with lower mortality in CKD,<sup>6</sup>  
41  
42 the level of tailoring and individualised coaching required to achieve and support dietary self-  
43  
44 management is unknown. Non-CKD trials have demonstrated effectiveness for minimally tailored  
45  
46 text messages,<sup>20</sup> information-only text messages and tailored interactive text messages.<sup>21</sup> However,  
47  
48 no approach has been shown to be superior and no study has investigated such questions in the CKD  
49  
50 population. To determine the level of tailoring, and the delivery method that is most feasible and  
51  
52 acceptable for patients with CKD, this pilot study aimed to evaluate the feasibility and acceptability  
53  
54 of telehealth-delivered dietary coaching to support dietary self-management in stage 3-4 CKD.  
55  
56  
57  
58  
59

## 60 MATERIALS AND METHODS

1  
2 We used a mixed-methods design in this pilot study, whereby qualitative data on the patient  
3 experiences were embedded within quantitative data relating to participants recruited into the  
4 Evaluation of iNdividualized Telehealth Intensive Coaching to promote healthy Eating and lifestyle  
5 in Chronic Kidney Disease (ENTICE-CKD) program. All data were prospectively collected. This  
6 pilot randomized controlled trial was prospectively registered (ACTRN12616001212448) and  
7 reported based on the extension of the CONSORT statement for feasibility and pilot studies.<sup>22</sup> This  
8 trial was approved by the Metro South Health Service District Human Research Ethics Committee  
9 (EC00167) and Bond University Human Research Ethics Committee (EC00357).

## 21 **Design**

23  
24 This mixed-methods process evaluation was embedded in a randomized controlled trial, conducted  
25 from November 2016 to November 2017. The dietary intervention was designed using the social  
26 cognitive theory,<sup>23</sup> with a patient-centred focus on improving self-management to reduce dietary  
27 sodium intake (<2300mg/day) and increase dietary quality in accordance with the Australian Dietary  
28 Guidelines (see Supplementary Table 1 for intervention guidance).<sup>24</sup> The constructs of the social  
29 cognitive theory most utilised were outcome expectation (through education text messages and calls),  
30 self-regulation (through goal setting, self-monitoring, coaches' feedback during calls and text-  
31 message goal-check replies), and self-efficacy (through setting small, achievable goals, celebrating  
32 success, encouraging self-monitoring and prompting problem solving in calls and text messages).  
33 Interventions were adjunct to usual nephrology care from treating physician(s) and renal team  
34 members, including ad hoc referrals to allied health practitioners during the study.

## 51 **Participants**

52  
53  
54 Participants were recruited from three tertiary nephrology units in Queensland, Australia over a six  
55 month period. Inclusion criteria were: adults over 18 years of age; stage 3-4 CKD (eGFR 15-  
56 60mL/min/1.73m<sup>2</sup>); and access to a mobile device capable of receiving text messages and telephone  
57 calls. Exclusion criteria were: anticipated dialysis commencement or kidney transplant within the  
58  
59  
60



1 following 12 months; pregnancy; non-English speaking; cognitively impaired; or deemed unfit to  
2 participate by their treating nephrologist.  
3  
4

5  
6 Potential participants were screened for eligibility by a local site investigator or research nurse from  
7 daily outpatient appointment lists and relevant hospital databases. Following discussion with their  
8 treating nephrologist, people were approached and invited to participate. If people were unable to be  
9 contacted at their outpatient appointment, they were mailed a written invitation to participate with a  
10 phone number to contact if they were interested.  
11  
12

13 Eligible participants were randomized on a 1:1 ratio into one of two groups (stratified by recruiting  
14 site (site A, B, C) and presence of diabetes (Yes, No) in blocks of 8's). Randomization was completed  
15 by computer-generated random numbers carried out by an independent statistician not involved in  
16 the study.  
17  
18

### 19 **Study treatment**

20  
21 The ENTICE-CKD program was completed in two three-month phases in both the intervention and  
22 control group of the study as outlined in Supplementary Figure 1 and the details of the intervention  
23 according to the TIDieR items (1-10)<sup>25</sup> is described in Supplementary Table 2. Details about the  
24 intervention fidelity TIDieR items (11 and 12) is described and reported throughout this paper and is  
25 not summarised in Supplemental Table 2. Each participant was involved in the trial for six  
26 consecutive months. All participants were provided with an ENTICE-CKD workbook at the baseline  
27 visit. The 90-page workbook included information on setting *specific, measurable, achievable,*  
28 *realistic, and time-bound* (SMART) goals; eating well for kidneys (based on the Australian Dietary  
29 Guidelines [Supplementary Table 1]);<sup>24</sup> active living (based on the Australian Physical Activity  
30 Guidelines);<sup>26</sup> role of diet in kidney disease, strategies for planning, self-monitoring checklists, and a  
31 list of useful websites, apps, and recipes for further reference.  
32  
33  
34  
35  
36  
37  
38  
39  
40  
41  
42  
43  
44  
45  
46  
47  
48  
49  
50  
51  
52  
53  
54  
55  
56  
57

### 58 **Telehealth coaches**

1  
2 Each participant was assigned to one of two telehealth coaches at baseline. The participant had the  
3  
4 same coach for the duration of the program. Both telehealth coaches were registered dietitians  
5  
6 (Australian equivalent) with additional training in renal nutrition, behaviour change and motivational  
7  
8 interviewing; were external to the recruiting sites and had never met the participants; and were not  
9  
10 involved in any outcome data collection.  
11  
12

### 13 14 **Phase 1**

15  
16  
17 The participants in the intervention group received six fortnightly telephone calls in phase 1 which  
18  
19 were scheduled on weekdays at a time of the participants choosing (from 7am to 7pm). The first call  
20  
21 was scheduled for 45 minutes and five subsequent for approximately 30 minutes. Each call was based  
22  
23 on established protocols and call scripts. The telephone call content was guided by the workbook  
24  
25 topics, structured according to the 5A's framework (Assess, Advise, Agree, Assist, Arrange),<sup>27</sup> and  
26  
27 individually tailored to participants using relevant educational strategies, and in consideration of the  
28  
29 participant goals and co-morbidities. Where required, 24-hour dietary recalls were undertaken during  
30  
31 coaching calls to track adherence and progress with goals. Coaches used Microsoft Excel<sup>28</sup> to  
32  
33 document progress of each call and log information including goal setting, implementation intentions,  
34  
35 self-monitoring tools, call attempts and durations, and text message preferences.  
36  
37  
38  
39  
40  
41  
42

43 In addition, participants in the intervention group received two to eight text messages scheduled  
44  
45 between coaching calls with the actual number and time of day determined by each participant's  
46  
47 preference. Text categories included: educational; self-monitoring; and goal setting. The schedule of  
48  
49 text messages for the intervention and control group in phase 1 and 2 is detailed in Supplementary  
50  
51 Table 2. The text messages were sent using a web-based, semi-automated text message management  
52  
53 platform (Propelo, [www.propelo.com.au](http://www.propelo.com.au)), developed and administered by The University of  
54  
55 Queensland's School of Public Health.<sup>29</sup> The investigators, in consultation with local nephrologists,  
56  
57 dietitians and evidence-based practice guidelines, designed the library of text messages, which were  
58  
59  
60

1  
2 then reviewed for comprehension by a group of patients, nephrologists and members of the  
3  
4 investigator team. The text message library was imported into the software platform, which was  
5  
6 designed to tailor text messages based on: participant's name; individual goals; barriers to achieving  
7  
8 goals; and, participant-identified solutions to overcoming those barriers. These tailoring variables  
9  
10 were collected and modified as required by the coaches following the initial and subsequent coaching  
11  
12 calls.  
13  
14

15  
16  
17  
18 As shown in Supplementary Table 2, participants in the intervention group could receive one 'goal  
19  
20 check' per goal (total 2 goal checks) per fortnight in phase 1 and up to 2 goal checks per goal (total  
21  
22 2 to 4 goal checks) per fortnight in phase 2. These goal checks required the participant to respond to  
23  
24 the text with a "yes" or "no" which prompted the software to send a pre-determined response. An  
25  
26 incoming text reply outside protocol (i.e. not a "yes" or "no" response) was classified as an  
27  
28 'unrecognized response'. This triggered an email to the participant's coach and was only responded  
29  
30 to where participants expressed considerable risk to their health (e.g. symptoms needing medical  
31  
32 attention).  
33  
34  
35

36  
37  
38  
39 Participants in the control group received no coaching or text messages between the baseline visit  
40  
41 and three months (phase 1). The control group continued to receive standard care under their treating  
42  
43 nephrologist (typically 1 clinic visit every 3 months) and were encouraged to work through the  
44  
45 ENTICE-CKD workbook at their own pace.  
46  
47

## 48 49 **Phase 2**

50  
51  
52 At three months, participants in the intervention group completed a tailoring telephone call with their  
53  
54 coach to determine individual preferences for the timing and frequency of text messages for phase 2.  
55  
56 At 18 weeks (i.e. half way through phase 2), participants received a second tailoring call where they  
57  
58 could modify the timing and frequency of text messages and could update their goals. Intervention  
59  
60

1  
2 group participants chose text message frequencies (four to 12 text messages per fortnight) for the  
3  
4 same types of texts that they received in phase 1 (educational tips, self-monitoring, goal checks).  
5  
6 Participants in the control group received non-tailored education-only text messages (described in  
7  
8 Supplementary Table 2) at the commencement of phase 2 of the trial. This intervention was additional  
9  
10 to the usual care participants in the control group were receiving in phase 1.  
11  
12  
13

### 14 **Data collection**

15  
16  
17 Basic demographic data (including participant's age and gender) were recorded at baseline. Socio-  
18  
19 economic status was estimated from participants' postcodes, according to the Index of Relative Socio-  
20  
21 economic Advantage and Disadvantage (IRSAD).<sup>30</sup> Baseline health literacy was collected using the  
22  
23 single item Literacy Screener which classifies health literacy as good or limited based on the single  
24  
25 question, "How often do you need to have someone help you when you read instructions, pamphlets,  
26  
27 or other written material from your doctor or pharmacy?".<sup>31</sup>  
28  
29  
30  
31

### 32 **Reach and retention**

33  
34  
35 The sample size was determined for the purpose of informing a future study. Therefore, a target of  
36  
37 30-40 participants per arm was set to allow for meaningful and reliable data, which could be used to  
38  
39 power future trials.<sup>32</sup> Recruitment and non-participation rates were captured across the three  
40  
41 recruitment sites, with a goal to achieve the target sample size of 80 participants in the six month  
42  
43 recruitment time frame. Retention rate was measured at three and six months in both study groups,  
44  
45 with successful retention defined 80% at the six-month study end.  
46  
47  
48  
49

### 50 **Intervention delivery**

51  
52  
53 Individual cases were discussed fortnightly between the coaches and the lead investigator to support  
54  
55 consistent intervention delivery. All coaching calls were audio recorded, from which 10% were  
56  
57 assessed for consistency by peer-review by an individual external to the project. Consistency  
58  
59 considered the pre-defined call scripts and potential deviation from the call scripts with reasons for  
60

1 why this occurred. The following fidelity data were also collected and stored in a Microsoft Excel<sup>28</sup>  
2 database throughout the trial: number, duration and content of coaching telephone calls; number and  
3  
4 database throughout the trial: number, duration and content of coaching telephone calls; number and  
5  
6 type of text messages delivered; number and type of text message responses; and time spent by  
7  
8 coaches for each interaction.  
9

### 10 11 12 ***Intervention adherence*** 13

14  
15 Adherence was defined as successfully completing five of the six telephone calls for the intervention  
16  
17 group. Data were also collected on individual participant adherence to the dietary intervention,  
18  
19 collected by coaches in each telephone call using a call log template in Microsoft Excel.<sup>28</sup> In the call  
20  
21 logs, coaches described evidence of the participant's overall progress, evidence of self-monitoring,  
22  
23 goals set and implementation intentions (behaviours implemented to achieve goals) during each call,  
24  
25 which was quantified in counts to capture participant adherence.  
26  
27  
28

### 29 30 ***Acceptability*** 31

32  
33 A utility and acceptability survey of the text message component of the ENTICE-CKD trial was  
34  
35 collected from all participants at the six-month end of study visit (Supplementary Table 3). The  
36  
37 survey included 13 items, developed specifically for the study, with five items asking participants to  
38  
39 rate on a 5-point Likert scale from 1 'strongly disagree' to 5 'strongly agree', four items asking  
40  
41 participants yes/no questions, and four multiple choice questions, based on previous methodology in  
42  
43 cardiac patients.<sup>20</sup> In addition to this, during the sixth telephone call (three-month study mid-point;  
44  
45 for intervention participants only), coaches obtained verbal consent of participants to be approached  
46  
47 to complete an interview relating to their experiences of the intervention.  
48  
49  
50

51  
52  
53  
54 Semi-structured interviews were conducted in-person and by telephone. Participants were recruited  
55  
56 based on consecutive sampling of completing participants until data saturation was achieved. The  
57  
58 interviews were conducted by investigator (MW), who had not previously met the participants and  
59  
60 was not involved in the planning of the intervention. The interview guide included questions on:

1  
2 barriers and facilitators of program adherence; telehealth delivery methods and frequency of contact;  
3  
4 usability of the program; goal setting, self-monitoring, behaviour change; and experiences  
5  
6 (Supplementary Table 4). Modification of the interview guide occurred after each interview to  
7  
8 broaden scope of the data collected. Interviews were audio-recorded and transcribed verbatim.  
9

### 10 **Patient involvement**

11  
12 The study was designed in collaboration with similar participants as those recruited for this study.  
13  
14 This patient engagement was conducted as a qualitative study, reported elsewhere by the  
15  
16 investigators<sup>10</sup> and details the patient reported burden associated with following dietary  
17  
18 recommendations that were considered while developing this trial. All intervention materials,  
19  
20 including the workbook and text messages, were reviewed by people with CKD with feedback forms  
21  
22 which were used to revise all the material before production. No patients were involved in the  
23  
24 recruitment or data collection of this process evaluation study. A summary of the main results will be  
25  
26 mailed out to participants. The burden of the trial has been evaluated in semi-structured interviews  
27  
28 (Warner et al, patients' experiences and perspectives of the acceptability of telehealth coaching to  
29  
30 improve diet quality in chronic kidney disease: a qualitative interview study).  
31  
32  
33  
34  
35

### 36 **Data analysis**

37  
38 Quantitative data were analysed using simple descriptive statistics (counts and percentages). To  
39  
40 determine the difference in the utility and acceptability between the two study groups, a standard Chi  
41  
42 square test was used with a significance level determined as  $p < 0.05$ . Statistics were conducted in  
43  
44 SPSS Statistics for Windows (version 22.0. Chicago: SPSS Inc.) and Microsoft Excel.<sup>28</sup>  
45  
46  
47

48  
49 Inductive content analysis<sup>33</sup> of the semi-structured interview transcripts regarding acceptability of the  
50  
51 intervention was conducted researcher (MW) who was not involved in quantitative data planning,  
52  
53 collection and analysis. After familiarization with the data, an open coding approach was adopted to  
54  
55 identify, develop and finalize categories and subcategories within the data. A dietitian and qualitative  
56  
57 researcher (DR) familiar with the data then finalized and confirmed emerging categories that were  
58  
59  
60

1 relevant to the process evaluation. Verbatim quotes were collected and used to represent attributes  
2  
3 demonstrated for both the feasibility and acceptability of the ENTICE-CKD program. Microsoft  
4  
5 Word<sup>34</sup> was used to facilitate data management (tables) and basic content analysis (comments relating  
6  
7 to attributes demonstrating feasibility and acceptability) of data.  
8  
9  
10  
11  
12  
13  
14  
15  
16  
17  
18  
19  
20  
21  
22  
23  
24  
25  
26  
27  
28  
29  
30  
31  
32  
33  
34  
35  
36  
37  
38  
39  
40  
41  
42  
43  
44  
45  
46  
47  
48  
49  
50  
51  
52  
53  
54  
55  
56  
57  
58  
59  
60

For peer review only

## RESULTS

### Characteristics of participants

The baseline characteristics of the participants are reported in Table 1. Of the 80 participants who completed their baseline visit, 64% were men and had a mean age of 62 years. The stage of CKD varied within the sample, with 31% stage 3a (eGFR 45-59ml/min/1.73m<sup>2</sup>), 44% stage 3b (eGFR 30-44ml/min/1.73m<sup>2</sup>) and 25% stage 4 (eGFR 15-29ml/min/1.73m<sup>2</sup>). The most common comorbidities were hypertension (81%) and diabetes (39%) (Table 1). Baseline health literacy was good in over 90% of all participants. Baseline characteristics were well balanced across the two groups, suggesting randomisation was effective.

### Reach and retention

Participants were recruited between November 2016 and May 2017, from Gold Coast (43%), Sunshine Coast (31%) and Brisbane (26%) hospitals. The flow of participants through the ENTICE-CKD study is shown in Figure 1. A total of 230 potentially eligible individuals were approached and invited to participate, of whom 80 participants (35%) were recruited to the ENTICE-CKD trial. Of the 146 individuals who declined to participate, “not interested” was the most commonly stated reasons for non-participation (36%) followed by perceived excessive time commitment (16%), having other medical conditions which are taking priority (13%), travel burden to make study visits (11%), and already feeling healthy (10%). Other reasons for non-participation included already seeing a dietitian (6%), believed the intervention did not fit their current lifestyle (6%) or preferred not to use technology (1%). A further two individuals (1%) consented to the study but did not attend a baseline visit and were therefore not randomized to a treatment group.

Seventy-six (95%) of all randomly allocated participants completed the six-month telehealth program. A total of four (5%) participants withdrew from the study. All the withdrawals occurred in the first three months of the program. Three of the four participants who withdrew were from the



1  
2 intervention group (two were unable to be contacted and therefore did not commence the program,  
3  
4 and one participant was unable to continue due to a family illness). The sole participant who withdrew  
5  
6 from the control group did not report a reason for doing so. There were no appreciable differences in  
7  
8 the demographics of those participants who dropped out compared to those remaining in the trial.  
9

## 10 11 12 **Intervention delivery**

13  
14  
15 Table 2 shows the adherence to the planned delivery of the telephone and text message components  
16  
17 of the ENTICE-CKD intervention. The delivery of the scheduled telephone calls was conducted  
18  
19 according to protocol with 90% of planned calls being completed as scheduled. The mean duration  
20  
21 of the first intervention call was 45.5±10 minutes (range 28 to 75 minutes). The mean length of the  
22  
23 subsequent five calls was 24±10 minutes (range 2 to 62 minutes).  
24  
25

26  
27  
28  
29 A total of 4,985 intervention text messages were sent to ENTICE participants. The median number  
30  
31 of text messages sent to participants was within protocol for both groups, with intervention  
32  
33 participants receiving a median of four text messages per fortnight in phase 1 and seven per fortnight  
34  
35 in phase 2. Control participants received a median of six non-tailored education-only text messages  
36  
37 per fortnight in phase 2 (Table 2). The total number of incoming text messages (replies from  
38  
39 participants) was 1,100 (Table 2), 36% (n=400) triggered the appropriate goal-check reply, 3% (n=31)  
40  
41 required the dietitian coach to send a tailored text message to address the concern raised by the sender  
42  
43 and 61% (n=669) required no reply.  
44  
45  
46  
47

## 48 49 **Intervention adherence**

50  
51  
52 A total of 38 participants (95%) completed at least five calls, and 36 (90%) completed all six calls.  
53  
54 Two participants (5%) never received a telephone call. Goal setting was completed by all participants  
55  
56 in the first call as planned, with 95% of the participants setting two or more goals. The coaches' call  
57  
58 logs showed that, throughout the program, participants continued setting new goals with 10 (26%)  
59  
60 updating at least one goal in call two and 22 (61%) updating at least one goal throughout the

1 remaining four calls (Table 3). A total of 29 (76%) participants showed evidence of self-monitoring  
2 by the second call, which was sustained throughout phase 1 of the intervention. Evidence of  
3  
4 implementation intentions indicated that the majority of participants (82%) needed at least two calls  
5  
6 to begin putting planned dietary intentions in place. This number continued to rise over the next four  
7  
8 calls to 97% by the end of phase 1 of the intervention.  
9  
10  
11  
12

## 13 **Acceptability**

### 14 *Utility and acceptability*

15  
16  
17  
18  
19  
20  
21 There were several differences in ratings for utility and acceptability between the intervention  
22 (tailored-text) group compared to the non-tailored education-only text message (control) group (Table  
23 4). Participants agreed (responses for 'agree' and 'strongly agree') that the text message component:  
24 supported their dietary self-management (intervention 100%; 69% control,  $p=0.003$ ); provided  
25 motivation to change their diet (intervention 75%, control 50%;  $p=0.03$ ); and led them to a healthier  
26 diet (intervention 81%, control 61%,  $p=0.06$ ). There were no other differences observed in the utility  
27 of the text messages between the groups. The majority of text messages were saved and not deleted  
28 (77% overall), and 62% were shared with family, friends or health care providers across the two study  
29 groups. Acceptability of the text messages was assessed as high with 78% of all intervention and  
30 control participants reporting that the characteristics of the text messages (language, frequency,  
31 program length, time of delivery) were satisfactory.  
32  
33  
34  
35  
36  
37  
38  
39  
40  
41  
42  
43  
44  
45  
46

### 47 *Attributes of feasibility and acceptability*

48  
49  
50 Twenty one intervention participants were interviewed upon completion of phase 1, either by  
51 telephone (n=20) or face-to-face (n=1). Interviews ranged from 20 to 96 minutes (mean 49 min).  
52  
53 Overall, participants had positive experiences with the ENTICE-CKD trial. Attributes of the  
54 discussions are described in nine categories within components of acceptability and feasibility (Table  
55 5). The acceptability categories discussed by participants were: acceptable alternative to clinic,  
56  
57  
58  
59  
60

1  
2 preference for voice communication, regular contact via text message, and personalized messages  
3  
4 valued. The categories described under feasibility were: program integrated into lifestyle, diverse  
5  
6 delivery modes, social accountability, responding to dietary advice, and infeasible elements beyond  
7  
8 intervention. Participants emphasized the importance of social accountability; all participants  
9  
10 expressed benefit from the relationship built with their coach. Participants identified benefits from  
11  
12 telehealth delivery of the intervention, with the majority expressing preference for telehealth over  
13  
14 face-to-face interventions. They appreciated the personable, bidirectional conversation of the  
15  
16 telephone calls. The degree of usefulness of text messages was rated with some variability, although  
17  
18 no participants described the content or delivery of text messages negatively in the semi-structured  
19  
20 interviews. The only areas of variability were noted in the small number of participants who were not  
21  
22 familiar with using text messaging in their everyday life. Messages that were perceived to be  
23  
24 personalized were preferred for both calls and text messages. Participants felt that receiving  
25  
26 information via more than one delivery mode was helpful for making diet changes. Some participants  
27  
28 discussed challenges which were not addressed by the ENTICE-CKD intervention, such as  
29  
30 participants not being easily able to implement routine dietary behaviours whilst travelling, or those  
31  
32 lacking social support outside of the program.  
33  
34  
35  
36  
37  
38  
39  
40  
41  
42  
43  
44  
45  
46  
47  
48  
49  
50  
51  
52  
53  
54  
55  
56  
57  
58  
59  
60

## DISCUSSION

This mixed methods process evaluation study within a randomized controlled trial evaluated the feasibility and acceptability of the ENTICE-CKD telehealth coaching program to promote healthy eating among people with moderate CKD. The ENTICE-CKD program was a feasible intervention that was delivered according to protocol and enabled participant adherence. The tailored telephone calls and text messages were acceptable to intervention participants in this pilot. In contrast, the acceptability varied for those in the non-tailored education-only text message (control) group. The ENTICE-CKD program made participants feel supported and motivated for dietary self-management. However, this was more strongly indicated by participants who received the tailored intervention program, as opposed to the control group who received non-tailored education-only text messages. These results suggest that a tailored approach to text messaging may be important to people with CKD, as it may facilitate the support and regular interaction for dietary changes<sup>8</sup> Participants felt that the frequent contact via calls and text messages reinforced rapport and built a supportive relationship between participant and coach, which in turn, enabled stronger social accountability and progressive dietary change.

The successful recruitment and retention of participants enrolled in the ENTICE trial demonstrated feasibility. Although it is important to consider the trial only had a 35% recruitment rate, the feasibility was strengthened by the successful recruitment in the anticipated six-month recruitment period and very low attrition rate (5%) at six-months. Attrition is a common problem in studies of self-management in CKD, which is reported as between 11 to 39%, and which reduces the generalizability of findings, particularly given the often underpowered sample sizes of trials of lifestyle interventions in CKD.<sup>35</sup>

The intensive coaching intervention had a high call completion rate (90%) and high intervention adherence. This is similar to the 90% call completion rates reported in other telehealth studies in

1 weight management,<sup>36</sup> breast cancer,<sup>37</sup> younger adults in the general population,<sup>38</sup> and CKD studies.<sup>39</sup>  
2  
3  
4 A study involving 436 participants with CKD in the UK, who received a combination of interactive  
5  
6 web-based resources and telephone follow-up demonstrated successful recruitment, retention and  
7  
8 intervention satisfaction.<sup>39</sup> There was no specific dietary education provided to participants in that  
9  
10 study, however the community support intervention, provided through a workbook, online portal, and  
11  
12 telephone follow-up demonstrated a 69% recruitment rate, and had 85% retention at the six-month  
13  
14 follow up. Participants reported over 80% usefulness for the workbook, 62% for the telephone calls  
15  
16 and 23% for the interactive website.<sup>39</sup> Considering the limited evidence on lifestyle interventions in  
17  
18 CKD specifically, the findings from this trial support the feasibility of using telehealth coaching to  
19  
20 support dietary self-management of CKD. The major difference between the study conducted by  
21  
22 Blakeman and colleagues<sup>39</sup> and the ENTICE-CKD study was that recruitment occurred in general  
23  
24 practices compared to tertiary hospitals in our study. Our patient-engagement work highlighted the  
25  
26 desire of people with CKD for preventative diet and lifestyle advice in the early stages of CKD, before  
27  
28 it became a clinical issue.<sup>10</sup> This possibly explains the higher recruitment rate in the primary care  
29  
30 study by Blakeman and colleagues (69%) compared to our study in the tertiary hospital setting (35%).  
31  
32  
33  
34  
35  
36  
37  
38  
39  
40 Overall, there is limited evidence on the acceptability of telehealth dietary interventions in CKD.<sup>40</sup> A  
41  
42 pilot study in 47 CKD participants demonstrated over 80% user adherence and satisfaction with a  
43  
44 smart-phone self-management support program to support the self-monitoring of blood pressure,  
45  
46 medications, symptom recognition, and biochemistry.<sup>41</sup> In contrast, another study found that text-  
47  
48 message based interventions were the least preferred telehealth intervention for medication  
49  
50 monitoring by CKD participants, compared with web-based or personal digital assistant-based  
51  
52 applications.<sup>42</sup> The Effects of Sodium Modification on Outcome (ESMO) study, a three-month self-  
53  
54 management intervention in 138 adults with CKD which provided one-to-one sessions and telephone  
55  
56 support, demonstrated relatively high (63%) satisfaction from participants. It has been postulated that  
57  
58 a key factor for the high acceptability of the ESMO intervention was the patient-engagement utilized  
59  
60

1  
2 in the design of the trial.<sup>43</sup> This was an approach also taken in the ENTICE-CKD study. We have  
3  
4 previously found that patients with CKD have been confused by dietary advice and need more  
5  
6 frequent contact to support dietary change.<sup>10</sup> They were willing to participate in telephone calls and  
7  
8 receive text messages, as these were viewed within their comfort zone and levels of digital literacy,<sup>10</sup>  
9  
10 but also raised concerns about the credibility, safety, and lack of personalization in mobile apps and  
11  
12 internet modalities. The ENTICE-CKD program was developed from the key results in this focus  
13  
14 group study, which assured a patient-centred approach.<sup>44</sup>  
15  
16  
17  
18  
19

20 Previous thematic synthesis has shown that people with CKD experience many challenges in relation  
21  
22 to achieving their dietary and fluid recommendations. People express a preference for regular  
23  
24 coaching, feedback and monitoring to help them understand dietary information and become  
25  
26 confident in their ability to self-monitor and manage such changes.<sup>8</sup> The ENTICE-CKD program was  
27  
28 designed to foster incremental dietary advice, with each individual call being dedicated to a separate  
29  
30 topic. Each call was also tailored and flexible to participants' goals for dietary change. These  
31  
32 attributes may also help explain the difference observed in the acceptability compared to the non-  
33  
34 tailored education only (control) intervention.  
35  
36  
37  
38  
39

40 There are limitations to this study. As we had a 35% recruitment rate, the feasibility and acceptability  
41  
42 only relate to the participants enrolled in this pilot, thus the feasibility for the uptake of the program  
43  
44 and its generalizability in clinical practice are unknown. Furthermore, the baseline health literacy was  
45  
46 'good' in over 90 percent of our participants, which is likely greater than the health literacy of the  
47  
48 wider CKD population.<sup>45</sup> While other demographics of the people who participated in the ENTICE-  
49  
50 CKD study were broadly representative of the CKD demographic reported in international  
51  
52 comparisons,<sup>46-48</sup> we note that previous work has shown that approximately 20-25% have low health  
53  
54 literacy,<sup>49</sup> while only 10% of our study's participants had low health literacy. We speculate that it is  
55  
56 possible that our estimate of health literacy may be inflated due to the single-item questionnaire  
57  
58 having poorer sensitivity for people with marginal reading ability.<sup>50</sup> Future studies should consider  
59  
60

1  
2 the use of a skill-based health literacy questionnaire, such as the Newest Vital Sign, which might  
3  
4 better detect poor levels of health literacy in this population.<sup>51</sup> We also acknowledge that we captured  
5  
6 the individual participant adherence to the intervention using qualitative methods rather than  
7  
8 validated surveys. However, given the primary outcome of feasibility, qualitative methods were used  
9  
10 to minimize the over-use of self-report surveys and participant burden and this was an exploratory  
11  
12 measure of intervention adherence only. Using this method, we were able to capture to reasons for  
13  
14 adherence (and non-adherence). We also did not recruit children into the ENTICE-CKD study, so our  
15  
16 results are not generalizable to children with CKD. Finally, we did not interview participants in the  
17  
18 non-tailored education-only (control) group, and thus could not ascertain the reasons for lower  
19  
20 acceptability compared with the intervention group.  
21  
22  
23  
24  
25  
26

27 There are several adaptations which should be considered for a future trial based on the findings of this  
28  
29 feasibility and acceptability study. Firstly, the generalizability of the study sample could be improved  
30  
31 by recruiting participants from primary care (including general practices) and public and private  
32  
33 nephrology units. This may improve the recruitment rate, targeting people who are potentially more  
34  
35 motivated to change their diets compared to those who have been in the nephrology service for many  
36  
37 years. There is also more opportunity for people to consult with a dietitian in specialized nephrology  
38  
39 services, evident by 6% of people who declined to participate doing so because they were already  
40  
41 seeing a dietitian. Secondly, the number and structure of the coaching calls could be modified. All  
42  
43 participants who completed call 1 went on to complete at least 4 calls, however reasons for missing  
44  
45 the final two calls did vary and these calls were most commonly used for check-in and review of  
46  
47 participant goals only. This could therefore be done at the participant's discretion and to give  
48  
49 participants more flexibility, which was a key reason for the ENTICE-CKD program's acceptability.  
50  
51 Lastly, due to the unexpectedly large volume of over 1,000 'unrecognized' text messages sent by  
52  
53 participants, a larger trial would be required to adapt the program to provide an automated response  
54  
55 in these instances.  
56  
57  
58  
59  
60

1  
2 In conclusion, the ENTICE-CKD dietary coaching program is a feasible and acceptable intervention  
3  
4 for adults with stage 3-4 CKD. The program facilitated self-monitoring and encouraged the adoption  
5  
6 of goal setting throughout the intensive coaching period. Findings from this study are promising for  
7  
8 the use of telehealth to modify dietary practices in future clinical practice and research. However,  
9  
10 longer-term studies are needed to determine the safety, clinical effectiveness, and sustainability  
11  
12 before the wider implementation of the ENTICE-CKD program is appropriate. This process  
13  
14 evaluation can be used by clinicians to inform frequent and structured contact through telephone-  
15  
16 based and text message platforms to support the complex dietary self-management required for  
17  
18 people with CKD.  
19  
20  
21  
22  
23  
24  
25  
26  
27  
28  
29  
30  
31  
32  
33  
34  
35  
36  
37  
38  
39  
40  
41  
42  
43  
44  
45  
46  
47  
48  
49  
50  
51  
52  
53  
54  
55  
56  
57  
58  
59  
60

For peer review only



## REFERENCES

1. Bello AK, Levin A, Tonelli M, et al. Assessment of global kidney health care status. *Journal of the American Medical Association* 2017;317(18):1864-81. doi: 10.1001/jama.2017.4046
2. Chen T, Harris DC. Challenges of chronic kidney disease prevention. *Med J Aust* 2015;203(5):209-10.
3. Steiber AL. Chronic kidney disease: considerations for nutrition interventions. *JPEN J Parenter Enteral Nutr* 2014;38(4):418-26. doi: 10.1177/0148607114527315
4. Ash S, Campbell KL, Bogard J, et al. Nutrition prescription to achieve positive outcomes in chronic kidney disease: a systematic review. *Nutrients* 2014;6(1):416-51. doi: 10.3390/nu6010416
5. Kelly JT, Rossi M, Johnson DW, et al. Beyond sodium, phosphate and potassium: Potential dietary interventions in kidney disease. *Semin Dialysis* 2017;30(3):197-202. doi: 10.1111/sdi.12580
6. Kelly JT, Palmer SC, Wai SN, et al. Healthy dietary patterns and risk of mortality and ESRD in CKD: A meta-analysis of cohort studies. *Clin J Am Soc Nephrol* 2017;12(2):272-79. doi: 10.2215/CJN.06190616
7. Wai SN, Kelly JT, Johnson DW, et al. Dietary patterns and clinical outcomes in chronic kidney disease: The CKD.QLD nutrition study. *J Ren Nutr* 2017;27(3):175-82. doi: 10.1053/j.jrn.2016.10.005
8. Palmer SC, Hanson CS, Craig JC, et al. Dietary and fluid restrictions in CKD: A thematic synthesis of patient views from qualitative studies. *American Journal of Kidney Diseases* 2014;65(4):559-73. doi: 10.1053/j.ajkd.2014.09.012
9. Hand RK, Steiber A, Burrowes J. Renal dietitians lack time and resources to follow the NKF KDOQI guidelines for frequency and method of diet assessment: results of a survey. *Journal of Renal Nutrition* 2013;23(6):445-49.
10. Kelly JT, Campbell KL, Hoffmann T, et al. Patient experiences of dietary management in chronic kidney disease: a focus group study. *Journal of Renal Nutrition* 2017
11. Kelly J, Reidlinger D, Hoffman T, et al. Telehealth methods to deliver dietary interventions in adults with chronic disease: a systematic review and meta-analysis, 2016.
12. Beall RF, Baskerville N, Golfam M, et al. Modes of delivery in preventive intervention studies: a rapid review. *Eur J Clin Invest* 2014;44(7):688-96. doi: 10.1111/eci.12279
13. Desroches S, Lapointe A, Ratte S, et al. Interventions to enhance adherence to dietary advice for preventing and managing chronic diseases in adults. *Cochrane Database of Systematic Reviews* 2013;2:Cd008722. doi: 10.1002/14651858.CD008722.pub2
14. Direito A, Dale LP, Shields E, et al. Do physical activity and dietary smartphone applications incorporate evidence-based behaviour change techniques? *BMC Pub health* 2014;14(1):646. doi: <http://10.1186/1471-2458-14-646>
15. Goode AD, Reeves MM, Eakin EG. Telephone-delivered interventions for physical activity and dietary behavior change: an updated systematic review. *Am J Prev Med* 2012;42(1):81. doi: <http://10.1016/j.amepre.2011.08.025>
16. Norman GJ, Zabinski MF, Adams MA, et al. A Review of eHealth Interventions for Physical Activity and Dietary Behavior Change. *Am J Prev Med* 2007;33(4):336-45.e16. doi: <http://10.1016/j.amepre.2007.05.007>
17. Spark CL, Fjeldsoe SB, Eakin GE, et al. Efficacy of a text message-delivered extended contact intervention on maintenance of weight loss, physical activity, and dietary behavior change. *JMIR mHealth uHealth* 2015;3(3):e88. doi: 10.2196/mhealth.4114
18. Fjeldsoe B, Neuhaus M, Winkler E, et al. Systematic review of maintenance of behavior change following physical activity and dietary interventions. *Health psychology : official journal of the Division of Health Psychology, American Psychological Association* 2011;30(1):99.
19. Hall AK, Cole-Lewis H, Bernhardt JM. Mobile text messaging for health: a systematic review of reviews. *Annu Rev Public Health* 2015;36:393.
20. Chow CK, Redfern J, Hillis GS, et al. Effect of lifestyle-focused text messaging on risk factor modification in patients with coronary heart disease: a randomized clinical trial. *Journal of the American Medical Association* 2015;314(12):1255-63 9p. doi: 10.1001/jama.2015.10945
21. Bobrow K, Farmer AJ, Springer D, et al. Mobile Phone Text Messages to Support Treatment Adherence in Adults With High Blood Pressure (StAR): A Single-Blind, Randomized Trial. *Circulation* 2016:CIRCULATIONAHA.115.017530.
22. Eldridge SM, Chan CL, Campbell MJ, et al. CONSORT 2010 statement: extension to randomised pilot and feasibility trials. *Pilot Feasibility Stud* 2016;2(1):64.

23. Bandura A. Social foundations of thought and action: A social cognitive theory: Prentice-Hall, Inc 1986.
24. NHMRC. Australian Dietary Guidelines. Canberra: National Health and Medical Research Council, Department of Health and Ageing, 2013.
25. Hoffmann TC, Glasziou PP, Boutron I, et al. Better reporting of interventions: template for intervention description and replication (TIDieR) checklist and guide. *The British Medical Journal* 2014;348 doi: <http://10.1136/bmj.g1687>
26. Australian Government Department of Health. Australia's physical activity and sedentary behaviour guidelines for adults (18-64 years). In: Health Do, ed.: Commonwealth of Australia,, 2014.
27. Whitlock EP, Orleans CT, Pender N, et al. Evaluating primary care behavioral counseling interventions: An evidence-based approach. *Am J Prev Med* 2002;22(4):267-84. doi: [https://doi.org/10.1016/S0749-3797\(02\)00415-4](https://doi.org/10.1016/S0749-3797(02)00415-4)
28. Microsoft Excel [program]. 14.4.5 version, 2011.
29. Fjeldsoe BS, Goode AD, Phongsavan P, et al. Evaluating the maintenance of lifestyle changes in a randomized controlled trial of the 'get healthy, stay healthy' program. *JMIR mHealth and uHealth* 2016;4(2):e42. doi: 10.2196/mhealth.5280 [published Online First: 2016/05/12]
30. ABS. Census of population and housing: Socio-economic indexes for areas (SEIFA), Australia, 2011. Australian Bureau of Statistics, 2015.
31. Morris NS, MacLean CD, Chew LD, et al. The single item literacy screener: Evaluation of a brief instrument to identify limited reading ability. *BMC family practice* 2006;7:21-21. doi: 10.1186/1471-2296-7-21
32. Lancaster GA, Dodd S, Williamson PR. Design and analysis of pilot studies: recommendations for good practice. *J Eval Clin Pract* 2004;10(2):307-12. doi: 10.1111/j.2002.384.doc.x [published Online First: 2004/06/11]
33. Vaismoradi M, Turunen H, Bondas T. Content analysis and thematic analysis: Implications for conducting a qualitative descriptive study. *Nurs Health Sci* 2013;15(3):398-405. doi: 10.1111/nhs.12048
34. Microsoft Word [program]. 14.4.5 version, 2011.
35. Welch JL, Johnson M, Zimmerman L, et al. Self-management interventions in stages 1-4 chronic kidney disease: an integrative review. *West J Nurs Res* 2015;37(5):652-78. doi: 10.1177/0193945914551007
36. Whelan ME, Goode AD, Eakin EG, et al. Feasibility, effectiveness and cost-effectiveness of a telephone-based weight loss program delivered via a hospital outpatient setting. *Translational behavioral medicine* 2016;6(3):386. doi: 10.1007/s13142-015-0337-9.
37. Spark LC, Fjeldsoe BS, Eakin EG, et al. Efficacy of a text message-delivered extended contact intervention on maintenance of weight loss, physical activity, and dietary behavior change. *JMIR mHealth and uHealth* 2015;3(3):e88. doi: 10.2196/mhealth.4114
38. Partridge SR, Allman-Farinelli M, McGeechan K, et al. Process evaluation of TXT2BFiT: a multi-component mHealth randomised controlled trial to prevent weight gain in young adults. *Int J Behav Nutr Phys Act* 2016;13(1):7.
39. Blakeman T, Blickem C, Kennedy A, et al. Effect of information and telephone-guided access to community support for people with chronic kidney disease: Randomised controlled trial. *Plos One* 2014;9(10):e109135. doi: 10.1371/journal.pone.0109135
40. Tuot DS, Boulware LE. Telehealth applications to enhance CKD knowledge and awareness among patients and providers. *Adv Chronic Kidney Dis* 2017;24(1):39-45. doi: 10.1053/j.ackd.2016.11.017
41. Ong SW, Jassal SV, Miller JA, et al. Integrating a smartphone-based self-management system into usual care of advanced CKD. *Clin J Am Soc Nephrol* 2016;11(6):1054-62. doi: 10.2215/cjn.10681015 [published Online First: 2016/05/14]
42. Diamantidis CJ, Zuckerman M, Fink W, et al. Usability testing and acceptance of an electronic medication inquiry system for CKD patients. *Am J Kid Dis* 2013;61(4):644-6. doi: 10.1053/j.ajkd.2012.09.016 [published Online First: 2012/11/20]
43. Campbell KL, Palmer SC, Johnson DW. Improving nutrition research in nephrology: an appetite for change. *Am J Kid Dis* 2017;69(5):558-60.
44. Domecq JP, Prutsky G, Elraiyah T, et al. Patient engagement in research: a systematic review. *BMC health services research* 2014;14(1):89. doi: 10.1186/1472-6963-14-89
45. Wright Nunes JA, Wallston KA, Eden SK, et al. Associations among perceived and objective disease knowledge and satisfaction with physician communication in patients with chronic kidney disease. *Kidney Int* 2011;80(12):1344-51. doi: 10.1038/ki.2011.240 [published Online First: 2011/08/13]
46. Hill NR, Fatoba ST, Oke JL, et al. Global Prevalence of Chronic Kidney Disease – A Systematic Review and Meta-Analysis. *PLoS ONE* 2016;11(7):e0158765. doi: 10.1371/journal.pone.0158765

- 1  
2 47. Mahmood U, Healy HG, Kark A, et al. Spectrum (characteristics) of patients with chronic kidney disease  
3 (CKD) with increasing age in a major metropolitan renal service. *BMC Nephrology* 2017;18:372. doi:  
4 10.1186/s12882-017-0781-5
- 5 48. Yang W, Xie D, Anderson AH, et al. Association of Kidney Disease Outcomes With Risk Factors for  
6 CKD: Findings From the Chronic Renal Insufficiency Cohort (CRIC) Study. *American journal of*  
7 *kidney diseases : the official journal of the National Kidney Foundation* 2014;63(2):236-43. doi:  
8 10.1053/j.ajkd.2013.08.028
- 9 49. Fraser SD, Roderick PJ, Casey M, et al. Prevalence and associations of limited health literacy in chronic  
10 kidney disease: a systematic review. *Nephrology Dialysis Transplantation* 2012;28(1):129-37.
- 11 50. Morris NS, MacLean CD, Chew LD, et al. The Single Item Literacy Screener: Evaluation of a brief  
12 instrument to identify limited reading ability. *BMC family practice* 2006;7(1):21. doi: 10.1186/1471-  
13 2296-7-21
- 14 51. Weiss BD, Mays MZ, Martz W, et al. Quick assessment of literacy in primary care: the newest vital sign.  
15 *The Annals of Family Medicine* 2005;3(6):514-22.  
16  
17  
18  
19  
20  
21  
22  
23  
24  
25  
26  
27  
28  
29  
30  
31  
32  
33  
34  
35  
36  
37  
38  
39  
40  
41  
42  
43  
44  
45  
46  
47  
48  
49  
50  
51  
52  
53  
54  
55  
56  
57  
58  
59  
60

1  
2 **LIST OF TABLES**  
3  
4

5 **Table 1.** Demographics of participants whom completed the six month ENTICE-CKD pilot study.  
6

7  
8 **Table 2.** Delivery and response of fortnightly telephone calls and text messages in ENTICE-CKD.  
9

10  
11 **Table 3.** Participant adherence to the ENTICE-CKD intervention. Data are presented as *n (%)*.  
12

13  
14 **Table 4.** Utility and acceptability of ENTICE-CKD text messages by participant group.  
15

16  
17 **Table 5.** Acceptability and feasibility of ENTICE-CKD program at completion of phase 1  
18  
19 (intervention group): qualitative content analysis of semi-structured interviews (n=21).  
20  
21  
22  
23  
24  
25  
26  
27  
28  
29  
30  
31  
32  
33  
34  
35  
36  
37  
38  
39  
40  
41  
42  
43  
44  
45  
46  
47  
48  
49  
50  
51  
52  
53  
54  
55  
56  
57  
58  
59  
60

For peer review only

1  
2 **LIST OF FIGURES**  
3  
4

5 **Figure 1.** Consort flow diagram showing the flow of participants through the ENTICE-CKD study.  
6  
7  
8  
9  
10  
11  
12  
13  
14  
15  
16  
17  
18  
19  
20  
21  
22  
23  
24  
25  
26  
27  
28  
29  
30  
31  
32  
33  
34  
35  
36  
37  
38  
39  
40  
41  
42  
43  
44  
45  
46  
47  
48  
49  
50  
51  
52  
53  
54  
55  
56  
57  
58  
59  
60

For peer review only

**Table 1.** Demographics of participants whom completed the six month ENTICE-CKD pilot study.

| <b>Characteristic</b>                    | <b>Intervention group (n=41)</b> | <b>Control group (n=39)</b> |
|------------------------------------------|----------------------------------|-----------------------------|
| <b>Male, n (%)</b>                       | <b>26 (63%)</b>                  | <b>25 (64%)</b>             |
| <b>Age (years)</b>                       | <b>62.0 ± 12.0</b>               | <b>61.1 ± 13.3</b>          |
| <b>Stage of chronic kidney disease</b>   |                                  |                             |
| 3a                                       | 10 (25%)                         | 15 (38%)                    |
| 3b                                       | 19 (46%)                         | 16 (41%)                    |
| 4                                        | 12 (29%)                         | 8 (21%)                     |
| <b>Body Mass Index, kg/m<sup>2</sup></b> | <b>33.4 ± 6.7</b>                | <b>31.0 ± 6.4</b>           |
| <b>Hypertension</b>                      | <b>34 (83%)</b>                  | <b>31 (80%)</b>             |
| <b>Diabetes</b>                          | <b>15 (37%)</b>                  | <b>16 (41%)</b>             |
| <b>Active smoker status</b>              | <b>21 (51%)</b>                  | <b>16 (41%)</b>             |
| <b>Ethnicity</b>                         |                                  |                             |
| Asian                                    | 2 (5%)                           | 1 (3%)                      |
| Caucasian/European                       | 37 (91%)                         | 32 (82%)                    |
| Indigenous                               | 1 (2%)                           | 0                           |
| Other                                    | 1 (2%)                           | 6 (15%)                     |
| <b>Education</b>                         |                                  |                             |
| Lower than 10 <sup>th</sup> grade        | 17 (42%)                         | 12 (32%)                    |
| Up to 12 <sup>th</sup> grade             | 4 (10%)                          | 10 (26%)                    |
| Tertiary educated                        | 20 (47%)                         | 16 (41%)                    |
| <b>Socio-economic status</b>             |                                  |                             |
| High                                     | 27 (66%)                         | 25 (64%)                    |
| <b>Health Literacy</b>                   |                                  |                             |
| Good                                     | 37 (90%)                         | 36 (92%)                    |

**Table 2.** Delivery and response of fortnightly telephone calls and text messages in ENTICE-CKD.

|                                                 | Intervention group |            | Control group |
|-------------------------------------------------|--------------------|------------|---------------|
|                                                 | Phase 1            | Phase 2    | Phase 2       |
| <b>TELEPHONE CALLS</b>                          |                    |            |               |
| Planned                                         | 234                | -          | -             |
| Actual                                          | 225                | -          | -             |
| Call attempts                                   | 290                | -          | -             |
| Missed calls, n (%)                             | 9 (3)              | -          | -             |
| Duration of initial calls, mins (mean± SD)      | 45±10              | -          | -             |
| Duration of follow up calls, mins (mean ± SD)   | 24±10              | -          | -             |
| Call scheduling text messages outgoing          | 245                | 57         | 0             |
| <b>TEXT MESSAGES – outgoing</b>                 |                    |            |               |
| Total intervention texts sent, per fortnight    | 1371               | 1980       | 1634          |
| Educational <sup>a</sup> , median(range)        | 2(0-6)             | 4(0-8)     | 6(0-13)       |
| Goal check <sup>b</sup> , median(range)         | 2(0-4)             | 3(0-5)     | -             |
| Self-monitoring <sup>c</sup> , median(range)    | 0(0-2)             | 2(0-5)     | -             |
| <b>TEXT MESSAGES – incoming</b>                 |                    |            |               |
| Total text responses                            | 437                | 608        | 55            |
| Recognized goal check responses, n (%)          | 174 (39.8)         | 226 (37.2) | 0             |
| Unrecognized responses                          | 263                | 382        | 55            |
| Requiring tailored text reply from coach, n (%) | 7 (2.7)            | 18 (4.7)   | 2 (3.6)       |

<sup>a</sup> Outcome expectations (providing information on consequence)

<sup>b</sup> Self-regulation

<sup>c</sup> Self-regulation (facilitate planned behaviour change)

**Table 3.** Participant adherence to the ENTICE intervention<sup>a</sup>.

| Adherence                        | Call 1               | Call 2           | Call 3-6   |
|----------------------------------|----------------------|------------------|------------|
| Total planned calls              | 39                   | 39               | 156        |
| Calls delivered, n (%)           | 39 (100)             | 38 (97)          | 148 (95)   |
| Number of missed calls, n (%)    | 0                    | 1 (3)            | 8 (5)      |
| Due to withdrawal from trial     |                      |                  | 2 (1)      |
| Due to travel                    |                      |                  | 2 (1)      |
| Other <sup>b</sup>               |                      | 1 (3)            | 4 (3)      |
| Goal setting, n (%)              | 38 (100)             | 10 (26)          | 23 (61)    |
| 1 goal                           | 2 (5)                | 8 (21)           | 12 (32)    |
| 2 goals                          | 36 (95)              | 2 (5)            | 7 (18)     |
| 3 goals                          | N/A <sup>c</sup>     | N/A <sup>c</sup> | 1 (3)      |
| 4 goals                          | N/A <sup>c</sup>     | N/A <sup>c</sup> | 3 (8)      |
| Self-monitoring, n (%)           | 22/38 (58)           | 29/38 (76%)      | 29/38 (76) |
| Implementation intentions, n (%) | 14 (37) <sup>d</sup> | 31 (82)          | 37 (97)    |
| Yes                              | 24 (63) <sup>d</sup> | 7 (18)           | 1 (3)      |
| No                               |                      |                  |            |

<sup>a</sup> – Data are presented as *n* (%).

<sup>b</sup> – 1 participant decided to get tailored text messages only following call 1

<sup>c</sup> - In each call only 2 goals could be set or updated.

<sup>d</sup> - Implementation intentions were not expected to be evident in the first call



**Table 4.** Utility and acceptability of ENTICE-CKD text messages by participant group<sup>a</sup>.

| Characteristic                                      | Tailored text messages | Non-tailored text-messages |
|-----------------------------------------------------|------------------------|----------------------------|
| <b>Usefulness and understanding</b>                 |                        |                            |
| Q1 - Useful in supporting dietary change            | 100%                   | 69%**                      |
| Q2 - Messages were easy to understand               | 100%                   | 100%                       |
| <b>Influence on motivation and behaviour change</b> |                        |                            |
| Q3 - Messages motivated change                      | 75%                    | 50%**                      |
| Q4 - Healthier diet due to messages                 | 81%                    | 61%                        |
| Q5 - Exercise increased due to messages             | 38%                    | 33%                        |
| <b>Message saving and sharing</b>                   |                        |                            |
| Q6 - Percent of messages read                       | 100%                   | 100%                       |
| Q7 - Saved messages                                 | 81%                    | 72%                        |
| Q8 - Shared messages                                | 56%                    | 67%                        |
|                                                     | Family member          | 71%                        |
|                                                     | Friend                 | 12%                        |
|                                                     | Health provider        | 12%                        |
| <b>Appropriate message characteristics</b>          |                        |                            |
| Q9 - Suitable language                              | 100%                   | 100%                       |
| Q10 - Texts were not too regular                    | 94%                    | 86%                        |
| Q11 - Program length (six months)                   | 88%                    | 78%                        |
| Q12 - Appropriate time of the day/night             | 100%                   | 94%                        |

<sup>a</sup> - Response rate for this survey was 73 out of 80 participants (91%), tailored text messages (n=43), non-tailored text messages (n=39).

\*\* - p<0.01 between groups

**Table 5.** Acceptability and feasibility of ENTICE-CKD program at completion of phase 1 (intervention group): qualitative content analysis of semi-structured interviews (n=21)

| Category                           | Attributes                                                                                                                                                                                                                                                                                                                                                                              | Quote                                                                                                                                                                                                                                                                                                                                                                                                                                       |
|------------------------------------|-----------------------------------------------------------------------------------------------------------------------------------------------------------------------------------------------------------------------------------------------------------------------------------------------------------------------------------------------------------------------------------------|---------------------------------------------------------------------------------------------------------------------------------------------------------------------------------------------------------------------------------------------------------------------------------------------------------------------------------------------------------------------------------------------------------------------------------------------|
| <b>Acceptability</b>               |                                                                                                                                                                                                                                                                                                                                                                                         |                                                                                                                                                                                                                                                                                                                                                                                                                                             |
| Acceptable alternative to clinic   | <ul style="list-style-type: none"> <li>- Overcomes clinic wait times, transport logistics</li> <li>- Flexibility of phone call appointment times</li> <li>- Preferred talking from a familiar environment and not feeling rushed</li> <li>- No identified disadvantages of telehealth communication vs face-to-face</li> </ul>                                                          | <p><i>“At home I’m more relaxed and I have the book in front of me and I was able to jot down anything that was important, if I was at the hospital there’s so many people around and you don’t feel very relaxed, you feel like everyone is listening to your conversation, so you don’t say personal information”</i> Female, 69</p>                                                                                                      |
| Preference for voice communication | <ul style="list-style-type: none"> <li>- Building rapport with coach</li> <li>- More benefit from voice calls</li> <li>- Frequency of fortnightly phone calls</li> </ul>                                                                                                                                                                                                                | <p><i>“I found the calls better than the texts ... they were more personable and kept me on track”</i> Female, 68</p>                                                                                                                                                                                                                                                                                                                       |
| Regular contact via text message   | <ul style="list-style-type: none"> <li>- Text messages were an acceptable mode of communicating information</li> <li>- Preference for receiving text messages with personal encouragement <i>and</i> general tips</li> </ul>                                                                                                                                                            | <p><i>“We solved a lot of my little issues, and it’s given me a lot better understanding, and you know the more you think about it and communicate about it, ah the better it is”</i> Male, 71</p>                                                                                                                                                                                                                                          |
| Personalized messages valued       | <ul style="list-style-type: none"> <li>- All text messages were acceptable</li> <li>- Health professional expertise</li> <li>- Usefulness of coordinated nutrition advice</li> <li>- Removal of multiple conflicting nutrition recommendations</li> </ul>                                                                                                                               | <p><i>“It’s given me simple tasks, simple methods, or methodologies, to improve the situation, and they’re not a whole lot of gobbledygook, just basic stuff that we can understand.”</i> Male, 65</p>                                                                                                                                                                                                                                      |
| <b>Feasibility</b>                 |                                                                                                                                                                                                                                                                                                                                                                                         |                                                                                                                                                                                                                                                                                                                                                                                                                                             |
| Program integrated into lifestyle  | <ul style="list-style-type: none"> <li>- Length of phone calls easily accommodated</li> <li>- 12-week telephone intervention enough time for change</li> <li>- Self-monitoring the behavior of choice</li> </ul>                                                                                                                                                                        | <p><i>“As long as you’re getting information backwards and forwards, that’s the more important thing than the length of the call, it’s what you’re getting out of it”</i> Male, 78</p>                                                                                                                                                                                                                                                      |
| Diverse delivery modes             | <ul style="list-style-type: none"> <li>- Active learning from a range of understandable delivery modes</li> <li>- Hard copy workbook as reference tool</li> <li>- Receiving explanations develops understanding and awareness of reasons for dietary change</li> <li>- Quantifiable dietary recommendations (food groups, “good vs bad” foods, portion sizes, sodium levels)</li> </ul> | <p><i>“You’ve got to eat these foods, food groups and that, but you don’t actually know the right quantities ... this program shows it to you and it’s like, it’s teaching someone how to walk again”</i> Male, 46</p> <p><i>“The book I think was brilliant, because you’ve got that to go back through all the time, well any time you’re doubtful you’ve got thoughts, you just look at the book, I did, I still do it”</i> Male, 64</p> |

1  
2  
3  
4  
5  
6  
7  
8  
9  
10  
11  
12  
13  
14  
15  
16  
17  
18  
19  
20  
21  
22  
23  
24  
25  
26  
27  
28  
29  
30  
31  
32  
33  
34  
35  
36  
37  
38  
39  
40  
41  
42  
43  
44  
45  
46  
47  
48  
49  
50  
51  
52  
53  
54  
55  
56  
57  
58  
59  
60

| Category                                | Attributes                                                                                                                                                                                                                                                                                                         | Quote                                                                                                                                                                                                                                                                                                                                                |
|-----------------------------------------|--------------------------------------------------------------------------------------------------------------------------------------------------------------------------------------------------------------------------------------------------------------------------------------------------------------------|------------------------------------------------------------------------------------------------------------------------------------------------------------------------------------------------------------------------------------------------------------------------------------------------------------------------------------------------------|
| Social accountability                   | <ul style="list-style-type: none"> <li>- Supportive relationship with one coach allows progressive dietary change</li> <li>- Frequent reminders and reinforcing goals</li> <li>- Interaction with coach via text messages</li> </ul>                                                                               | <p><i>"If I didn't have the phone calls from [my coach] once a fortnight I probably wouldn't have taken it as serious as I have"</i> Male, 65</p> <p><i>"The support, even just texting and that, it's still, you know someone's doing it. It's, it just makes you feel better as a person, to know someone cares"</i> Male, 64</p>                  |
| Responding to dietary advice            | <ul style="list-style-type: none"> <li>- Small changes at a time</li> <li>- Practical strategies, manipulating environment to support behaviors, skill development (label reading)</li> <li>- Setting goals and finding satisfaction in quantifiable outcomes (e.g. portion sizes, food group servings)</li> </ul> | <p><i>"The program is delivered in segments, you're just having a bit of information at a time, so it's not overwhelming"</i> Female, 68</p> <p><i>"I was astounded at the salt content of it all, so when I read that I immediately stopped all salt that I put on my plate ... I've not had salt since, so that was 3 months ago"</i> Male, 65</p> |
| Infeasible elements beyond intervention | <ul style="list-style-type: none"> <li>- Physical comorbidities a barrier for lifestyle component of program</li> <li>- Lack of support from others with poor understanding or low interest</li> <li>- Unstable or unsupportive environment for creating healthy habits</li> </ul>                                 | <p><i>"I have just been moving around a lot more and not in a stable environment of being in familiar surroundings, being unable to replicate ... the menus ... due to my transient nature of where I am presently"</i> Male, 46</p>                                                                                                                 |

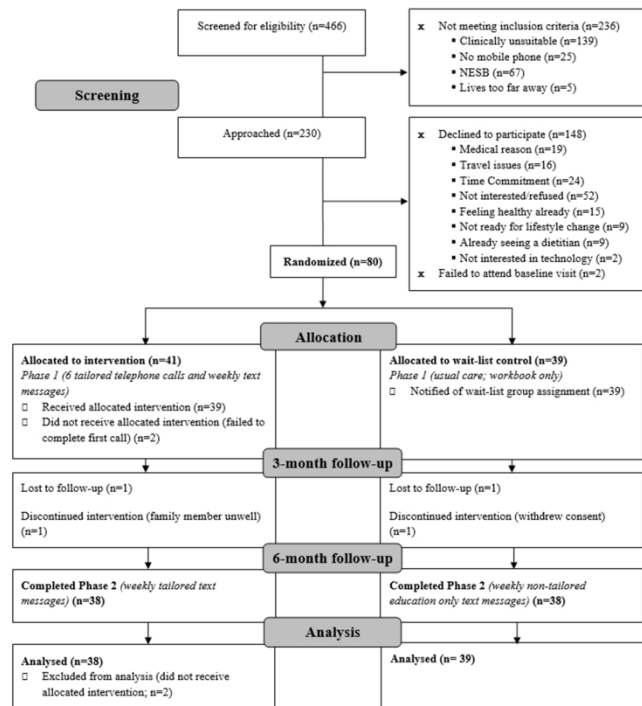

Figure 1. Consort flow diagram showing the flow of participants through the ENTICE-CKD study.

Figure 1

254x190mm (300 x 300 DPI)

## SUPPLEMENTARY MATERIALS

**Supplementary Table 1.** Dietary targets adopted in the ENTICE-CKD intervention workbook, telephone calls and text messages<sup>1</sup>.

| Food group                  | Dietary target (serves/day) | Considerations                                  |
|-----------------------------|-----------------------------|-------------------------------------------------|
| Grains/cereals              | 3-6 (>50% whole grain)      | Replacing refined carbohydrates for wholegrains |
| Vegetables and fruit        | 5-7                         | Low potassium alternatives as appropriate       |
| Low fat dairy               | 2                           | 250mL milk, 40g cheese, 200g yoghurt            |
| Lean meat, poultry and fish | <2 (130-200g)               | Modified for protein (aiming for 1.0 g/kg/day)  |
| Fats and oils               | 20 to 40g                   | Emphasise healthy oils                          |
| Dietary sodium              | <100mmol/day (6g salt)      | Replace takeaway and processed foods for fresh  |
| Added sugars                | <10% total calorie intake   | food and healthy cooking methods                |
| Discretionary choices       | <2                          | Limit where possible                            |

Abbreviations – g: grams, kg: kilogram, mL: millilitre.

**Supplementary Table 2.** Description of the intervention according to the TIDieR checklist.<sup>2</sup>

| Item Name/Number                                                                                                                                                                                                                                                                                                                                                                                                                                                                                     | Item Description                                                                                                                                                                                                                                                                                                                                                                                                                                                                                                                                                              |
|------------------------------------------------------------------------------------------------------------------------------------------------------------------------------------------------------------------------------------------------------------------------------------------------------------------------------------------------------------------------------------------------------------------------------------------------------------------------------------------------------|-------------------------------------------------------------------------------------------------------------------------------------------------------------------------------------------------------------------------------------------------------------------------------------------------------------------------------------------------------------------------------------------------------------------------------------------------------------------------------------------------------------------------------------------------------------------------------|
| <b>Item 1: Brief name</b>                                                                                                                                                                                                                                                                                                                                                                                                                                                                            |                                                                                                                                                                                                                                                                                                                                                                                                                                                                                                                                                                               |
| ENTICE-CKD                                                                                                                                                                                                                                                                                                                                                                                                                                                                                           |                                                                                                                                                                                                                                                                                                                                                                                                                                                                                                                                                                               |
| <b>Item 2: Why</b>                                                                                                                                                                                                                                                                                                                                                                                                                                                                                   |                                                                                                                                                                                                                                                                                                                                                                                                                                                                                                                                                                               |
|                                                                                                                                                                                                                                                                                                                                                                                                                                                                                                      | Telehealth intervention may support patients with stage 3-4 CKD to improve their diet quality through access to education, coaching and regular contact with a health professional. Improving access to dietary education may assist people with stage 3-4 CKD reduce their dietary sodium intake <100mmol/day and improve their overall diet quality in line with the Australian Dietary Guidelines. <sup>1</sup> These dietary changes are complex and different levels of telehealth tailoring and intensity may be needed to support and sustain dietary behavior change. |
| <b>Item 3: What</b>                                                                                                                                                                                                                                                                                                                                                                                                                                                                                  |                                                                                                                                                                                                                                                                                                                                                                                                                                                                                                                                                                               |
| <b>ENTICE-CKD program workbook</b>                                                                                                                                                                                                                                                                                                                                                                                                                                                                   |                                                                                                                                                                                                                                                                                                                                                                                                                                                                                                                                                                               |
| About ENTICE                                                                                                                                                                                                                                                                                                                                                                                                                                                                                         | Introduction page “The focus of the ENTICE program is to help you make gradual changes to your eating and physical activity habits that work for YOU – changes that become lifelong.”                                                                                                                                                                                                                                                                                                                                                                                         |
| <b>Section 1:</b> Setting your goals and keeping track                                                                                                                                                                                                                                                                                                                                                                                                                                               | “Use the following steps every time you set a SMART goal...”                                                                                                                                                                                                                                                                                                                                                                                                                                                                                                                  |
| <b>Section 2:</b> Eating well for healthy kidneys                                                                                                                                                                                                                                                                                                                                                                                                                                                    | “The ENTICE program will help you to gradually make changes to your diet to meet the daily recommended serves of fruit, vegetables and wholegrain breads/cereals.”                                                                                                                                                                                                                                                                                                                                                                                                            |
| <b>Section 3:</b> Active living                                                                                                                                                                                                                                                                                                                                                                                                                                                                      | “Participating in regular physical activity and reducing sitting time is very important for your health and well-being.”                                                                                                                                                                                                                                                                                                                                                                                                                                                      |
| <b>Section 4:</b> Why is healthy eating important for my kidneys?                                                                                                                                                                                                                                                                                                                                                                                                                                    | Did you know? “Less than 4% of the Australians meet the recommended daily intake for vegetables. Research has shown that increasing your intake of vegetables by as little as ONE serve per day can help you live longer and stronger.”                                                                                                                                                                                                                                                                                                                                       |
| <b>Section 5:</b> Plan for success                                                                                                                                                                                                                                                                                                                                                                                                                                                                   | “There are a number of things that affect what we eat and our overall energy intake. It is important to be aware of, pay attention to and plan for: How you eat; Where/why you eat?”                                                                                                                                                                                                                                                                                                                                                                                          |
| <b>Section 6:</b> Self-monitoring and setting goals                                                                                                                                                                                                                                                                                                                                                                                                                                                  | Smart snacking<br>Reflections<br>Tracking my food intake                                                                                                                                                                                                                                                                                                                                                                                                                                                                                                                      |
| <b>Section 7:</b> Additional healthy eating resources                                                                                                                                                                                                                                                                                                                                                                                                                                                | Useful websites; Healthy recipes<br>Useful apps for mobiles or tablets<br>High/low potassium/phosphate foods (if required)<br>Healthier verse unhealthy takeaway options                                                                                                                                                                                                                                                                                                                                                                                                      |
| <b>Item 4: What – procedures</b>                                                                                                                                                                                                                                                                                                                                                                                                                                                                     |                                                                                                                                                                                                                                                                                                                                                                                                                                                                                                                                                                               |
| <b>Phase 1:</b> Intensive coaching using telephone calls and tailored text messages.<br>Each call was designed to align with each section of the workbook, and structured based on the 5As framework (Assess, Advise, Agree, Assist, Arrange). <sup>3</sup> The overall sequence of calls had the purpose of aligning participants’ diets with a reduced dietary sodium intake to <100mmol/day and improving their overall diet quality in line with the Australian Dietary Guidelines. <sup>1</sup> |                                                                                                                                                                                                                                                                                                                                                                                                                                                                                                                                                                               |
| <b>Intervention calls</b>                                                                                                                                                                                                                                                                                                                                                                                                                                                                            |                                                                                                                                                                                                                                                                                                                                                                                                                                                                                                                                                                               |
| <b>Call 1</b>                                                                                                                                                                                                                                                                                                                                                                                                                                                                                        |                                                                                                                                                                                                                                                                                                                                                                                                                                                                                                                                                                               |
|                                                                                                                                                                                                                                                                                                                                                                                                                                                                                                      | <ul style="list-style-type: none"> <li>• Welcome to ENTICE-CKD</li> <li>• Information about the program</li> <li>• Feedback on baseline outcome measures</li> <li>• Complete Section 1 – goal setting</li> <li>• Discuss section 6 – self monitoring</li> <li>• Begin section 2 - introduction the five food groups</li> </ul>                                                                                                                                                                                                                                                |
| <b>Call 2</b>                                                                                                                                                                                                                                                                                                                                                                                                                                                                                        |                                                                                                                                                                                                                                                                                                                                                                                                                                                                                                                                                                               |
|                                                                                                                                                                                                                                                                                                                                                                                                                                                                                                      | <ul style="list-style-type: none"> <li>• Revisit goals</li> </ul>                                                                                                                                                                                                                                                                                                                                                                                                                                                                                                             |

- Recap Australia Guide to Healthy Eating – answer any questions
- Continue section 2 – (plate model, snacks, salt, label reading, potassium and phosphate)

**Call 3**

- Revisit goals
- Answer any questions on healthy eating
- Complete section 3 – Active living

**Call 4**

- Revisit goals
- Revisit any questions about active living/ healthy eating
- Complete section 4 – Why is healthy eating important for my kidneys
- Complete section 5 - planning for success - how why and where you eat and managing slips

**Call 5**

- Revisit goals
- Answer any dietary or Active living questions
- Discuss section 7 - additional information / resources

**Call 6**

- Revisit goals
- Revisit any questions participant may have
- Discuss where to from here
- Adjust text message frequency if desired

**Text message component**

| Text message type           | SCT                  | Example text                                                                                                                                | Intervention     |                  | Control         |                  |
|-----------------------------|----------------------|---------------------------------------------------------------------------------------------------------------------------------------------|------------------|------------------|-----------------|------------------|
|                             |                      |                                                                                                                                             | Phase 1          | Phase 2          | Phase 1         | Phase 2          |
| Education                   | Outcome expectations | Dietary fibre intake reduces ur cholesterol levels and controls ur blood sugar. Include wholegrain breads & cereals, fruits & veg regularly | 2-6              | 1-4              | NA <sup>a</sup> | 6-8              |
| Self-monitor                | Self-regulation      | Hi [name], are u keeping track of ur fruit/vegetable intake every day? Remember ur goal to have 5 serves this week                          | 0-2              | 1-4              | NA              | NA               |
| Goal check                  | Self-regulation      | Hi [name], did you reach ur goal to eat 5 fruits/vegetables 4 times this week? Text me back yes or no to let me know                        | 2                | 2-4              | NA              | NA               |
| Education (Safety protocol) | Low potassium diet   | Choose high fibre, low potassium breakfast cereals. Good choices are Multigrain Weetbix, Rolled Oats, Guardian, Oatbritz, Special K         | 0-2 <sup>a</sup> | 0-2 <sup>a</sup> | NA              | 0-2 <sup>a</sup> |

**Phase 2:** Extended contact using tailored text messages only.

At the end of phase 1 (3 month study mid-point), participants completed their final coaching call and discussed their preferences for the timing and frequency of the phase 2 text messages. At 18 weeks, participants received another tailoring call (no dietary coaching) to make individualized adjustments to their text message timing and frequency for the remaining 6 weeks of the intervention.

**Item 5: Provider**

Two accredited practicing dietitians (RD equivalent) with additional training in behavior change, motivational interviewing and renal nutrition. Each participant in the intervention was assigned to one dietitian for the duration of the intervention.

**Item 6: How**

Phase 1 (month 0-3) **Intervention:** One-to-one coaching provided through 6 fortnightly phone calls, and tailored text messages at a frequency requested by the participant (TIDieR item 4 – Text message component).

Phase 2 (month 3-6) **Intervention:** Tailored text messages at a frequency requested by the participant (TIDieR item 4 – Text message component).

**Item 7: Where**

Participants were in locations of their choosing as the intervention was delivered by telephone/mobile.

**Item 8: When and How Much**

**Phone calls:** Intervention group participants received fortnightly phone calls for 3 months

**Text messages:** Intervention participants received fortnightly text messages for 6 months. Control group participants received text messages for 3 months (TIDieR item 4 – Text message component).

**Item 9: Tailoring**

**Phone calls:** Coaches could tailor the dietary guidelines to participants' individual comorbidities and goals.

1  
2  
3 Coaches documented any tailoring to the intervention in call logs.

4 Text messages: Tailored text messages were tailored to participants' names, set goals and barriers to  
5 achieving each goal (examples can be seen under TIDieR item 4 – Text message component).

6 **Item 10: Modifications**

7 Some participants who replied to the goal check text messages in a way the system could not recognize (i.e.  
8 not a yes/no response) were giving a tailored goal check reply message instead of the automatic system  
9 generated reply. No other modifications were made to the intervention during the course of the study.

10 <sup>a</sup> Abbreviations: SCT: Social Cognitive Theory; Each text message utilized common abbreviations to reduce  
11 character counts. For example 'ur' refers to 'your', 'u' refers to 'you'.

12 <sup>b</sup> Phase 1 was from baseline to three months. Phase 2 was from three months to the six month study end-point

13 <sup>c</sup> NA = not applicable

14 <sup>d</sup> Educational permutations were only available for coaches to use if a participant experienced hyperkalaemia or  
15 hyperphosphataemia  
16  
17  
18  
19  
20  
21  
22  
23  
24  
25  
26  
27  
28  
29  
30  
31  
32  
33  
34  
35  
36  
37  
38  
39  
40  
41  
42  
43  
44  
45  
46  
47  
48  
49  
50  
51  
52  
53  
54  
55  
56  
57  
58  
59  
60



**Supplement Table 3.** Utility and acceptability questionnaire completed at 6 months.

| Thinking about the text message component of the ENTICE intervention; please answer the following questions (part A). |                                                                                                                                                                                                                                                                                         |
|-----------------------------------------------------------------------------------------------------------------------|-----------------------------------------------------------------------------------------------------------------------------------------------------------------------------------------------------------------------------------------------------------------------------------------|
| 1.                                                                                                                    | The text messages sent to me were useful in supporting me make a dietary change?<br><input type="radio"/> Strongly agree<br><input type="radio"/> Agree<br><input type="radio"/> Neither agree or disagree<br><input type="radio"/> Disagree<br><input type="radio"/> Strongly disagree |
| 2.                                                                                                                    | The text messages sent to me were easy to understand?<br><input type="radio"/> Strongly agree<br><input type="radio"/> Agree<br><input type="radio"/> Neither agree or disagree<br><input type="radio"/> Disagree<br><input type="radio"/> Strongly disagree                            |
| 3.                                                                                                                    | The text messages sent to me motivated me to change my diet<br><input type="radio"/> Strongly agree<br><input type="radio"/> Agree<br><input type="radio"/> Neither agree or disagree<br><input type="radio"/> Disagree<br><input type="radio"/> Strongly disagree                      |
| 4.                                                                                                                    | The text messages sent to me made me eat healthier?<br><input type="radio"/> Strongly agree<br><input type="radio"/> Agree<br><input type="radio"/> Neither agree or disagree<br><input type="radio"/> Disagree<br><input type="radio"/> Strongly disagree                              |
| 5.                                                                                                                    | The text messages sent to me made me exercise more?<br><input type="radio"/> Strongly agree<br><input type="radio"/> Agree<br><input type="radio"/> Neither agree or disagree<br><input type="radio"/> Disagree<br><input type="radio"/> Strongly disagree                              |
| 6.                                                                                                                    | How many of the text messages sent to you did you read?<br><input type="radio"/> All<br><input type="radio"/> Approximately three quarters<br><input type="radio"/> Approximately one half<br><input type="radio"/> Approximately one quarter<br><input type="radio"/> None             |
| 7.                                                                                                                    | What did you do after receiving the text message?<br><input type="radio"/> Ignore it<br><input type="radio"/> Read and saved<br><input type="radio"/> Read and deleted                                                                                                                  |

Thinking about the text message component of the ENTICE intervention; please answer the following questions  
(part B)

8. Did you share your text messages with family friends or your health care providers?

- No
- Yes; (please specify)
- Spouse
  - Other family member
  - Doctor
  - Nurse
  - Other Health Care Professional

9. The text messages sent to me were worded in a suitable language

- Yes
- No

10. The text messages sent to me were too regular

- Yes
- No

11. The text message program (over 6 months) was long enough?

- Yes
- No

12. The text messages sent to me were at an appropriate time of the day/night?

- Yes
- No

**Supplement Table 4. Semi-structured Interview Schedule.**

| <i>Focus Point</i>                                             | <i>Key questions and prompts</i>                                                                                                                                                                                                                                                                                                                                                                                                                                                                                                                                                                                                                                                                                                                                                                                                                                                                                                                                                                                                                                                                                                                                                                                                                                                                                                                                                                                                                                                                                                                                                                                                                                                                                                                                                                                                                                                                                                 |
|----------------------------------------------------------------|----------------------------------------------------------------------------------------------------------------------------------------------------------------------------------------------------------------------------------------------------------------------------------------------------------------------------------------------------------------------------------------------------------------------------------------------------------------------------------------------------------------------------------------------------------------------------------------------------------------------------------------------------------------------------------------------------------------------------------------------------------------------------------------------------------------------------------------------------------------------------------------------------------------------------------------------------------------------------------------------------------------------------------------------------------------------------------------------------------------------------------------------------------------------------------------------------------------------------------------------------------------------------------------------------------------------------------------------------------------------------------------------------------------------------------------------------------------------------------------------------------------------------------------------------------------------------------------------------------------------------------------------------------------------------------------------------------------------------------------------------------------------------------------------------------------------------------------------------------------------------------------------------------------------------------|
| <i>1. Warm Up, rapport building, experiences</i>               | <p>I'm interested to hear about your story with a kidney condition. Would you be able to tell me about your story from when you first found out, how you felt and your journey up until now?</p> <ul style="list-style-type: none"> <li>- Can you tell me how you felt, or your initial reactions, when you were first diagnosed?</li> <li>- What was your experience with the healthcare system and dietitians before the ENTICE program?</li> </ul> <p>Can you talk me through how you got involved in the program? What happened?</p> <ul style="list-style-type: none"> <li>- How and why did you sign up? (Motivation? Knowledge? Priorities?)</li> <li>- Who influenced your decision to take part in the program? How? Why?</li> <li>- Did your doctor recommend the program? Did they have an influence on your decision to take part? (Support/pressure? Influence of medical professionals?)</li> </ul> <p>What happened after you signed up for the program?</p> <ul style="list-style-type: none"> <li>- Did you meet with a dietitian? How did you find that?</li> </ul>                                                                                                                                                                                                                                                                                                                                                                                                                                                                                                                                                                                                                                                                                                                                                                                                                                            |
| <i>2. Barriers and facilitators of adherence to program</i>    | <p>Before ENTICE, did you have any needs, challenges, concerns about diet? Could you briefly tell me about that?</p> <p>To what degree does the ENTICE program meet your needs or address what you want? How? Why?</p> <p>What do you like most/least about being involved in the program - why?</p> <p>What were some of the things that made the program easy/difficult to take part in?</p> <p>What are your thoughts on being in familiar surroundings while you're talking to [JK/MC]?</p>                                                                                                                                                                                                                                                                                                                                                                                                                                                                                                                                                                                                                                                                                                                                                                                                                                                                                                                                                                                                                                                                                                                                                                                                                                                                                                                                                                                                                                  |
| <i>3. Telehealth delivery methods and frequency of contact</i> | <p>Let's move on to your experiences with the phone calls.</p> <ul style="list-style-type: none"> <li>- What did you expect from the calls and did they meet your expectations?</li> <li>- What are your thoughts on never having seen [JK/MC] and building a relationship with them?</li> <li>- How do you think using the telephone is different to seeing someone in person? Feel any different being in a familiar environment compared to a clinic?</li> <li>- Can you share some things that made the phone calls easier/harder than seeing [JK/MC] in person?</li> <li>- Were you able to make the calls at a suitable time - how?</li> <li>- What do you think about the frequency of the calls? – why?</li> <li>- How did you feel about the length of the calls? Did you feel you were rushed during the calls?</li> <li>- Do you have anything more to add about the phone calls?</li> </ul> <p>Let's talk about the text messages now, what did you think about getting the text messages from [JK/MC]?</p> <ul style="list-style-type: none"> <li>- Can you give me an example of a text message that you liked the most/least?</li> <li>- Do you think the text messages were necessary - why?</li> <li>- What do you think about how frequently you got the text messages? Why?</li> <li>- Do you have anything more to add about the text messages?</li> </ul> <p>You got a workbook at the start of the program.</p> <ul style="list-style-type: none"> <li>- What are your thoughts on the information in the workbook? – why?</li> <li>- Can you give me an example of something from the workbook that had an impact on you? (Why? Motivation? Knowledge?)</li> <li>- Did you have any difficulties understanding the information in the workbook?</li> <li>- Did you show the workbook to anyone? Who? Why? What did they think?</li> <li>- Do you have anything more to add about the workbook?</li> </ul> |
| <i>4. Usability of the program</i>                             | <p>Can you think of an example recommendation that [JK/MC] gave you about your diet or your lifestyle?</p> <ul style="list-style-type: none"> <li>- What are some things that helped you/made it hard for you to follow recommendations? – why?</li> </ul>                                                                                                                                                                                                                                                                                                                                                                                                                                                                                                                                                                                                                                                                                                                                                                                                                                                                                                                                                                                                                                                                                                                                                                                                                                                                                                                                                                                                                                                                                                                                                                                                                                                                       |
| <i>5. Goal setting and self-monitoring</i>                     | <p>What are your thoughts on setting health goals?</p> <ul style="list-style-type: none"> <li>- How do you feel about goal setting?</li> <li>- Can you tell me about your experience with goal setting before the program?</li> <li>- Did you set goals in the program? When? Are you able to tell me about one of your goals?</li> <li>- Do you think ENTICE helped you to achieve your goals - why?</li> </ul> <p>One of the aims of ENTICE is to improve self monitoring –do you know what self-monitoring</p>                                                                                                                                                                                                                                                                                                                                                                                                                                                                                                                                                                                                                                                                                                                                                                                                                                                                                                                                                                                                                                                                                                                                                                                                                                                                                                                                                                                                                |

|                            |                                                                                                                                                                                                                                                                                                                                                                                                                                                                                                                                                                                                                                                                                                                                                                                                                                         |
|----------------------------|-----------------------------------------------------------------------------------------------------------------------------------------------------------------------------------------------------------------------------------------------------------------------------------------------------------------------------------------------------------------------------------------------------------------------------------------------------------------------------------------------------------------------------------------------------------------------------------------------------------------------------------------------------------------------------------------------------------------------------------------------------------------------------------------------------------------------------------------|
|                            | <p>means? (Stuff you'll do without people reminding you, like writing down or taking note of what you eat or how active you've been)</p> <ul style="list-style-type: none"> <li>- Do you find you do that? Why?</li> <li>- What impact do you think the program has had on your self-monitoring? (The way you go about it? How often?)</li> <li>- How confident do you feel with monitoring your diet? Why?</li> </ul>                                                                                                                                                                                                                                                                                                                                                                                                                  |
| 6. <i>Behaviour change</i> | <p>You have made some changes to your lifestyle in order to meet your goals [example]</p> <ul style="list-style-type: none"> <li>- Will these changes be something that you'll continue to do? – how? why?</li> <li>- Can you tell me about your motivation to make changes before the program?</li> <li>- How and why did your motivation change during the program?</li> <li>- How do you feel about keeping motivated after the program?</li> </ul> <p>Do you feel like your daily activities have changed since before the program? How? (Eating behaviour? Purchasing of foods? How physically active you are?)</p>                                                                                                                                                                                                                |
| 7. <i>Experiences</i>      | <ul style="list-style-type: none"> <li>- Did you feel that the recommendations from [JK/MC] were specific to you and nobody else?</li> <li>- Can you give an example of when you felt this way?</li> <li>- Were the recommendations clear? How? Why?</li> <li>- Do you understand why the advice was given to you?</li> <li>- Do you think the program and the telephone sessions were suited to your culture?</li> <li>- Did you share your experiences with the program with anybody else? Family, friends, other health professionals? How? Why? Did you find it helpful?</li> </ul> <p>Imagine you became director of the hospital and you had the power to improve the services for people with kidney disease. What would be the top 2 changes you would make to improve the care and support for people with kidney disease?</p> |
| 8. <i>Closing</i>          | <p>We would like you to help us evaluate the program to help improve it and the difference it makes to patients. Is there anything that you think would be important to mention that we haven't covered?</p>                                                                                                                                                                                                                                                                                                                                                                                                                                                                                                                                                                                                                            |

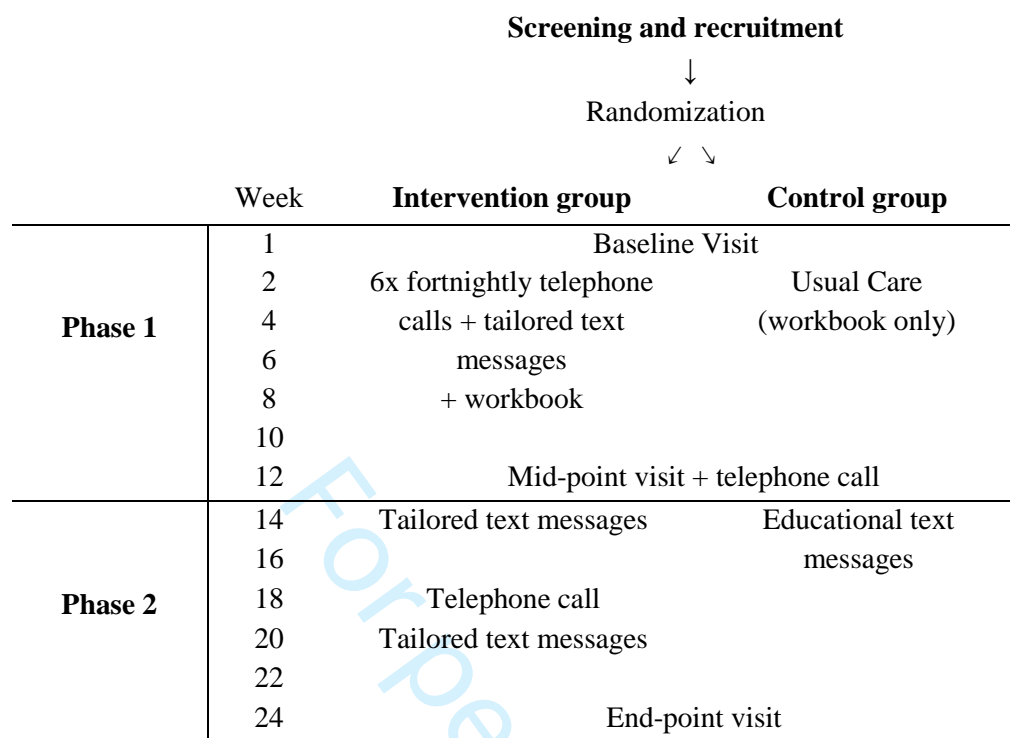

**Supplementary Figure 1.** Summary of ENTICE-CKD program delivery.

### References for supplementary material

1. NHMRC. Australian Dietary Guidelines. In. Canberra: National Health and Medical Research Council, Department of Health and Ageing; 2013.
2. Hoffmann TC, Glasziou PP, Boutron I, et al. Better reporting of interventions: template for intervention description and replication (TIDieR) checklist and guide. *The British Medical Journal*. 2014;348.
3. Whitlock EP, Orleans CT, Pender N, Allan J. Evaluating primary care behavioral counseling interventions: An evidence-based approach 1 1The full text of this article is available via AJPM Online at [www.ajpm-online.net](http://www.ajpm-online.net). *American journal of preventive medicine*. 2002;22(4):267-284.

For peer review only

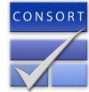

## CONSORT 2010 checklist of information to include when reporting a pilot or feasibility trial\*

| Section/Topic                    | Item No | Checklist item                                                                                                                                                                              | Reported on page No |
|----------------------------------|---------|---------------------------------------------------------------------------------------------------------------------------------------------------------------------------------------------|---------------------|
| <b>Title and abstract</b>        |         |                                                                                                                                                                                             |                     |
|                                  | 1a      | Identification as a pilot or feasibility randomised trial in the title                                                                                                                      | 1                   |
|                                  | 1b      | Structured summary of pilot trial design, methods, results, and conclusions (for specific guidance see CONSORT abstract extension for pilot trials)                                         | 4-5                 |
| <b>Introduction</b>              |         |                                                                                                                                                                                             |                     |
| Background and objectives        | 2a      | Scientific background and explanation of rationale for future definitive trial, and reasons for randomised pilot trial                                                                      | 6-7                 |
|                                  | 2b      | Specific objectives or research questions for pilot trial                                                                                                                                   | 7                   |
| <b>Methods</b>                   |         |                                                                                                                                                                                             |                     |
| Trial design                     | 3a      | Description of pilot trial design (such as parallel, factorial) including allocation ratio                                                                                                  | 8                   |
|                                  | 3b      | Important changes to methods after pilot trial commencement (such as eligibility criteria), with reasons                                                                                    | NA                  |
| Participants                     | 4a      | Eligibility criteria for participants                                                                                                                                                       | 8-9                 |
|                                  | 4b      | Settings and locations where the data were collected                                                                                                                                        | 12                  |
|                                  | 4c      | How participants were identified and consented                                                                                                                                              | 9                   |
| Interventions                    | 5       | The interventions for each group with sufficient details to allow replication, including how and when they were actually administered                                                       | 9-12                |
| Outcomes                         | 6a      | Completely defined prespecified assessments or measurements to address each pilot trial objective specified in 2b, including how and when they were assessed                                | 12-15               |
|                                  | 6b      | Any changes to pilot trial assessments or measurements after the pilot trial commenced, with reasons                                                                                        | NA                  |
|                                  | 6c      | If applicable, prespecified criteria used to judge whether, or how, to proceed with future definitive trial                                                                                 | NA                  |
| Sample size                      | 7a      | Rationale for numbers in the pilot trial                                                                                                                                                    | 12                  |
|                                  | 7b      | When applicable, explanation of any interim analyses and stopping guidelines                                                                                                                | NA                  |
| Randomisation:                   |         |                                                                                                                                                                                             |                     |
| Sequence generation              | 8a      | Method used to generate the random allocation sequence                                                                                                                                      | 9                   |
|                                  | 8b      | Type of randomisation(s); details of any restriction (such as blocking and block size)                                                                                                      | 9                   |
| Allocation concealment mechanism | 9       | Mechanism used to implement the random allocation sequence (such as sequentially numbered containers), describing any steps taken to conceal the sequence until interventions were assigned | 9                   |

|                                                      |     |                                                                                                                                                                                       |                    |
|------------------------------------------------------|-----|---------------------------------------------------------------------------------------------------------------------------------------------------------------------------------------|--------------------|
| Implementation                                       | 10  | Who generated the random allocation sequence, who enrolled participants, and who assigned participants to interventions                                                               | 9                  |
| Blinding                                             | 11a | If done, who was blinded after assignment to interventions (for example, participants, care providers, those assessing outcomes) and how                                              | 9-12               |
|                                                      | 11b | If relevant, description of the similarity of interventions                                                                                                                           | 8-11               |
| Statistical methods                                  | 12  | Methods used to address each pilot trial objective whether qualitative or quantitative                                                                                                | 14-15              |
| <b>Results</b>                                       |     |                                                                                                                                                                                       |                    |
| Participant flow (a diagram is strongly recommended) | 13a | For each group, the numbers of participants who were approached and/or assessed for eligibility, randomly assigned, received intended treatment, and were assessed for each objective | Figure 1           |
|                                                      | 13b | For each group, losses and exclusions after randomisation, together with reasons                                                                                                      | 15-16              |
| Recruitment                                          | 14a | Dates defining the periods of recruitment and follow-up                                                                                                                               | 8                  |
|                                                      | 14b | Why the pilot trial ended or was stopped                                                                                                                                              | NA                 |
| Baseline data                                        | 15  | A table showing baseline demographic and clinical characteristics for each group                                                                                                      | Table 1            |
| Numbers analysed                                     | 16  | For each objective, number of participants (denominator) included in each analysis. If relevant, these numbers should be by randomised group                                          | Results and tables |
| Outcomes and estimation                              | 17  | For each objective, results including expressions of uncertainty (such as 95% confidence interval) for any estimates. If relevant, these results should be by randomised group        | NA                 |
| Ancillary analyses                                   | 18  | Results of any other analyses performed that could be used to inform the future definitive trial                                                                                      | NA                 |
| Harms                                                | 19  | All important harms or unintended effects in each group (for specific guidance see CONSORT for harms)                                                                                 | NA                 |
|                                                      | 19a | If relevant, other important unintended consequences                                                                                                                                  | NA                 |
| <b>Discussion</b>                                    |     |                                                                                                                                                                                       |                    |
| Limitations                                          | 20  | Pilot trial limitations, addressing sources of potential bias and remaining uncertainty about feasibility                                                                             | 22-23              |
| Generalisability                                     | 21  | Generalisability (applicability) of pilot trial methods and findings to future definitive trial and other studies                                                                     | 22-23              |
| Interpretation                                       | 22  | Interpretation consistent with pilot trial objectives and findings, balancing potential benefits and harms, and considering other relevant evidence                                   | 19-23              |
|                                                      | 22a | Implications for progression from pilot to future definitive trial, including any proposed amendments                                                                                 | 22-24              |
| <b>Other information</b>                             |     |                                                                                                                                                                                       |                    |
| Registration                                         | 23  | Registration number for pilot trial and name of trial registry                                                                                                                        | 8                  |
| Protocol                                             | 24  | Where the pilot trial protocol can be accessed, if available                                                                                                                          | 8                  |
| Funding                                              | 25  | Sources of funding and other support (such as supply of drugs), role of funders                                                                                                       | Title page         |
|                                                      | 26  | Ethical approval or approval by research review committee, confirmed with reference number                                                                                            | 8                  |



Citation: Eldridge SM, Chan CL, Campbell MJ, Bond CM, Hopewell S, Thabane L, et al. CONSORT 2010 statement: extension to randomised pilot and feasibility trials. BMJ. 2016;355.

\*We strongly recommend reading this statement in conjunction with the CONSORT 2010, extension to randomised pilot and feasibility trials, Explanation and Elaboration for important clarifications on all the items. If relevant, we also recommend reading CONSORT extensions for cluster randomised trials, non-inferiority and equivalence trials, non-pharmacological treatments, herbal interventions, and pragmatic trials. Additional extensions are forthcoming: for those and for up to date references relevant to this checklist, see [www.consort-statement.org](http://www.consort-statement.org).

For peer review only
